# Supplementary material for: Iodine-PEG as a unique combination for the metal-free synthesis of flavonoids through iodonium-triiodide ion-pair complexation
Source: Royal Society of Chemistry journal article supplement (doi:10.1039/d3ra08810c), 2024-01-01
Supplement: d3ra08810c1.pdf [file d3ra08810c1.pdf]

## Supporting Information (SI)

### **Iodine-PEG as Unique Combination for the Mild and Efficient Metal-Free Synthesis of Flavonoids Through Iodonium-Triiodide Ion-Pair Complexation**

Naveen Kumar<sup>1</sup>, Navneet Sharma<sup>2</sup>, Vijay Kumar<sup>1</sup>, Vinay Kumar<sup>1</sup>, Kailash Jangid<sup>1,3</sup>, Bharti Devi<sup>1</sup>, Ashish Ranjan Dwivedi<sup>1,4</sup>, Kousik Giri<sup>2</sup>, Rakesh Kumar<sup>1</sup> and Vinod Kumar<sup>1\*</sup>

<sup>1</sup>*Laboratory of Organic and Medicinal Chemistry, Department of Chemistry, Central University of Punjab, Bathinda, Punjab, India-151401.*

<sup>2</sup>*Department of computational sciences, Central University of Punjab, Bathinda, Punjab, India-151401.*

<sup>3</sup>*Department of Pharmaceutical Sciences and Natural Products, Central University of Punjab, Bathinda, Punjab, India-151401.*

<sup>4</sup>*Gitam School of Pharmacy, Hyderabad, Telangana, 502329, India.*

#### **Corresponding Author:**

**\*Dr. Vinod Kumar**

Laboratory of Organic and Medicinal Chemistry, Department of Chemistry, Central University of Punjab, Bathinda, Punjab, India-151401.

E-mail: [vpathania18@gmail.com](mailto:vpathania18@gmail.com); [vinod.kumar@cup.edu.in](mailto:vinod.kumar@cup.edu.in)

Phone No. +911642864214

## Experimental

### General Information

All the chemicals were purchased from Sigma Aldrich and were used as received. The compounds synthesized by the general procedure described below and were characterised by mass spectrometry and  $^1\text{H}$  and  $^{13}\text{C}$  NMR spectra recorded on 600 MHz JEOL NMR spectrometer in either  $\text{CDCl}_3$  or  $\text{DMSO-d}_6$  with TMS as an internal reference at Central University of Punjab, Bathinda ( $^1\text{H}$  NMR: TMS at 0.00 ppm,  $\text{CDCl}_3$  at 7.26 ppm,  $\text{DMSO-d}_6$  at 2.5 ppm;  $^{13}\text{C}$  NMR:  $\text{CDCl}_3$  at 77.16 ppm,  $\text{DMSO-d}_6$  at 39.52 ppm). The spectroscopic data of all the synthesized compounds are consistent with the reported datas<sup>1</sup>.

### General Synthetic Procedure for (3a-3v)

A mixture of 2-Hydroxyacetophenone (1 equiv.), respective benzaldehyde (1 equiv.) and iodine (1 equiv.) was taken in a sealed tube in PEG-400 as solvent and heated at 140 °C for 4 to 7 hours. The completion of the reaction was checked by thin-layer chromatography. On completion of the reaction, it was cooled to room temperature, iodine was quenched by 10 % sodium thiosulphate solution and extracted with ethyl acetate. The crude product was purified on silica gel by column chromatography using pet. ether/ethyl acetate (3:1 to 6:1) as eluent to give the desired product (70-84 % yield).

### Characteristic Data of the Products

#### 2-phenyl-4H-chromon-4-one (3a).

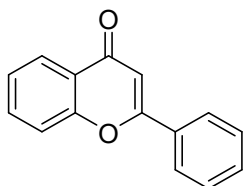

Off-white solid, 76 % yield. M.pt.: 96-98 °C.  $^1\text{H}$  NMR (600 MHz,  $\text{CDCl}_3$ )  $\delta$  6.84 (s, 1H), 7.41-7.44 (m, 1H), 7.51-7.55 (m, 3H), 7.58 (dd,  $J$ = 8.4, 1.2 Hz, 1H), 7.69-7.72 (m, 1H), 7.94 (dd,  $J$ = 7.8, 1.8 Hz, 2H), 8.24 (dd,  $J$ = 12.0, 6.0 Hz, 1H);  $^{13}\text{C}$  NMR (150 MHz,  $\text{CDCl}_3$ )  $\delta$  107.6, 118.1, 124.0, 125.2, 125.7, 126.3, 129.0, 131.6, 131.8, 133.7, 156.3, 163.43, 178.4. MS (EI,  $m/z$ ): 222.

#### 2-(4-methoxyphenyl)-4H-chromen-4-one (3b).

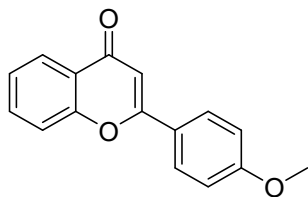

A white solid, 74 % yield. M.pt.: 156-158 °C.  $^1\text{H}$  NMR (600 MHz,  $\text{CDCl}_3$ )  $\delta$  3.89 (s, 3H), 6.75 (s, 1H), 7.03 (dd,  $J=6.6, 1.8$  Hz, 2H), 7.40-7.42 (m, 1H), 7.55 (dd,  $J=8.4, 1.2$  Hz, 1H), 7.67-7.70 (m, 1H), 7.89 (dd,  $J=6.6, 1.8$  Hz, 2H), 8.23 (dd,  $J=8.4, 1.8$  Hz, 1H);  $^{13}\text{C}$  NMR (150 MHz,  $\text{CDCl}_3$ )  $\delta$  55.5, 106.2, 114.4, 117.9, 123.9, 124.0, 125.0, 125.6, 128.0, 133.5, 156.2, 162.4, 163.4, 178.4. MS (EI,  $m/z$ ): 252.

### 2-(3,4-dimethoxyphenyl)-4H-chromen-4-one (3c).

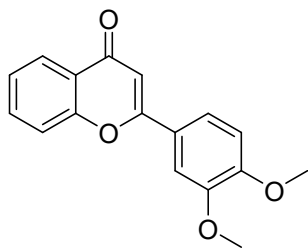

A yellowish solid, 78 % yield. M.pt.: 150-152 °C.  $^1\text{H}$  NMR (600 MHz,  $\text{CDCl}_3$ )  $\delta$  3.97 (s, 3H), 3.99 (s, 3H), 6.77 (s, 1H), 7.00 (d,  $J=8.4$  Hz, 1H), 7.42 (dd,  $J=15.0, 7.2$  Hz, 2H), 7.57 (d,  $J=8.4$  Hz, 2H), 7.68-7.71 (m, 1H), 8.23 (dd,  $J=7.8, 0.6$  Hz, 1H);  $^{13}\text{C}$  NMR (150 MHz,  $\text{CDCl}_3$ )  $\delta$  56.0, 56.1, 106.5, 108.8, 111.1, 118.0, 120.0, 123.9, 124.2, 125.1, 125.6, 133.6, 149.3, 152.0, 156.2, 163.3, 178.3. MS (EI,  $m/z$ ): 282.

### 2-(3,4,5-trimethoxyphenyl)-4H-chromen-4-one (3d).

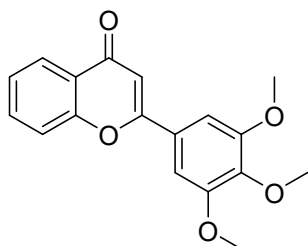

A yellowish solid, 81 % yield. M.pt.: 174-176 °C.  $^1\text{H}$  NMR (600 MHz,  $\text{CDCl}_3$ )  $\delta$  3.94 (s, 3H), 3.97 (s, 6H), 6.78 (s, 1H), 7.14 (s, 2H), 7.42-7.45 (m, 1H), 7.60 (dd,  $J=8.4, 0.6$  Hz, 1H), 7.72 (m, 1H),

8.24 (dd,  $J = 7.8, 1.8$  Hz, 1H);  $^{13}\text{C}$  NMR (150 MHz,  $\text{CDCl}_3$ )  $\delta$  56.3, 61.0, 103.6, 107.4, 118.0, 123.9, 125.3, 125.7, 127.0, 133.7, 141.2, 153.6, 156.2, 163.2, 178.4. MS (EI,  $m/z$ ): 312.

**2-(4-bromophenyl)-4H-chromen-4-one (3e)**

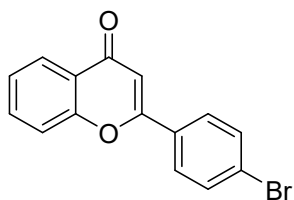

Off-white solid, 71 % yield. M.pt.: 178-180 °C.  $^1\text{H}$  NMR (600 MHz,  $\text{CDCl}_3$ )  $\delta$  6.81 (s, 1H), 7.44 (m, 1H), 7.57 (dd,  $J = 8.4, 0.6$  Hz, 1H), 7.67 (dd,  $J = 6.6, 1.8$  Hz, 2H), 7.70-7.73 (m, 1H), 7.80 (dd,  $J = 6.6, 1.8$  Hz, 2H), 8.23 (dd,  $J = 7.8, 1.2$  Hz, 1H);  $^{13}\text{C}$  NMR (150 MHz,  $\text{CDCl}_3$ )  $\delta$  107.7, 118.0, 123.9, 125.4, 125.7, 126.3, 127.7, 130.7, 132.3, 133.9, 156.1, 162.3, 187.3. MS (EI,  $m/z$ ): 300.

**2-(3,4-dichlorophenyl)-4H-chromen-4-one (3f)**

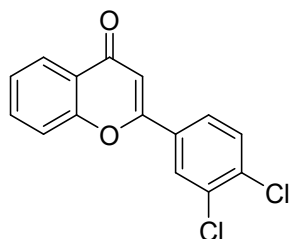

A yellowish solid, 76 % yield. M.pt.: 196-198 °C.  $^1\text{H}$  NMR (600 MHz,  $\text{CDCl}_3$ )  $\delta$  6.59 (s, 1H), 7.36 (t,  $J = 7.8$  Hz, 1H), 7.44-7.46 (m, 1H), 7.50-7.52 (m, 2H), 7.64 (dd,  $J = 7.8, 1.2$  Hz, 1H), 7.70-7.73 (m, 1H), 8.26 (dd,  $J = 7.8, 1.8$  Hz, 1H);  $^{13}\text{C}$  NMR (150 MHz,  $\text{CDCl}_3$ )  $\delta$  113.1, 118.2, 123.8, 125.5, 125.8, 127.6, 128.9, 131.5, 132.5, 134.0, 134.1, 134.5, 156.5, 162.3, 178.0. MS (EI,  $m/z$ ): 290.

**2-(3-bromophenyl)-4H-chromen-4-one (3g).**

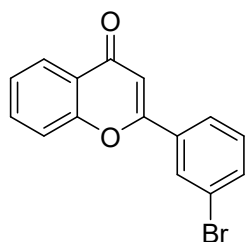

A brownish solid, 78 % yield. M.pt.: 114-116 °C. <sup>1</sup>H NMR (600 MHz, CDCl<sub>3</sub>) δ 6.79 (s, 1H), 7.40 (t, J= 7.8 Hz, 1H), 7.42-7.45 (m, 1H), 7.59 (dd, J=8.4, 1.2 Hz, 1H), 7.67 (ddd, J= 6.6, 1.2 Hz, 1H), 7.70-7.73 (m, 1H), 7.83 (ddd, J= 6.6, 1.2 Hz, 1H), 8.08 (t, J= 1.8 Hz, 1H), 8.23 (dd, J= 7.8, 1.8 Hz, 1H); <sup>13</sup>C NMR (150 MHz, CDCl<sub>3</sub>) δ 108.2, 118.1, 123.2, 123.9, 124.8, 125.4, 125.7, 129.2, 130.5, 133.8, 134.0, 134.4, 156.2, 161.7, 178.2. MS (EI, m/z): 300.

**4-(4-oxo-4H-chromen-2-yl)benzonitrile (3h).**

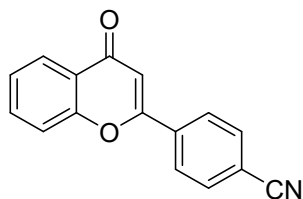

Off white solid, 82 % yield. M.pt.: 218-220 °C. <sup>1</sup>H NMR (600 MHz, CDCl<sub>3</sub>) δ 6.87 (s, 1H), 7.45-7.48 (m, 1H), 7.59 (d, J= 8.4 Hz, 1H), 7.73-7.76 (m, 1H), 7.84 (dd, J= 6.6, 1.8 Hz, 2H), 8.05 (dd, J= 6.6, 1.8 Hz, 2H), 8.25 (dd, J= 8.4, 1.8 Hz, 1H); <sup>13</sup>C NMR (150 MHz, CDCl<sub>3</sub>) δ 109.2, 115.0, 117.9, 118.1, 123.9, 125.7, 125.9, 126.8, 132.8, 134.3, 135.9, 156.1, 160.9, 178.0. MS (EI, m/z): 247.

**2-(4-isopropylphenyl)-4H-chromen-4-one (3i).**

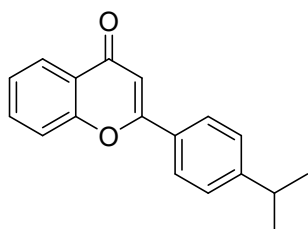

A brownish liquid, 81 % yield. <sup>1</sup>H NMR (600 MHz, CDCl<sub>3</sub>) δ 1.30 (d, J= 7.2, 6H), 2.99 (h, J= 6.6 Hz, 1H), 6.80 (s, 1H), 7.38 (d, J= 8.4 Hz, 2H), 7.39-7.42 (m, 1H), 7.56 (d, J= 7.8 Hz, 1H), 7.67-7.70 (m, 1H), 7.86 (dd, J= 6.6, 1.8 Hz, 2H), 8.23 (dd, J= 7.8, 1.8 Hz, 1H); <sup>13</sup>C NMR (150 MHz, CDCl<sub>3</sub>) δ 23.7, 34.1, 107.0, 118.0, 124.0, 125.1, 125.7, 126.4, 127.2, 129.3, 133.6, 153.0, 156.2, 163.6, 178.5. MS (EI, m/z): 264.

**2-(4-hydroxyphenyl)-4H-chromen-4-one (3j).**

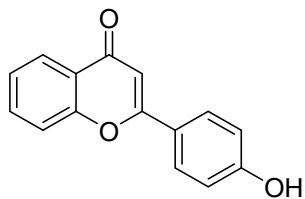

A yellowish solid, 84 % yield. M.pt.: 268-270 °C. <sup>1</sup>H NMR (600 MHz, DMSO) δ 6.87 (s, 1H), 6.95 (d, J= 9.0 Hz, 2H), 7.49 (t, J= 7.2 Hz, 1H), 7.76 (d, J= 7.8 Hz, 1H), 7.80-7.83 (m, 1H), 7.98 (d, J= 8.4 Hz, 2H), 8.04 (dd, J= 8.4, 2.4 Hz, 1H), 10.31 (s, 1H); <sup>13</sup>C NMR (150 MHz, DMSO) δ 104.7, 115.8, 118.2, 121.4, 123.2, 124.6, 125.2, 128.2, 133.9, 155.4, 160.8, 162.9, 176.7. MS (EI, m/z): 238.

### 2-(3-hydroxyphenyl)-4H-chromen-4-one (3k)

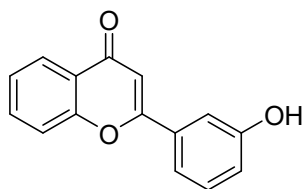

Off white solid, 79 % yield. M.pt.: 206-208 °C. <sup>1</sup>H NMR (600 MHz, DMSO) δ 6.94 (s, 1H), 7.03 (dd, J= 8.4, 2.4 Hz, 1H), 7.39 (t, J= 7.8 Hz, 1H), 7.46 (t, J= 1.8 Hz, 1H), 7.53 (dd, J= 15.6, 7.2 Hz, 2H), 7.78 (d, J= 8.4, 1H), 7.83-7.86 (m, 1H), 8.07 (dd, J= 7.8, 1.2 Hz, 1H), 9.91 (s, 1H); <sup>13</sup>C NMR (150 MHz, DMSO) δ 106.8, 112.7, 117.1, 118.4, 118.7, 123.2, 124.7, 125.4, 130.1, 132.3, 134.2, 155.5, 157.8, 162.6, 176.9. MS (EI, m/z): 238.

### 2-(4-hydroxy-3-methoxyphenyl)-4H-chromen-4-one (3l).

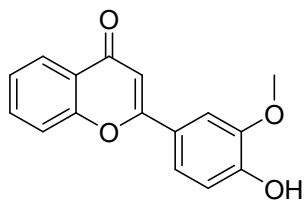

A brownish solid, 82 % yield. M.pt.: 190-192 °C. <sup>1</sup>H NMR (600 MHz, DMSO) δ 3.98 (s, 3H), 6.73 (s, 1H), 7.03 (d, J= 8.4 Hz, 1H), 7.41 (s, 1H), 7.43 (dd, J= 7.8, 0.6 Hz, 1H), 7.48 (dd, J= 8.4, 2.4 Hz, 1H), 7.60 (d, J= 7.8 Hz, 1H), 7.69-7.72 (m, 1H), 8.17 (dd, J= 7.8, 1.2 Hz, 1H), 9.11 (s, 1H); <sup>13</sup>C NMR (150 MHz, DMSO) δ 56.0, 105.6, 109.3, 115.8, 118.0, 120.3, 122.7, 123.7, 125.0, 125.2, 133.5, 147.9, 150.4, 156.0, 163.7, 178.0. MS (EI, m/z): 268.

**2-(3-hydroxy-4-methoxyphenyl)-4H-chromen-4-one (3m).**

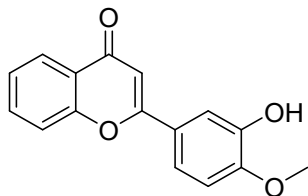

A yellowish solid, 77 % yield. M.pt.: 148-150 °C. <sup>1</sup>H NMR (600 MHz, DMSO) δ 3.96 (s, 3H), 6.70 (s, 1H), 6.99 (dd, J= 6.0, 3.0 Hz, 1H), 7.42 (t, J= 7.2 Hz, 1H), 7.47-7.48 (m, 1H), 7.49 (s, 1H), 7.57 (d, J= 8.4 Hz, 1H), 7.70-7.72 (m, 1H), 8.18 (dd, J= 7.8, 1.2 Hz, 1H), 8.58 (s, 1H); <sup>13</sup>C NMR (150 MHz, DMSO) δ 55.9, 106.0, 113.0, 113.0, 118.0, 118.5, 123.8, 124.2, 125.0, 125.3, 133.6, 146.8, 150.7, 156.1, 163.5, 178.1. MS (EI, m/z): 268.

**2-(3-ethoxy-4-hydroxyphenyl)-4H-chromen-4-one (3n).**

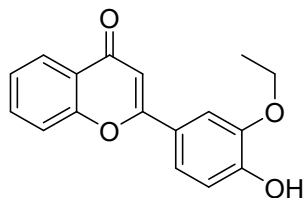

A yellow solid, 84 % yield. M.pt.: 150-152 °C. <sup>1</sup>H NMR (600 MHz, DMSO) δ 1.39 (t, J= 6.6 Hz, 3H), 4.18 (q, J= 7.2 Hz, 2H), 6.98 (t, 4.5 Hz, 2H), 7.47-7.50 (m, 1H), 7.59-7.61 (m, 2H), 7.77 (dd, J= 8.4, 0.6 Hz, 1H), 7.80-7.82 (m, 1H), 8.04 (dd, J= 7.8, 1.8 Hz, 1H), 9.84 (s, 1H); <sup>13</sup>C NMR (150 MHz, DMSO) δ 14.6, 64.1, 105.0, 111.3, 115.7, 118.3, 120.1, 121.8, 123.2, 124.6, 125.1, 133.8, 147.1, 150.6, 155.5, 162.9, 176.8. MS (EI, m/z): 282.

**2-(3,4-dihydroxyphenyl)-4H-chromen-4-one (3o).**

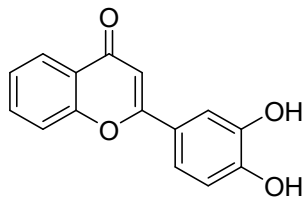

A brown solid, 81 % yield. M.pt.: 242-244 °C. <sup>1</sup>H NMR (600 MHz, DMSO) δ 6.77 (s, 1H), 6.93 (d, J= 9.0 Hz, 1H), 7.47 (dt, J= 6.6, 1.8 Hz, 2H), 7.5 (d, J= 6.6 Hz, 1H), 7.73 (d, J= 7.8 Hz, 1H), 7.80-7.83 (m, 1H), 8.05 (dd, J= 7.8, 1.2 Hz, 1H), 9.44 (s, 1H), 9.86 (s, 1H); <sup>13</sup>C NMR (150 MHz,

DMSO)  $\delta$  104.7, 113.3, 115.9, 118.1, 118.7, 121.8, 123.2, 124.6, 125.2, 133.9, 145.6, 149.3, 155.4, 136.1, 176.6. MS (EI, m/z): 254.

**2-(thiophen-2-yl)-4H-chromen-4-one (3t).**

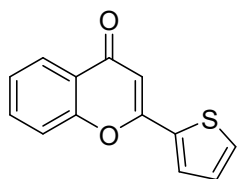

A yellowish solid, 71% yield. M.pt.: 98-100 °C.  $^1\text{H}$  NMR (600 MHz,  $\text{CDCl}_3$ )  $\delta$  6.70 (s, 1H), 7.18 (dd,  $J=4.2, 1.2$  Hz, 1H), 7.41 (t,  $J=8.4$  Hz, 1H), 7.52 (d,  $J=9.0$  Hz, 1H), 7.57 (dd,  $J=4.2, 1.2$  Hz, 1H), 7.67-7.69 (m, 1H), 7.72 (dd,  $J=3.0, 1.2$  Hz, 1H);  $^{13}\text{C}$  NMR (150 MHz,  $\text{CDCl}_3$ )  $\delta$  106.2, 117.9, 124.0, 125.2, 125.7, 128.4, 128.5, 130.2, 133.74, 135.2, 155.9, 159.0, 177.8. MS (EI, m/z): 228.

**2-(4-nitrophenyl)-4H-chromen-4-one (3u)**

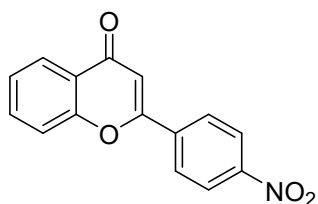

A yellowish solid, 74% yield. M.pt.: 244-246 °C.  $^1\text{H}$  NMR (600 MHz,  $\text{CDCl}_3$ )  $\delta$  6.91 (s, 1H), 7.47 (t,  $J=7.8$  Hz, 1H), 7.61 (d,  $J=8.4$  Hz, 1H), 7.76 (t,  $J=7.8$  Hz, 1H), 8.12 (d,  $J=8.4$  Hz, 2H), 8.25 (d,  $J=7.8$  Hz, 1H), 8.39 (d,  $J=8.4$  Hz, 2H);  $^{13}\text{C}$  NMR (150 MHz,  $\text{CDCl}_3$ )  $\delta$  109.6, 118.1, 123.9, 124.2, 125.7, 125.9, 127.2, 134.3, 137.6, 149.4, 156.2, 160.5, 177.9. MS (EI, m/z): 267.

**2-(3,4-dihydroxyphenyl)-6-hydroxy-4H-chromen-4-one (3v)**

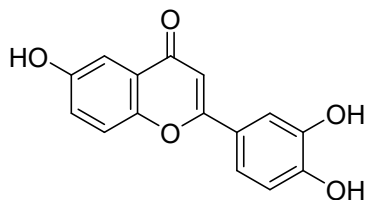

A off white solid, 72% yield.  $^1\text{H}$  NMR (600 MHz,  $\text{CDCl}_3$ )  $\delta$  6.67 (s, 1H), 6.90 (d,  $J=9.0$  Hz, 1H), 7.23 (dd,  $J=6.0, 3.0$  Hz, 1H), 7.31 (d,  $J=3.0$  Hz, 1H), 7.41-7.43 (m, 2H), 7.58 (d,  $J=9.0$  Hz,



1H), 9.39-9.96 (s, 3H, OH); <sup>13</sup>C NMR (150 MHz, CDCl<sub>3</sub>) δ 104.4, 108.1, 113.7, 116.5, 119.1, 120.0, 122.7, 123.2, 124.7, 146.2, 149.7, 155.2, 163.3, 177.2. MS (EI, m/z): 270.

### Spectroscopic data of some isolated intermediates/side products

#### 2-(4-nitrophenyl)-chroman-4-one

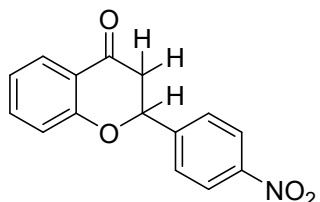

A yellowish solid, <sup>1</sup>H NMR (600 MHz, CDCl<sub>3</sub>) δ 2.95 (dd, J= 13.2, 3.6 Hz, 1H), 3.02 (dd, J= 13.2, 3.6 Hz, 1H), 5.61 (dd, J= 9.6, 3.0 Hz, 1H), 7.09-7.11 (m, 2H), 7.55 (td, J= 7.2, 1.2 Hz, 1H), 7.68 (d, J= 9.0, 2H), 7.94 (dd, J= 6.0, 1.8 Hz, 1H), 8.30 (d, J= 8.4 Hz, 2H); <sup>13</sup>C NMR (150 MHz, CDCl<sub>3</sub>) δ 44.6, 78.3, 118.0, 120.9, 122.2, 124.1, 126.8, 127.2, 136.5, 145.8, 148.0, 160.9, 190.6.

#### (E)-1-(2-hydroxyphenyl)-3-(4-nitrophenyl)prop-2-en-1-one

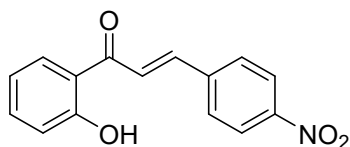

A yellowish solid, <sup>1</sup>H NMR (600 MHz, DMSO) δ 7.02 (dd, J= 6.0, 2.4 Hz, 2H), 7.58 (t, J= 7.2 Hz, 1H), 7.88 (d, J= 15.6 Hz, 1H), 8.17 (t, J= 13.8 Hz, 3H), 8.22 (d, J= 7.8 Hz, 1H), 8.28 (d, J= 8.4 Hz, 2H), 12.21 (s, 1H, OH); <sup>13</sup>C NMR (150 MHz, DMSO) δ 118.2, 119.8, 121.5, 124.4, 126.8, 130.5, 131.5, 137.0, 141.4, 141.9, 148.7, 162.1, 193.7.

#### (E)-1-(2-hydroxyphenyl)-3-(4-methoxyphenyl)prop-2-en-1-one

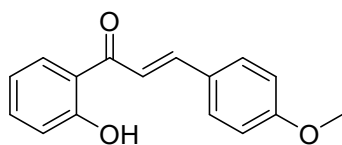

A white solid, <sup>1</sup>H NMR (600 MHz, CDCl<sub>3</sub>) δ 3.87 (s, 3H), 6.93 (dd, J= 6.0, 1.2 Hz, 1H), 6.95 (dd, J= 4.8, 1.8 Hz, 2H), 7.02 (dd, J= 7.2, 1.2 Hz, 1H), 7.49 (td, J= 6.6, 1.8 Hz, 1H), 7.54 (d, J= 15.6 Hz, 1H), 7.63 (d, J= 9.0 Hz, 2H), 7.90 (d, J= 12.0 Hz, 1H), 7.92 (dd, J= 4.8, 1.8 Hz, 1H), 12.93 (s,

1H, OH); <sup>13</sup>C NMR (150 MHz, CDCl<sub>3</sub>) δ 55.4, 114.5, 117.6, 118.6, 118.7, 120.1, 127.3, 129.5, 130.5, 136.1, 145.3, 162.0, 163.5, 193.7.

**(Z)-3-(4-methoxybenzylidene)-2-(4-methoxyphenyl)chroman-4-one**

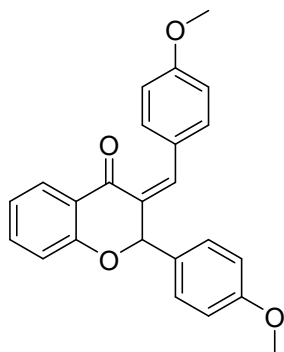

A white solid, <sup>1</sup>H NMR (600 MHz, CDCl<sub>3</sub>) δ 3.73 (s, 3H), 3.80 (s, 3H), 6.61 (s, 1H), 6.83 (dd, J= 4.8, 1.8 Hz, 2H), 6.87 (dd, J= 4.8, 1.8 Hz, 2H), 6.89 (dd, J= 7.2, 1.2 Hz, 1H), 6.93-6.95 (m, 1H), 7.24 (dd, J= 4.8, 1.8 Hz, 2H), 7.36-7.38 (m, 1H), 7.39 (dd, J= 8.4, 0.6 Hz, 2H), 7.92 (dd, J= 6.0, 1.8 Hz, 1H), 8.04 (s, 1H); <sup>13</sup>C NMR (150 MHz, CDCl<sub>3</sub>) δ 55.2, 55.4, 77.7, 114.2, 114.4, 118.6, 121.6, 122.3, 126.8, 127.6, 129.1, 130.2, 130.5, 132.2, 135.9, 139.1, 158.8, 159.8, 161.0, 182.7.

**3-(4-methoxybenzyl)-2-(4-methoxyphenyl)-4H-chromen-4-one**

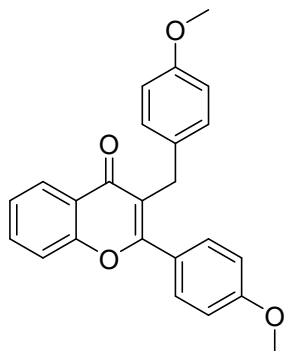

A white solid, <sup>1</sup>H NMR (600 MHz, CDCl<sub>3</sub>) δ 3.75 (s, 3H), 3.87 (s, 3H), 3.92 (s, 2H), 6.77 (dt, J= 4.8, 1.8 Hz, 2H), 6.97 (dt, J= 4.8, 1.8 Hz, 2H), 7.07 (d, J= 9.0 Hz, 2H), 7.38-7.40 (m, 1H), 7.46 (d, J= 8.4 Hz, 1H), 7.53 (dt, J= 4.8, 1.8 Hz, 2H), 7.64-7.66 (m, 1H), 8.24 (dd, J= 6.6, 1.2 Hz, 1H); <sup>13</sup>C NMR (150 MHz, CDCl<sub>3</sub>) δ 30.5, 55.2, 55.4, 113.8, 113.9, 117.8, 120.3, 123.0, 124.7, 125.6, 126.1, 129.0, 130.2, 132.4, 133.4, 156.1, 157.8, 161.2, 162.7, 178.3.

**(E)-1-(2-hydroxyphenyl)-3-(4-hydroxyphenyl)prop-2-en-1-one**

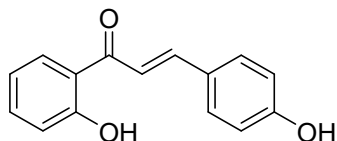

A white solid,  $^1\text{H}$  NMR (600 MHz,  $\text{CDCl}_3$ )  $\delta$  6.89 (d,  $J$ = 9.0 Hz, 2H), 6.94 (m, 1H), 7.02 (dd,  $J$ = 7.2, 1.2 Hz, 1H), 7.48-7.50 (m, 1H), 7.54 (d,  $J$ = 15.6 Hz, 1H), 7.59 (d,  $J$ = 8.4 Hz, 2H), 7.89 (d,  $J$ = 15.6 Hz, 1H), 7.92 (dd,  $J$ = 6.6, 1.8 Hz, 1H), 12.92 (s, 1H, OH);  $^{13}\text{C}$  NMR (150 MHz,  $\text{CDCl}_3$ )  $\delta$  116.1, 117.8, 118.6, 118.8, 120.20, 127.6, 129.6, 130.8, 136.2, 145.3, 158.3, 136.6, 193.8.

### 2-phenylchroman-4-one

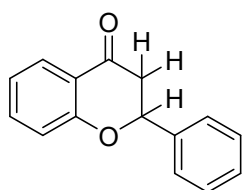

A white solid,  $^1\text{H}$  NMR (600 MHz,  $\text{CDCl}_3$ )  $\delta$  2.90 (dd,  $J$ = 13.8, 3.0 Hz, 1H), 3.09 (dd,  $J$ = 13.2, 3.6 Hz, 1H), 5.49 (dd,  $J$ = 10.2, 3.0 Hz, 1H), 7.06 (m, 2H), 7.39 (tt,  $J$ = 3.6, 1.2 Hz, 1H), 7.44 (m, 2H), 7.49 (dd,  $J$ = 7.2, 1.2 Hz, 2H), 7.51 (dt,  $J$ = 5.4, 1.8 Hz, 1H), 7.94 (dd,  $J$ = 6.6, 1.8 Hz, 1H);  $^{13}\text{C}$  NMR (150 MHz,  $\text{CDCl}_3$ )  $\delta$  44.7, 79.6, 118.1, 120.9, 121.6, 126.1, 127.0, 128.8, 128.8, 136.2, 138.7, 161.5, 191.9.

### DFT calculations

All the DFT calculations were performed using the ORCA 5.0.3 software.<sup>2</sup> Density functional theory was employed with PBE0 functional<sup>3</sup>, dispersion corrections based on tight binding partial charges (D4)<sup>4</sup> along with Ahlrichs and co-workers balanced polarised double zeta basis set (def2-svp).<sup>5</sup> RIJCOSX<sup>6</sup> approximation was used throughout to speed up the calculations. Transition states were calculated by implementing Nudged-Elastic-Band method of Asgeirsson *et al.*<sup>7</sup> All minima on the potential energy surface were verified by calculating the vibrational frequencies using the same level of theory. Furthermore, for refinement in results, a higher valence polarised triple zeta basis set (def2-tzvp) was employed with PBE0 functional to calculate the single point-energy of the whole system. The solute-solvent interaction is described by the conductor-like polarizable continuum model (CPCM)<sup>8</sup>. The dielectric constant & refractive index of PEG-400 is taken as 11.6 and 54 respectively.

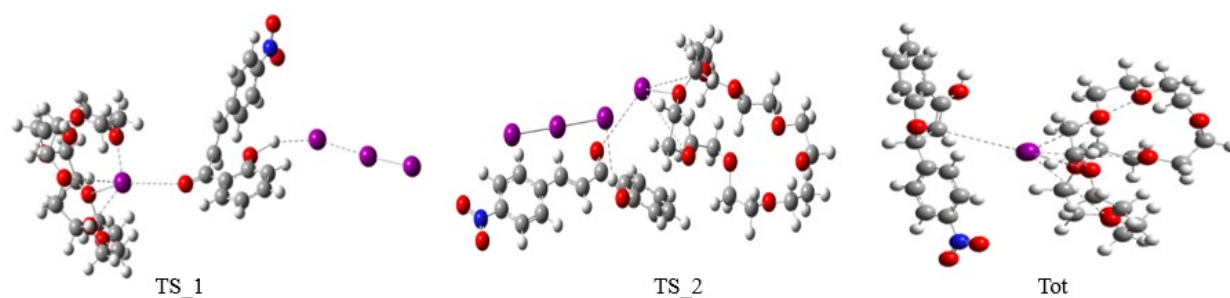

**Fig. S1** Interaction diagrams of acetophenone and tautomer with PEG-400, and the interaction of PEG-400 in transition states 1 and 2.

**Table: S1** Energies of the various species including starting materials, intermediates, and transition states. ( $E_{\text{elec}}$  = Electronic energy in gas phase,  $G^{\text{S}}$  = Gibbs free energy in solvent,  $H^{\text{S}}$  = Enthalpy in solvent)

| Species | $E_{\text{elec}}$  | $G^{\text{S}}$ | $H^{\text{S}}$ |
|---------|--------------------|----------------|----------------|
| A       | -459.787145932339  | -459.69504252  | -459.62810581  |
| B       | -933.109691205920  | -932.94527555  | -932.84716421  |
| C       | -931.928190775293  | -931.78145045  | -931.68880309  |
| D       | -933.132746285290  | -932.96457866  | -932.86981981  |
| PEG     | -1229.39191956     | -1229.39191956 | -1229.39191956 |
| PEGI    | -1527.311172488971 | -1526.90311373 | -1526.76751762 |
| $I_3^-$ | -893.393896594535  | -893.43782180  | -893.38404157  |
| TS_1    | -1230.174097750667 | -1230.02694086 | -1229.92264379 |
| TS_2    | -3353.862490186070 | -3353.28177433 | -3353.04872527 |
| II      | -1306.559198882304 | -1306.42286120 | -1306.27986039 |
| III     | -1009.513839334502 | -1009.32305888 | -1009.22064602 |
| IV      | -1230.258995954341 | -1230.10501402 | -1230.00402559 |
| TOT     | -933.110141544027  | -932.94205030  | -932.84707574  |
| $I_2$   | -595.464519981321  | -595.50146074  | -595.45857235  |
| $H_2O$  | -76.387365438931   | -76.39236652   | -76.36092331   |
| HI      | -298.320747908430  | -298.34492113  | -298.31093735  |

# <sup>1</sup>H NMR Spectra (CDCl<sub>3</sub>) of 3a

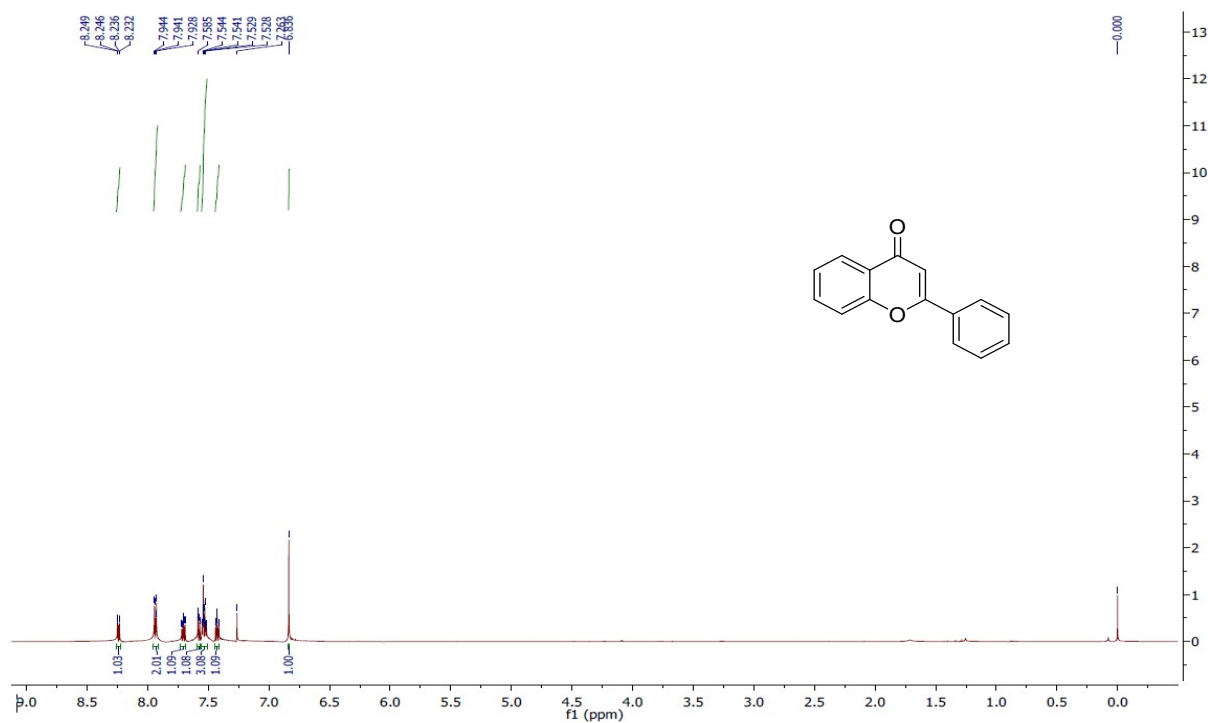

# <sup>13</sup>C NMR Spectra (CDCl<sub>3</sub>) of 3a

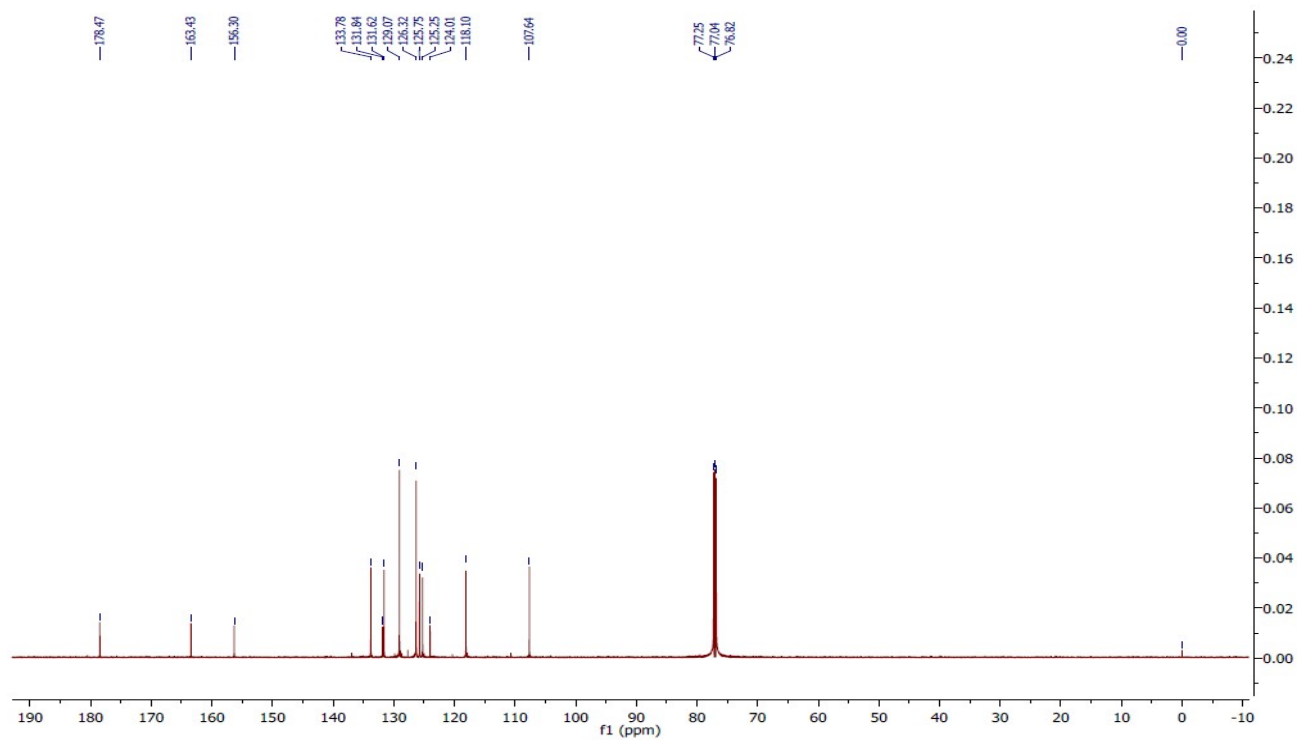

# Mass Spectra of 3a

Line#: 1 R.Time: 4.3300(Scan#: 567)

MassPeaks: 386

RawMode: Averaged 4.3250-4.3350(566-568) BasePeak: 222.0500(350886)

BG Mode: Calc. from Peak Group 1 - Event 1

MS Spectrum

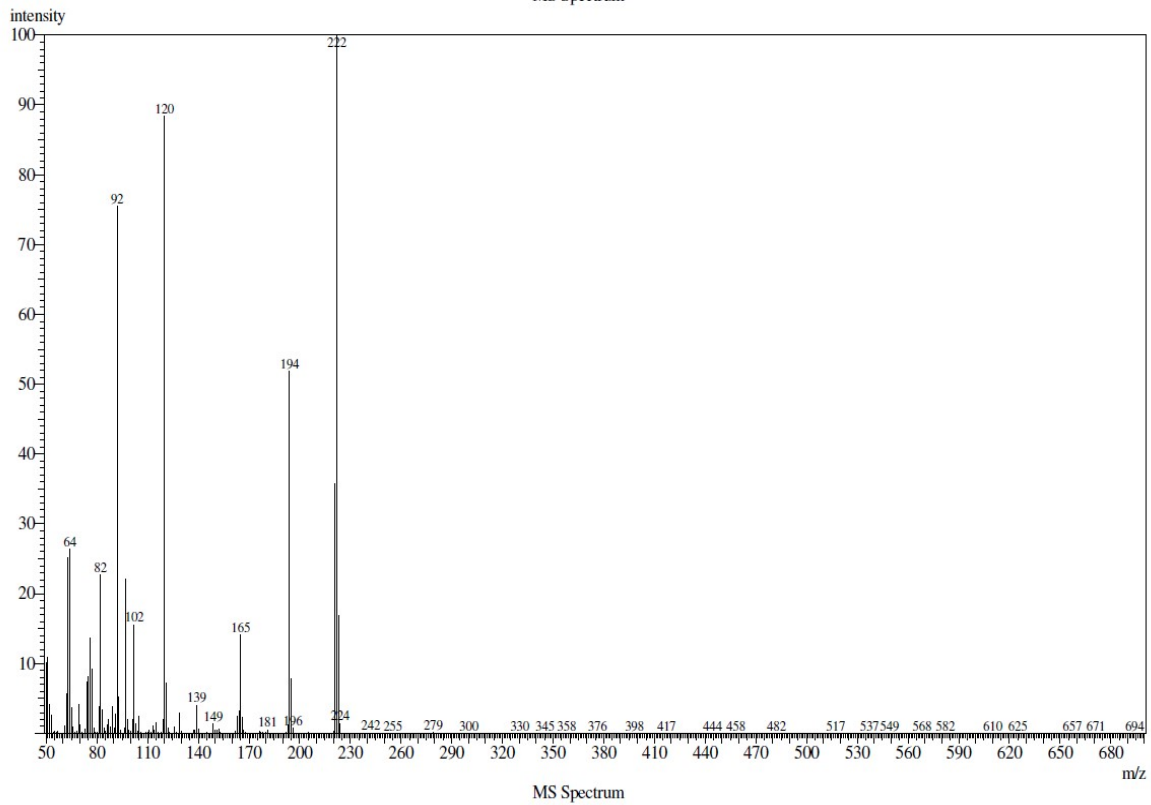

# <sup>1</sup>H NMR Spectra (CDCl<sub>3</sub>) of 3b

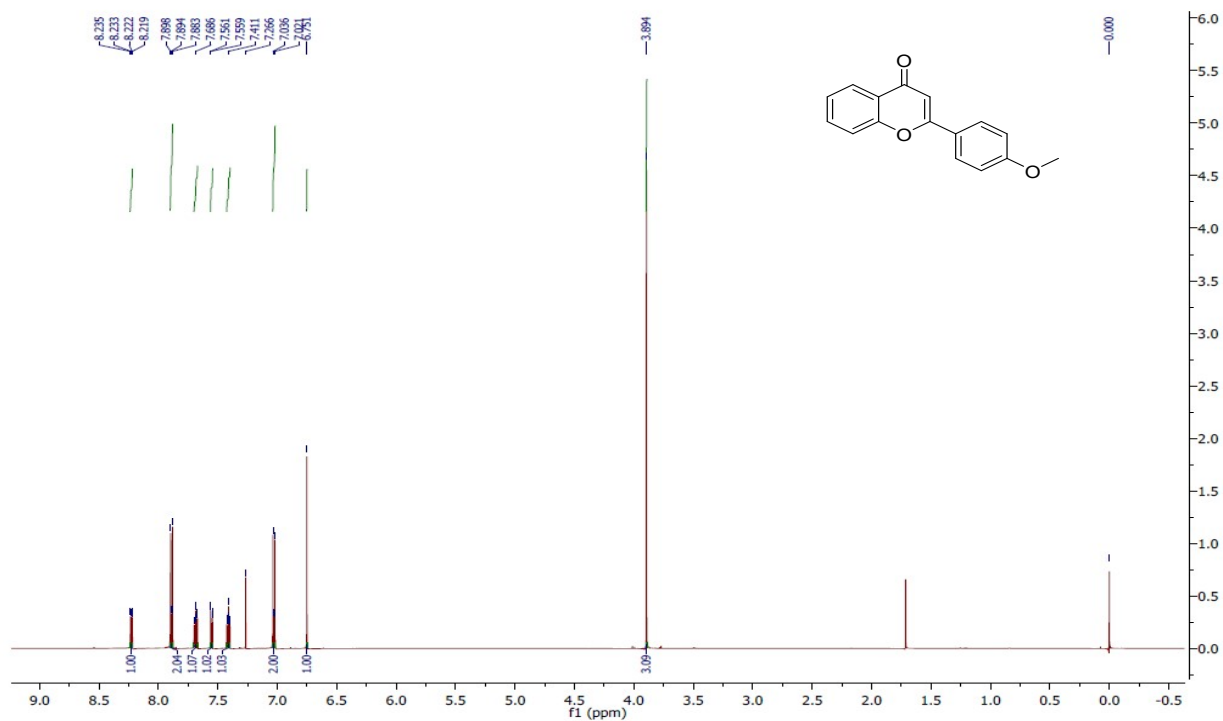

# <sup>13</sup>C NMR Spectra (CDCl<sub>3</sub>) of 3b

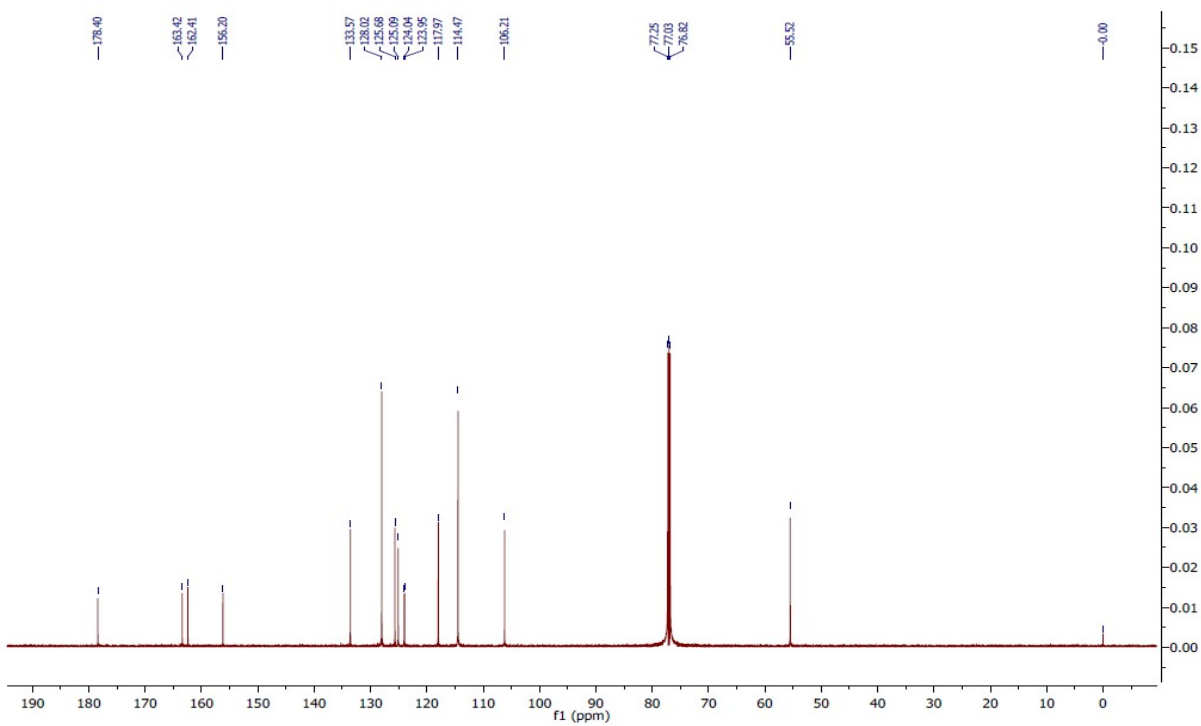

# Mass Spectra of 3b

Line#: 1 R.Time: 7.2600(Scan#: 1153)  
MassPeaks: 444  
RawMode: Averaged 7.2550-7.2650(1152-1154) BasePeak: 254.1000(3728)  
BG Mode: Calc. from Peak Group 1 - Event 1

MS Spectrum

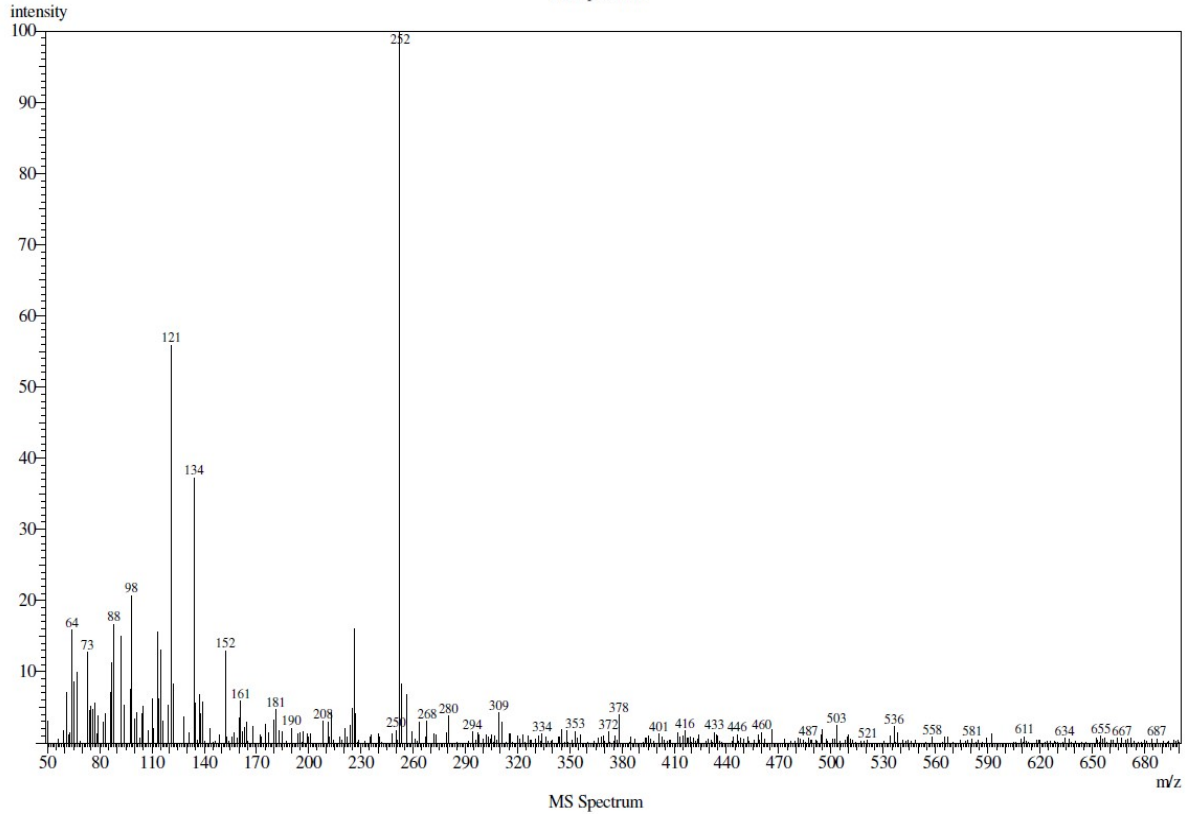



# <sup>1</sup>H NMR Spectra (CDCl<sub>3</sub>) of 3c

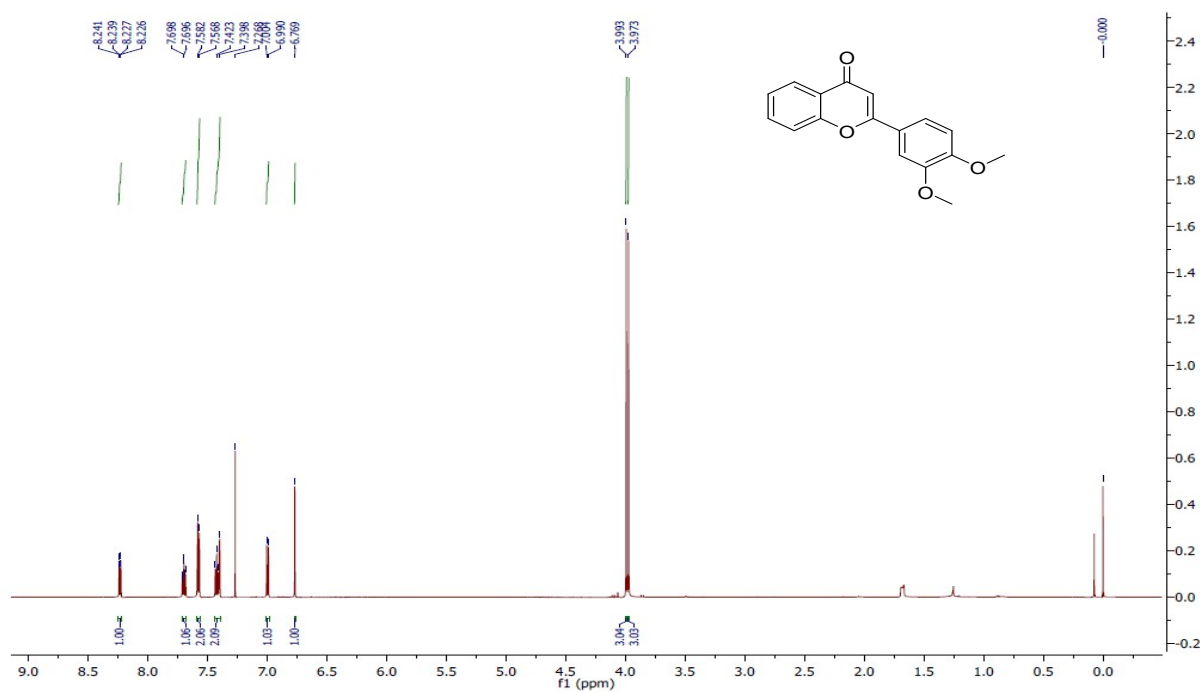

# <sup>13</sup>C NMR Spectra (CDCl<sub>3</sub>) of 3c

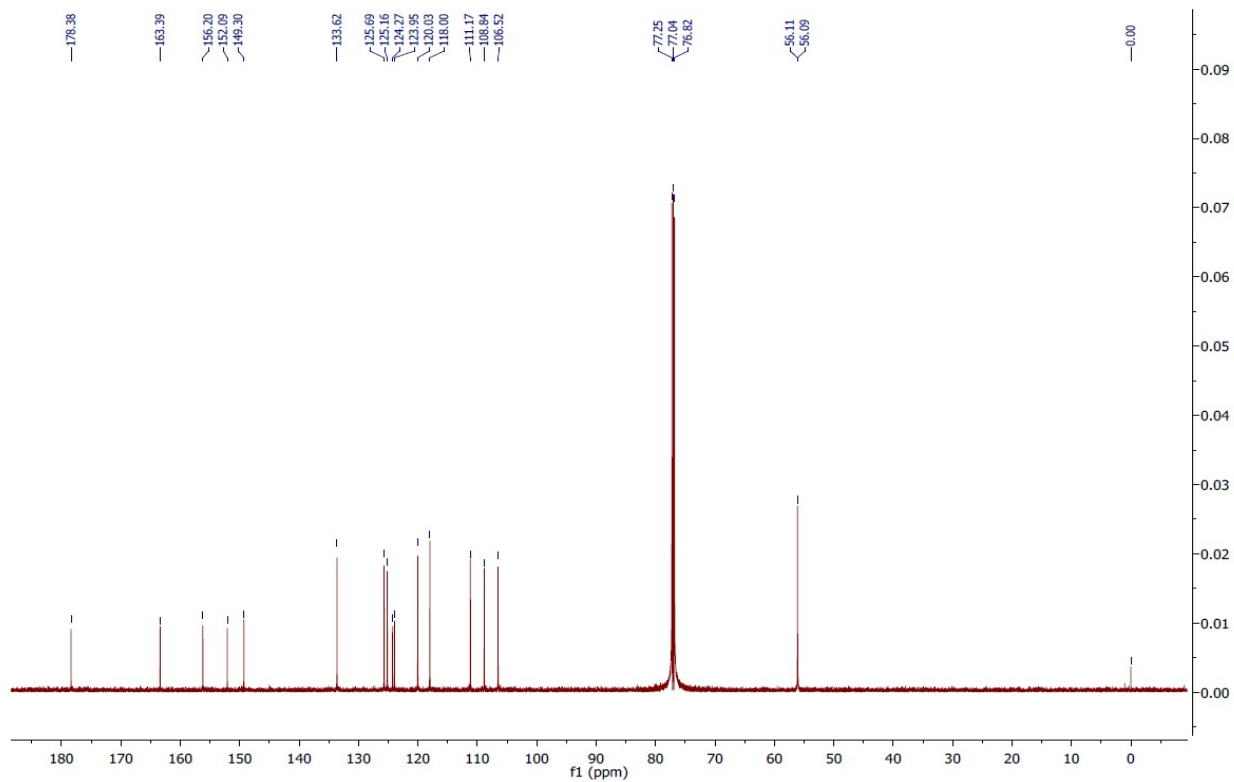

# Mass Spectra of 3c

Line#: 1 R.Time:6.6300(Scan#:1027)

MassPeaks:568

RawMode:Averaged 6.6250-6.6350(1026-1028) BasePeak:282.1500(170587)

BG Mode:Calc. from Peak Group 1 - Event 1

MS Spectrum

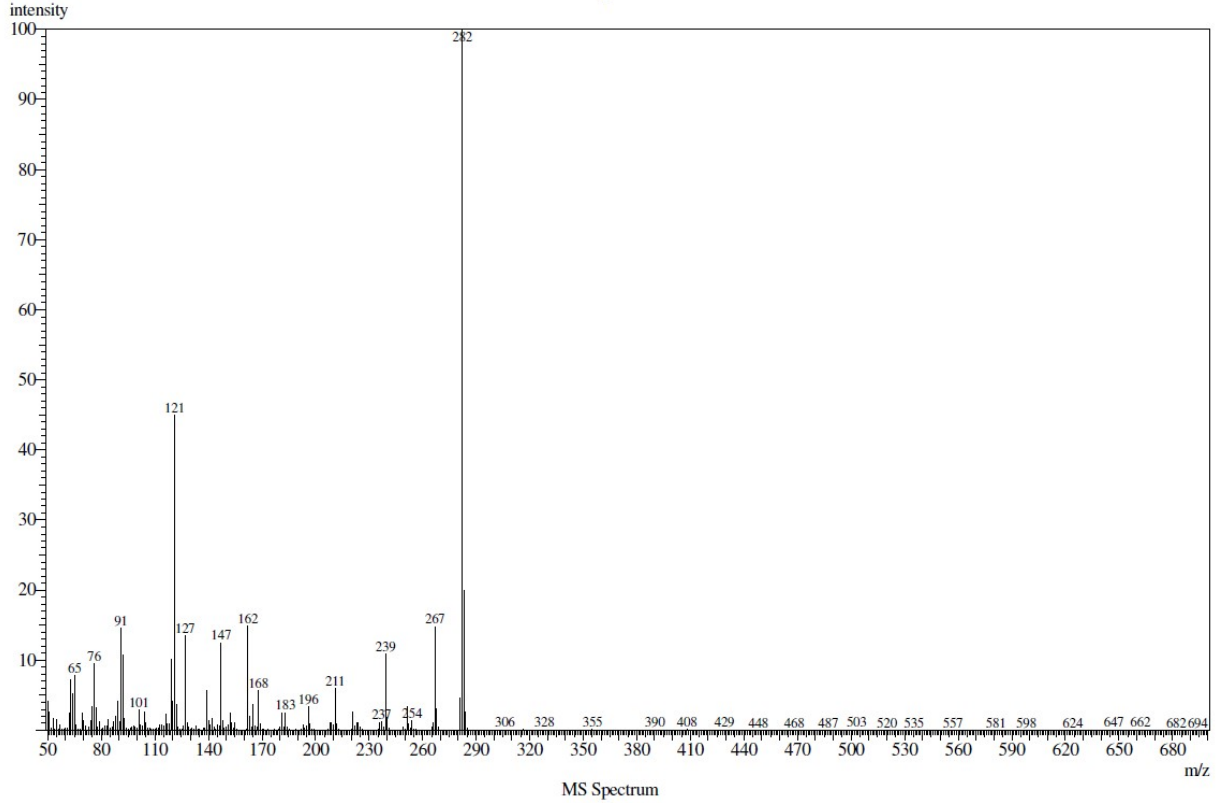

# <sup>1</sup>H NMR Spectra (CDCl<sub>3</sub>) of 3d

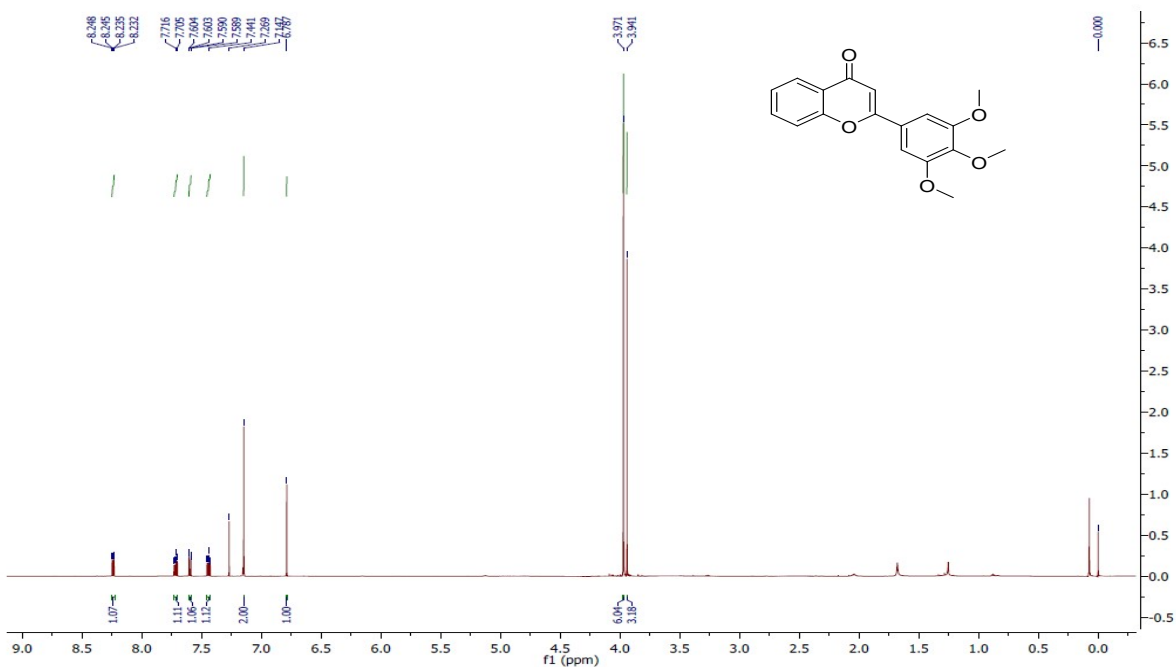

# <sup>13</sup>C NMR Spectra (CDCl<sub>3</sub>) of 3d

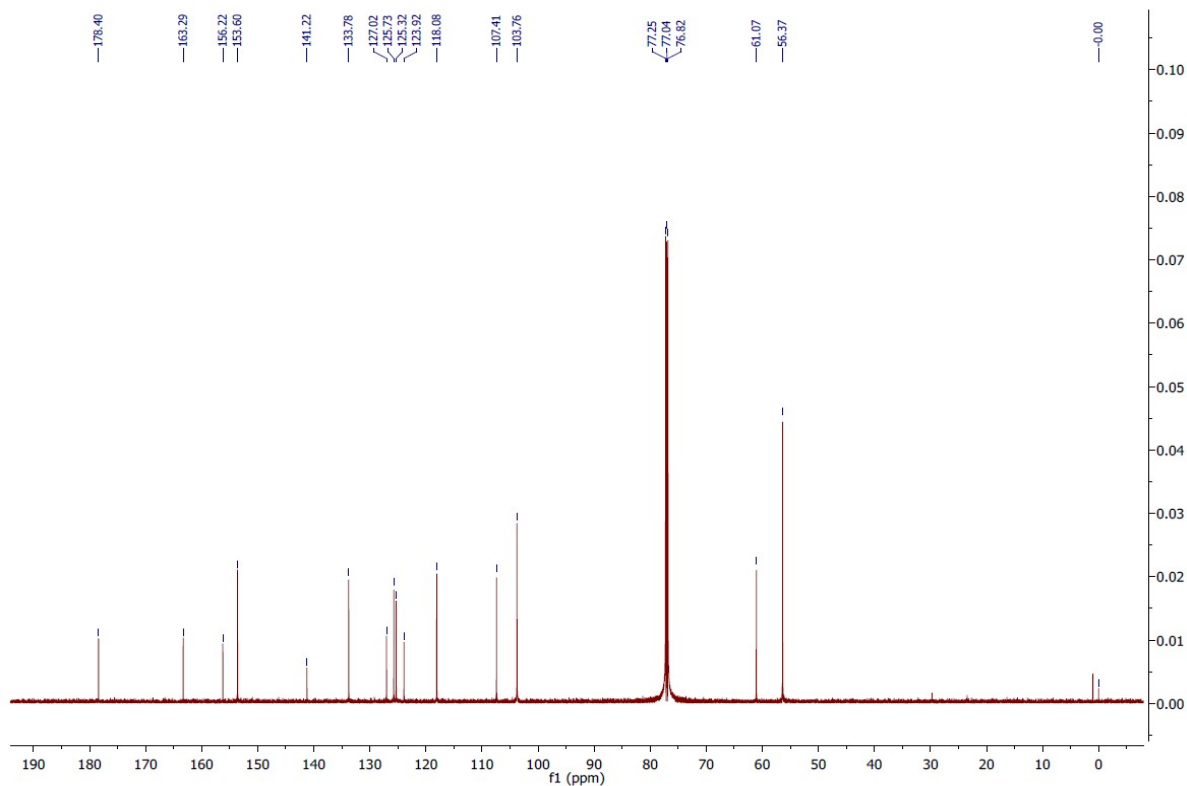

# Mass Spectra of 3d

Line#:1 R.Time:4.9150(Scan#:684)  
MassPeaks:576  
RawMode:Averaged 4.9100-4.9200(683-685) BasePeak:268.1000(5803)  
BG Mode:Calc. from Peak Group 1 - Event 1

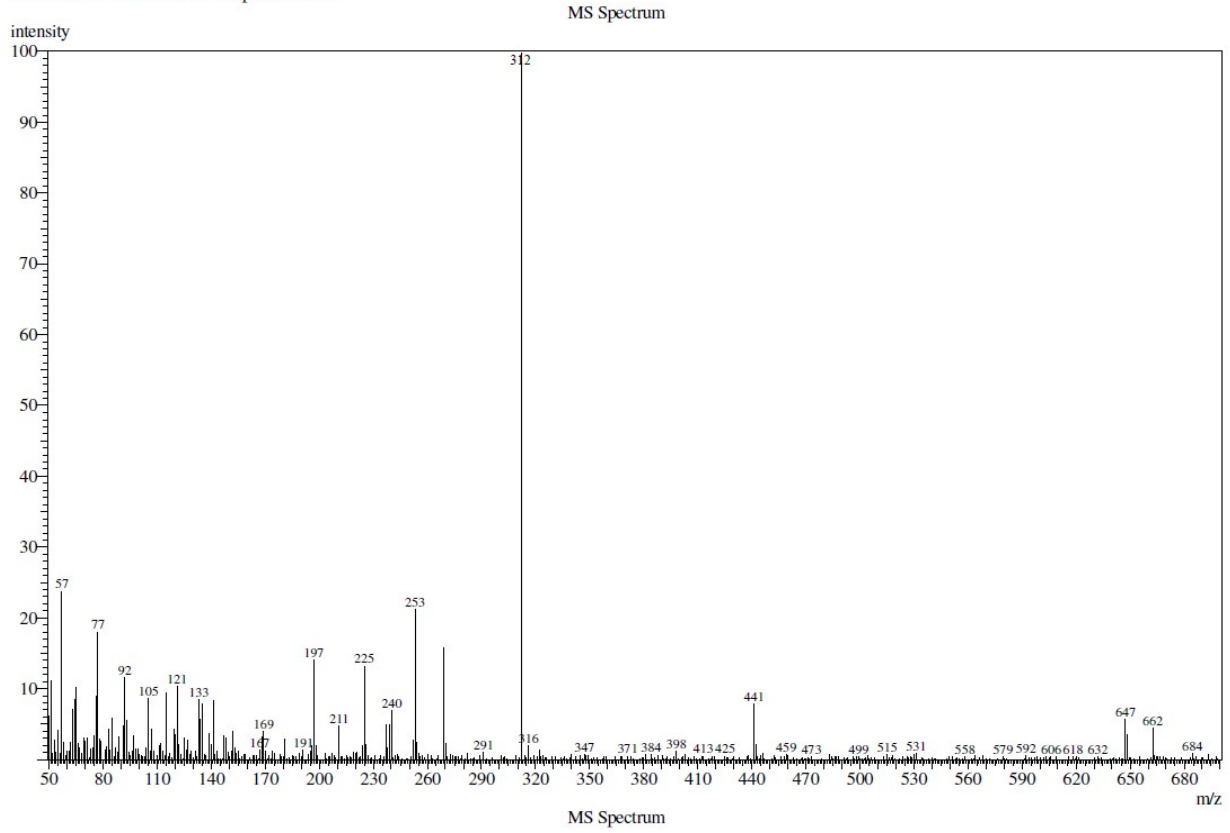

# <sup>1</sup>H NMR Spectra (CDCl<sub>3</sub>) of 3e

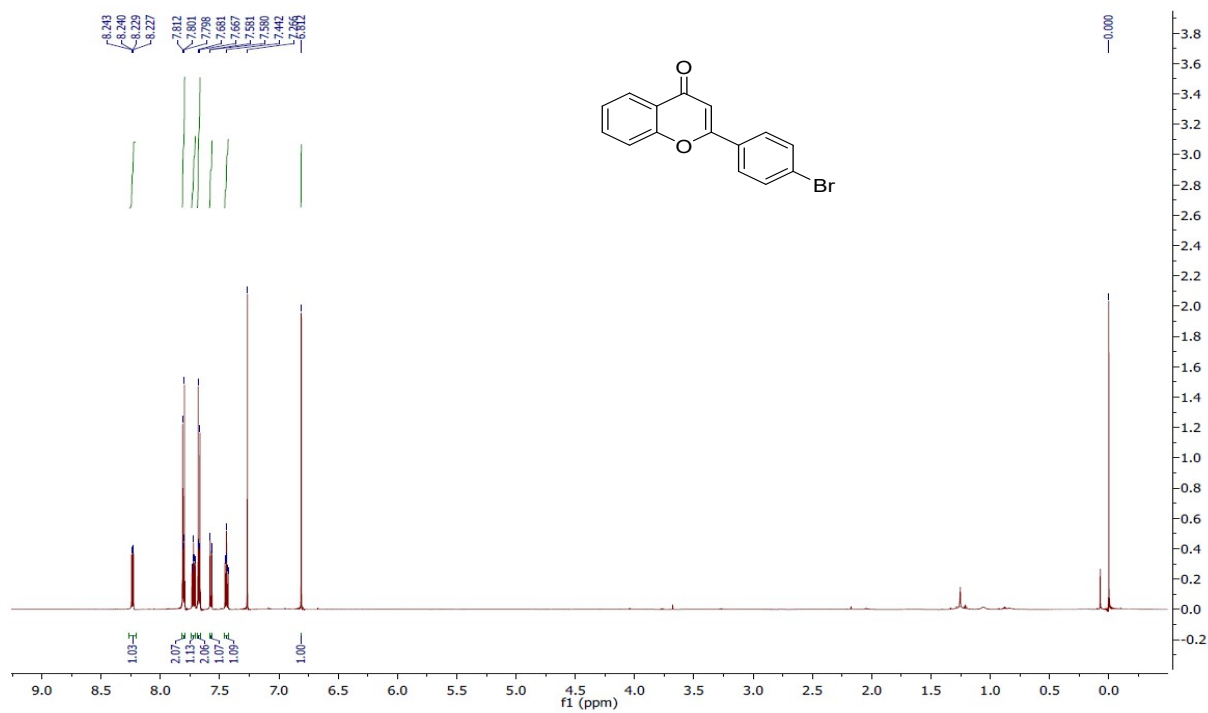

# <sup>13</sup>C NMR Spectra (CDCl<sub>3</sub>) of 3e

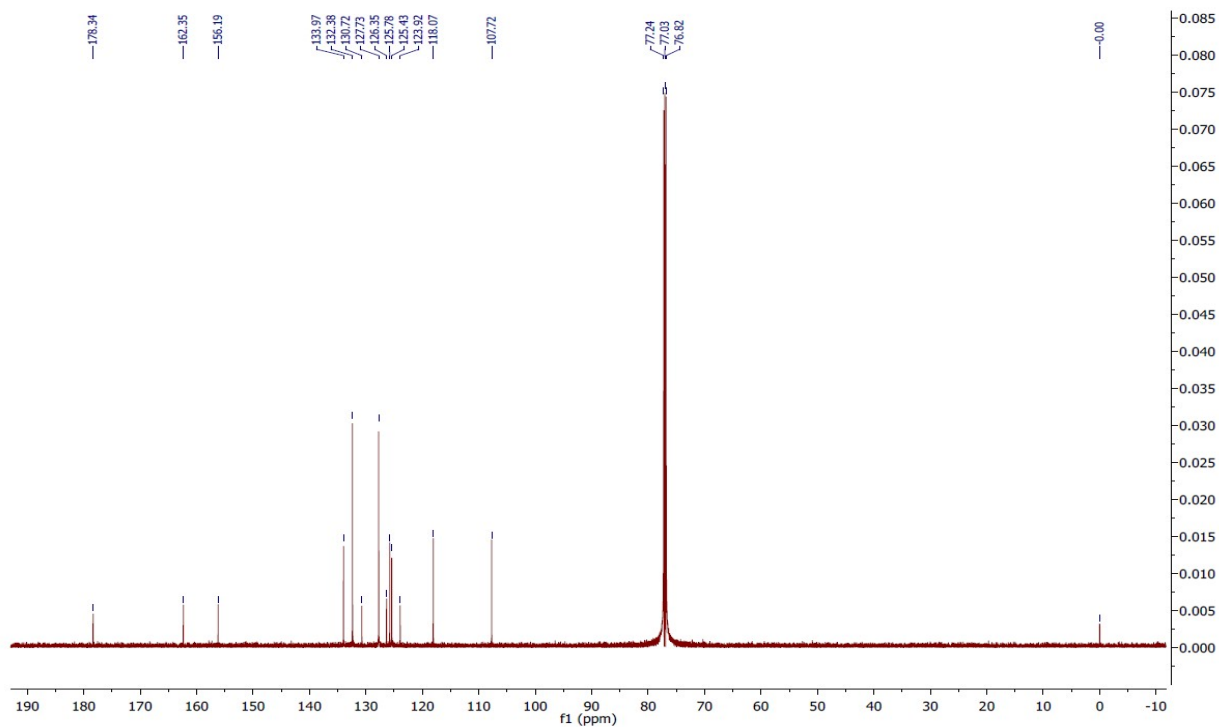

# Mass Spectra of 3e

Line#:1 R.Time:5.6050(Scan#:822)  
MassPeaks:605  
RawMode:Averaged 5.6000-5.6100(821-823) BasePeak:120.1000(114197)  
BG Mode:Calc. from Peak Group 1 - Event 1

MS Spectrum

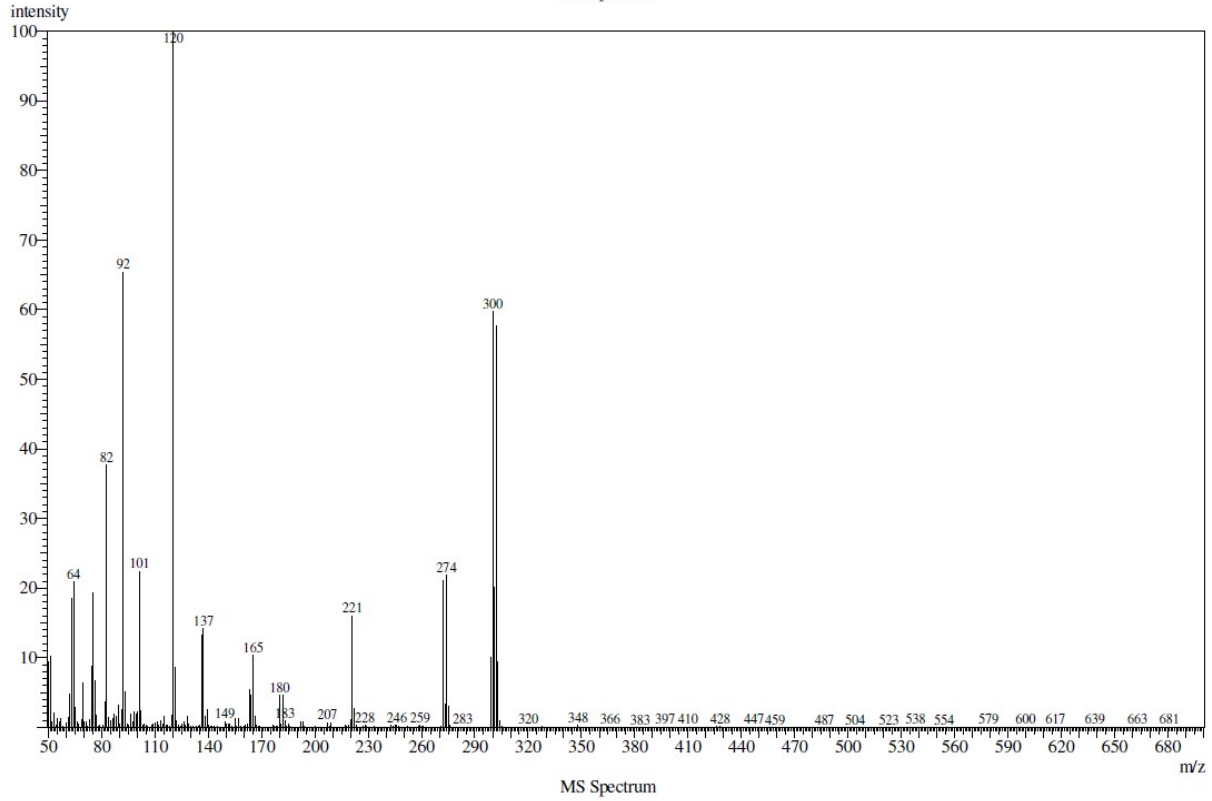

# <sup>1</sup>H NMR Spectra (CDCl<sub>3</sub>) of 3f

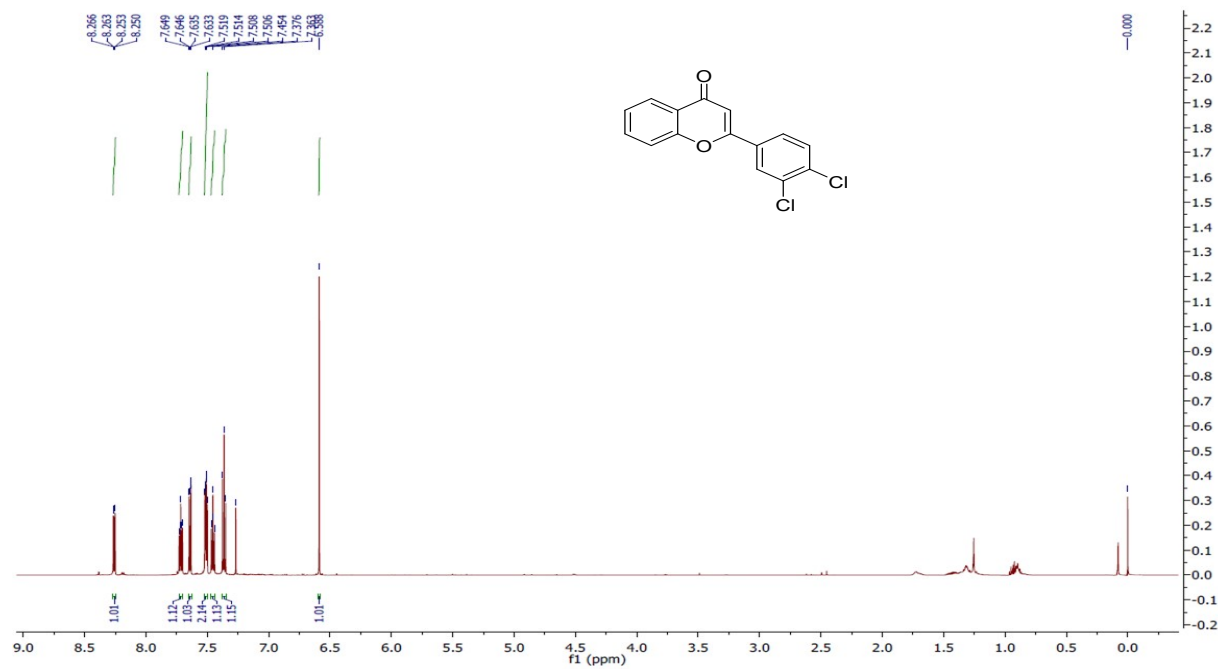

# <sup>13</sup>C NMR Spectra (CDCl<sub>3</sub>) of 3f

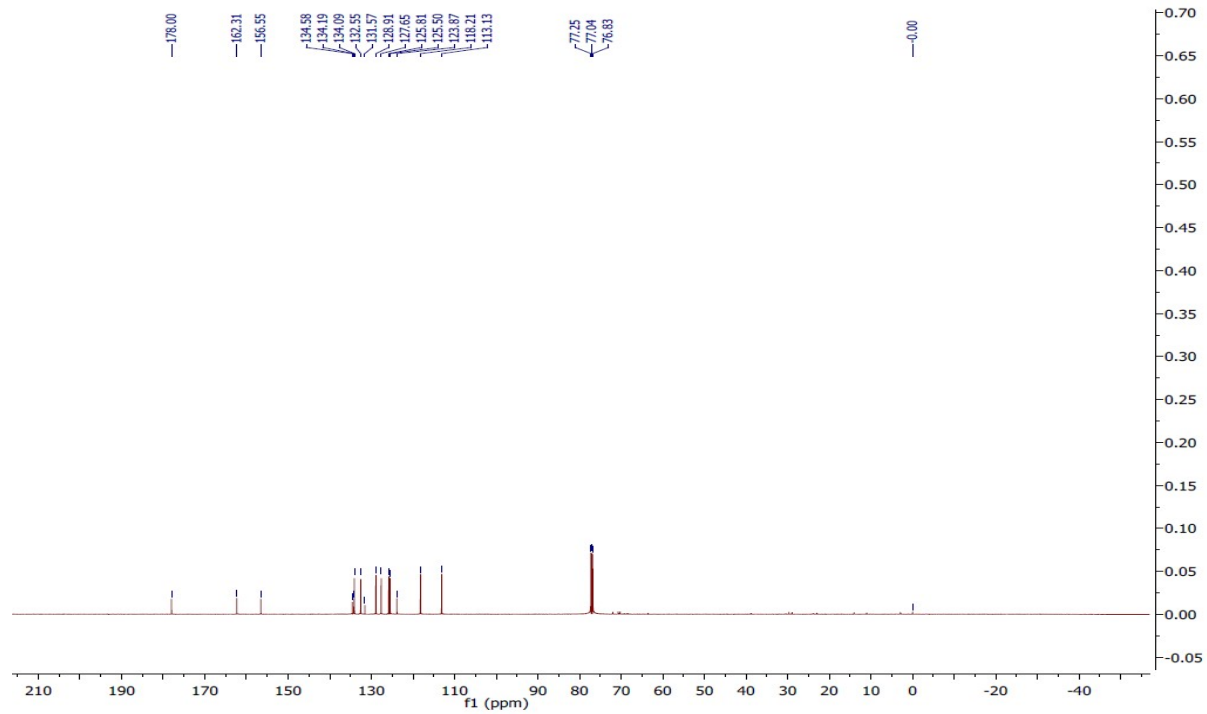

# Mass Spectra of 3f

Line#:1 R.Time:5.0100(Scan#:703)  
MassPeaks:470  
RawMode:Averaged 5.0050-5.0150(702-704) BasePeak:290.0000(3702)  
BG Mode:Calc. from Peak Group 1 - Event 1

MS Spectrum

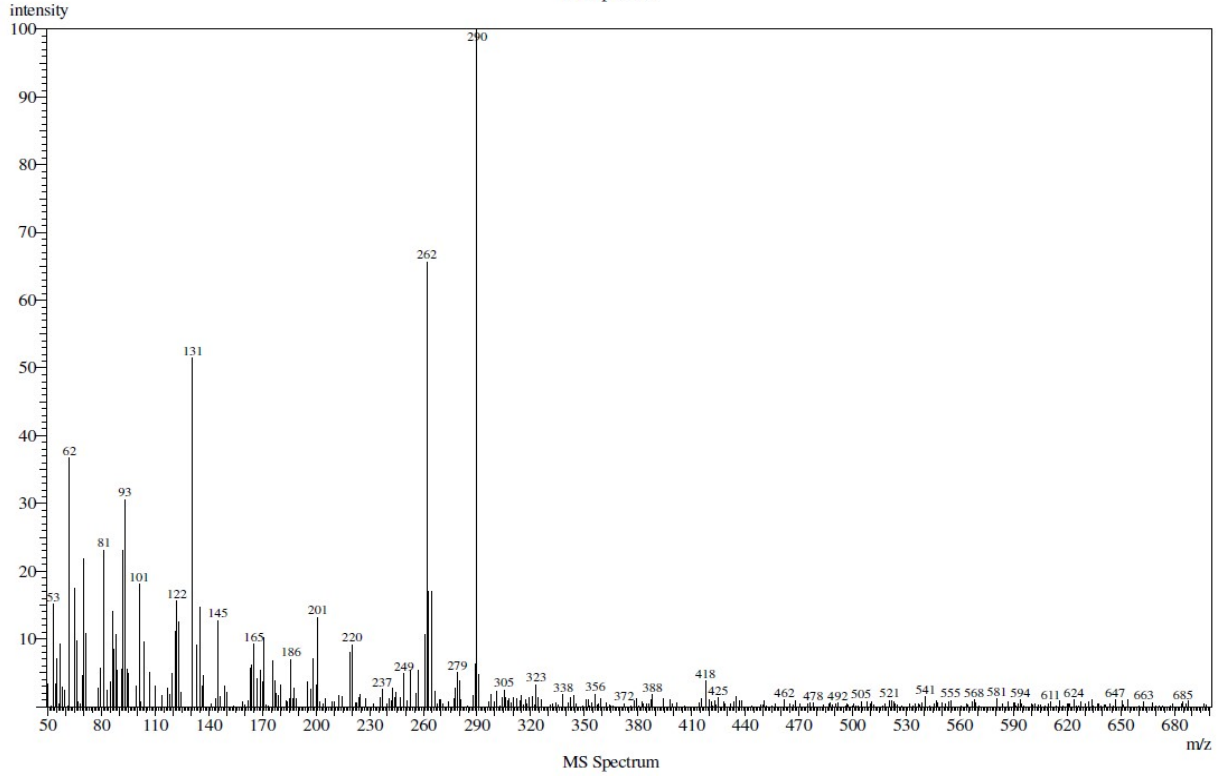



# <sup>1</sup>H NMR Spectra (CDCl<sub>3</sub>) of 3g

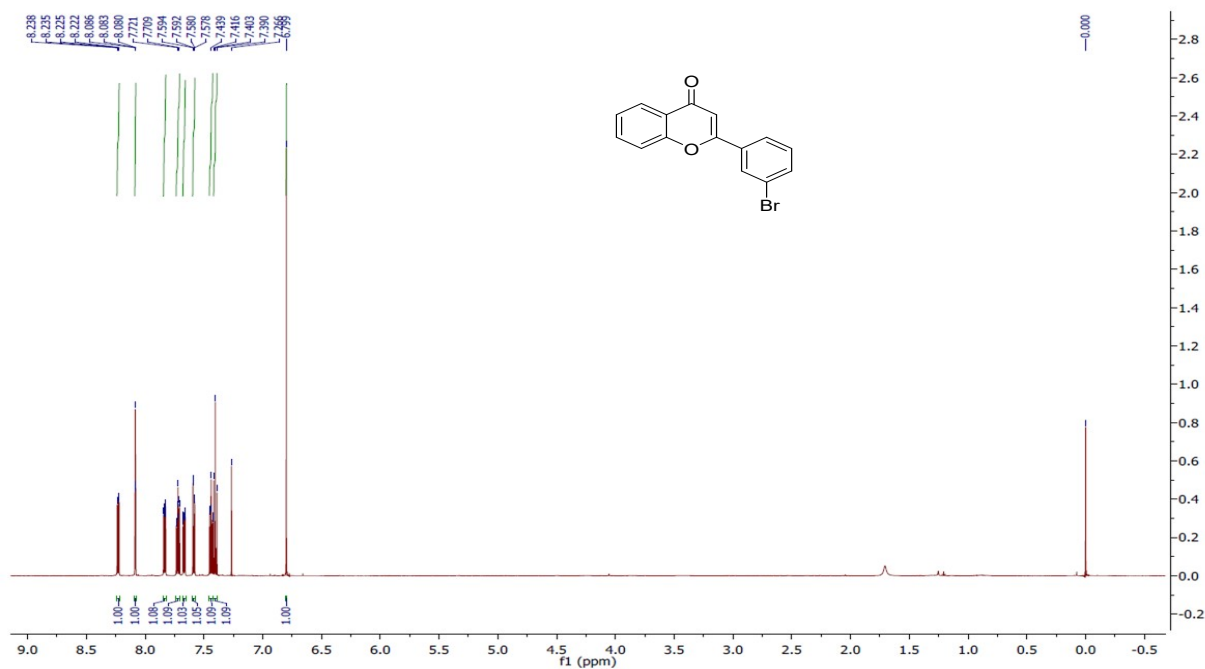

# <sup>13</sup>C NMR Spectra (CDCl<sub>3</sub>) of 3g

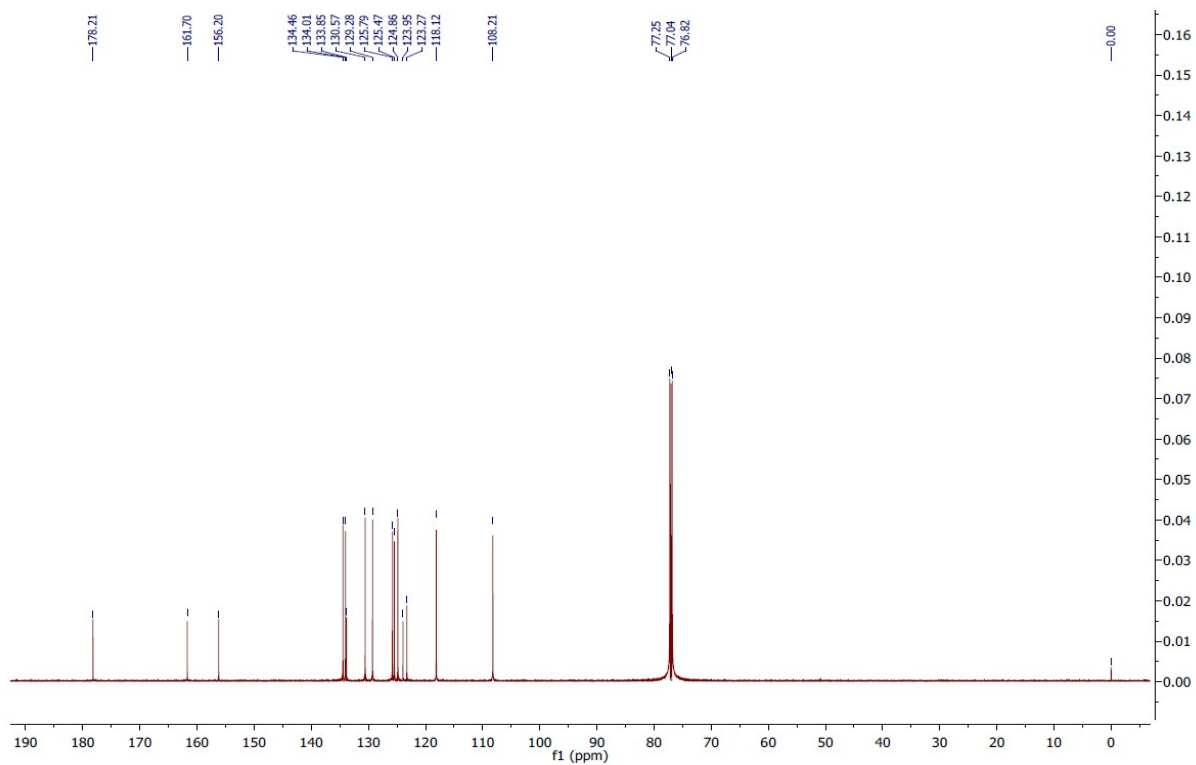

# Mass Spectra of 3g

Line#: 1 R.Time: 5.3750(Scan#: 776)  
MassPeaks: 577  
RawMode: Averaged 5.3700-5.3800(775-777) BasePeak: 120.0500(526009)  
BG Mode: Calc. from Peak Group 1 - Event 1

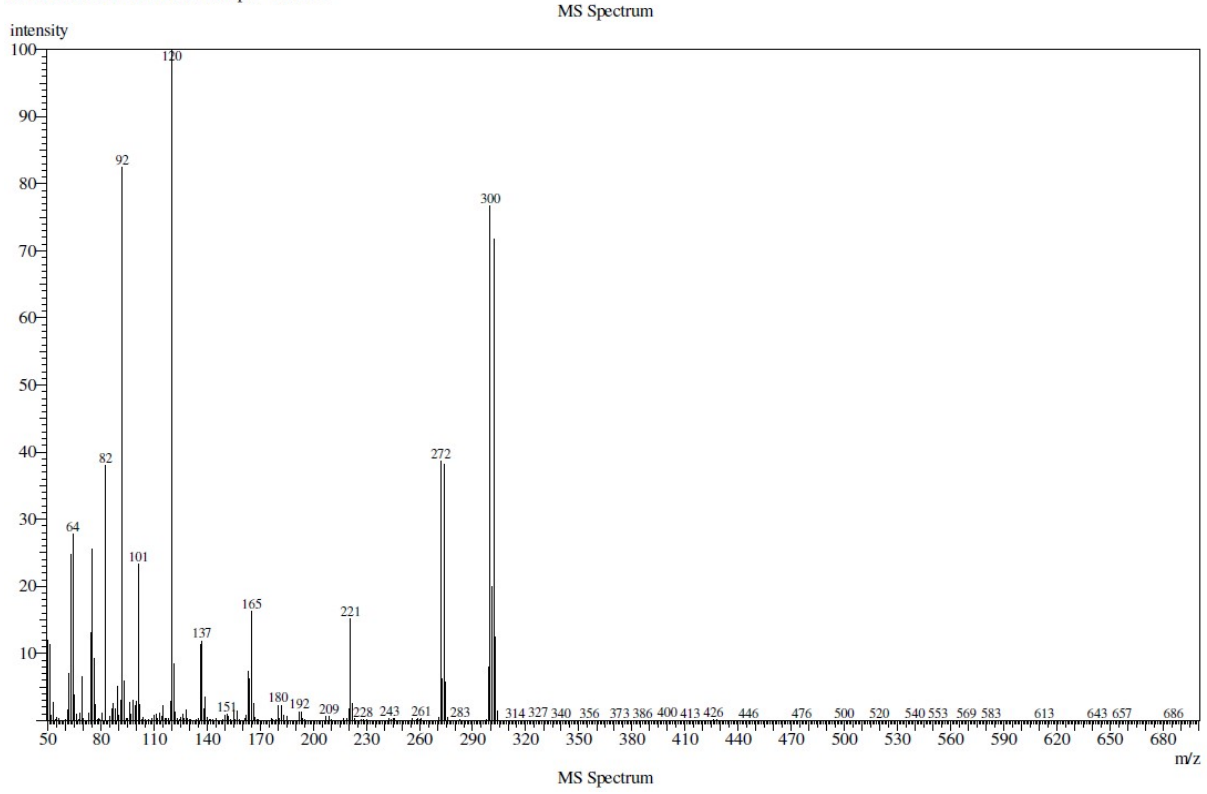

# <sup>1</sup>H NMR Spectra (CDCl<sub>3</sub>) of 3h

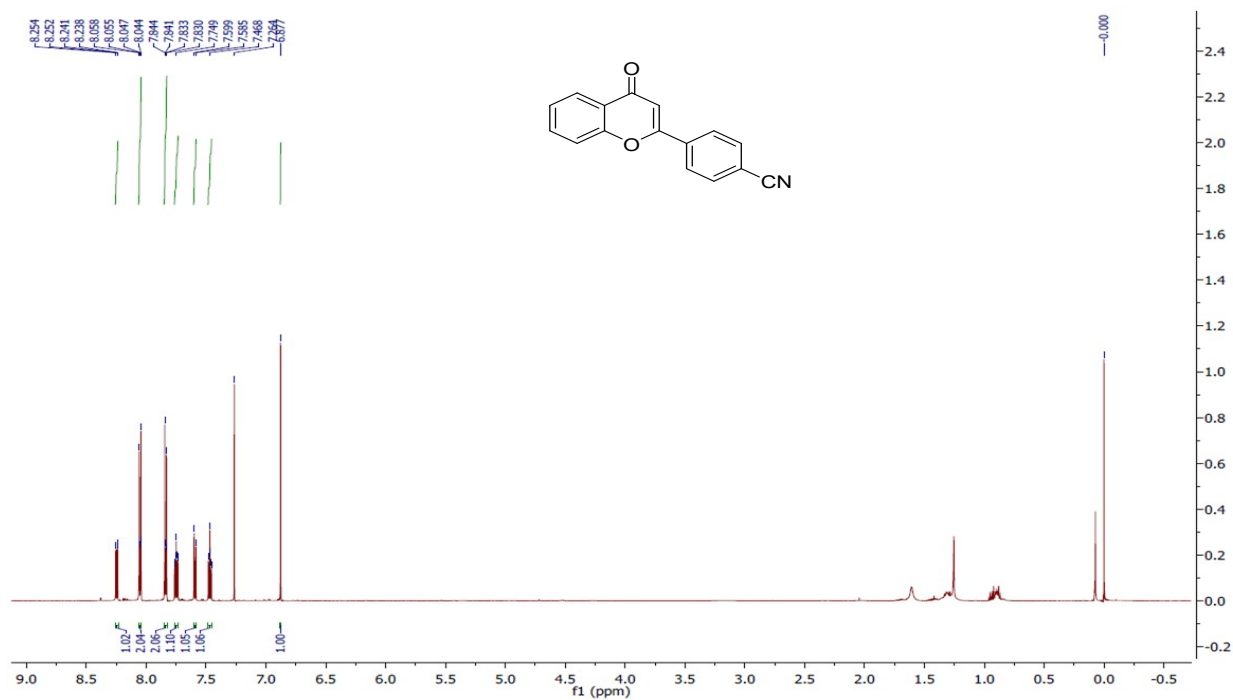

# <sup>13</sup>C NMR Spectra (CDCl<sub>3</sub>) of 3h

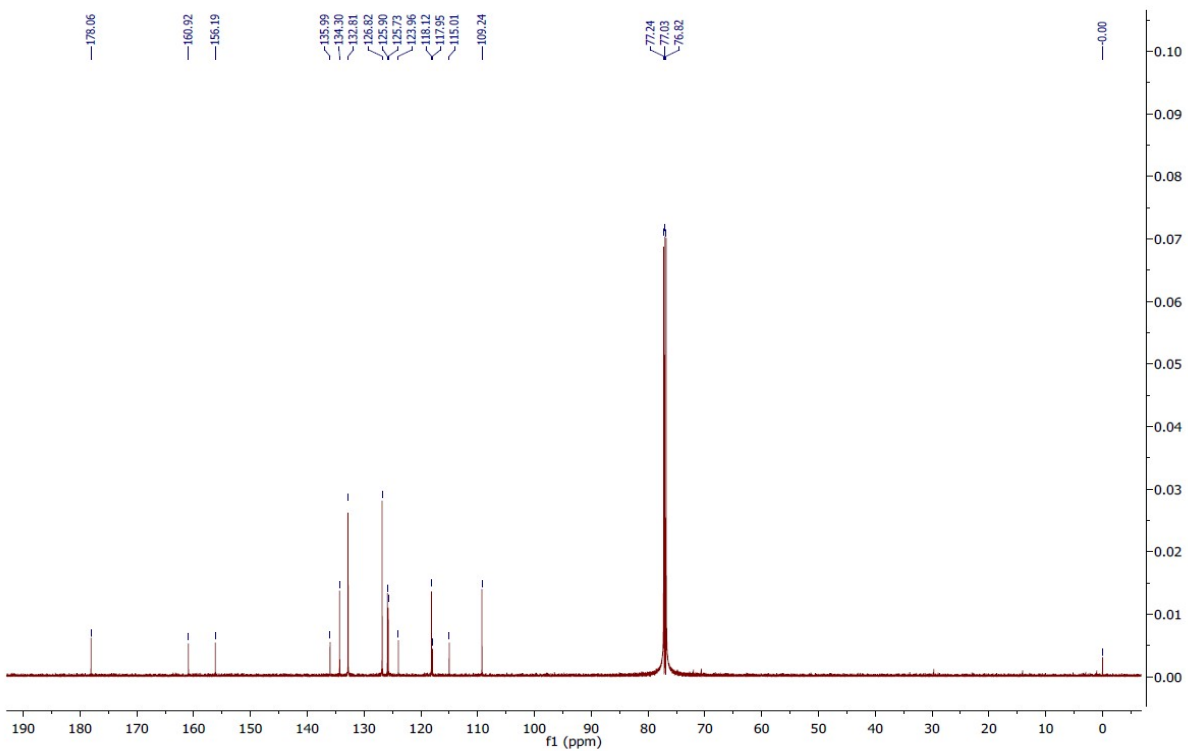

# Mass Spectra of 3h

Line#:1 R.Time:3.8750(Scan#:476)  
MassPeaks:511  
RawMode:Averaged 3.8700-3.8800(475-477) BasePeak:120.0500(4116)  
BG Mode:Calc. from Peak Group 1 - Event 1

MS Spectrum

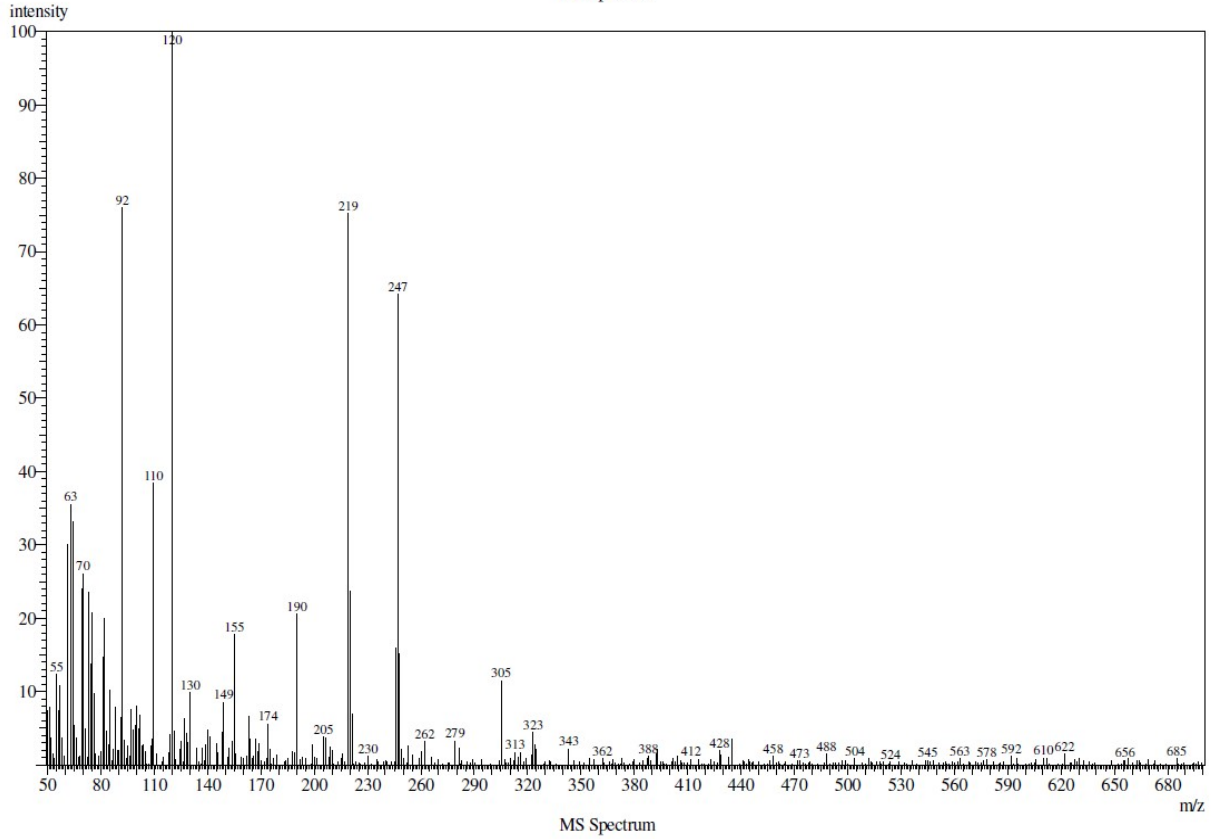

# <sup>1</sup>H NMR Spectra (CDCl<sub>3</sub>) of 3i

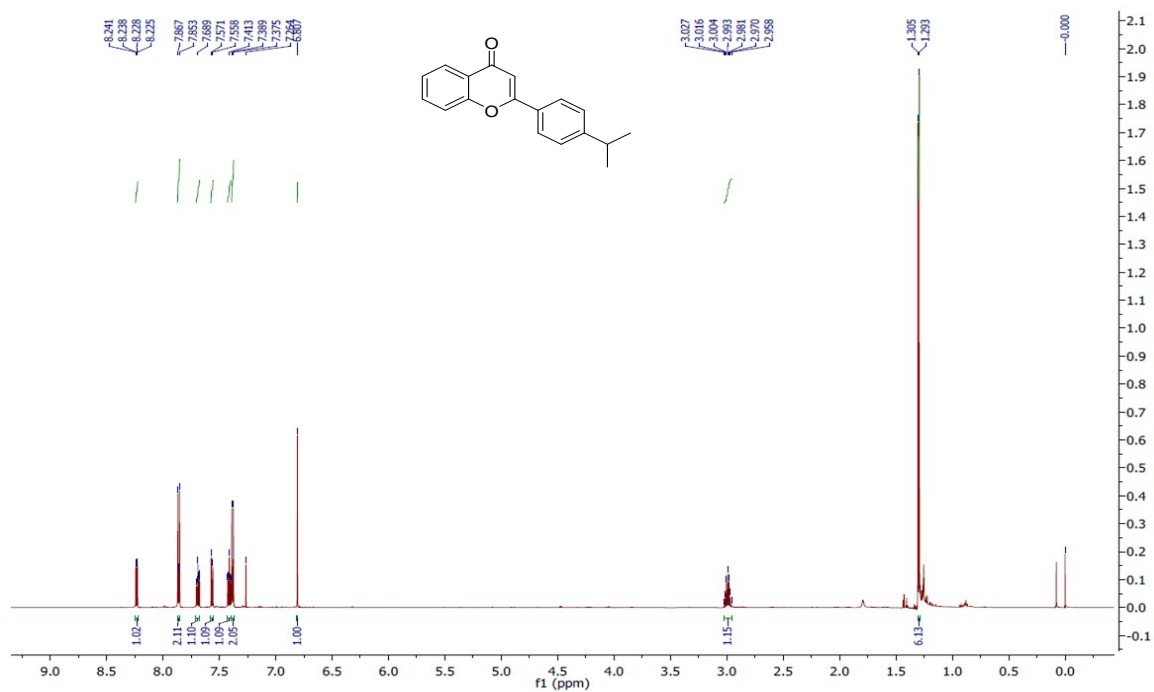

# <sup>13</sup>C NMR Spectra (CDCl<sub>3</sub>) of 3i

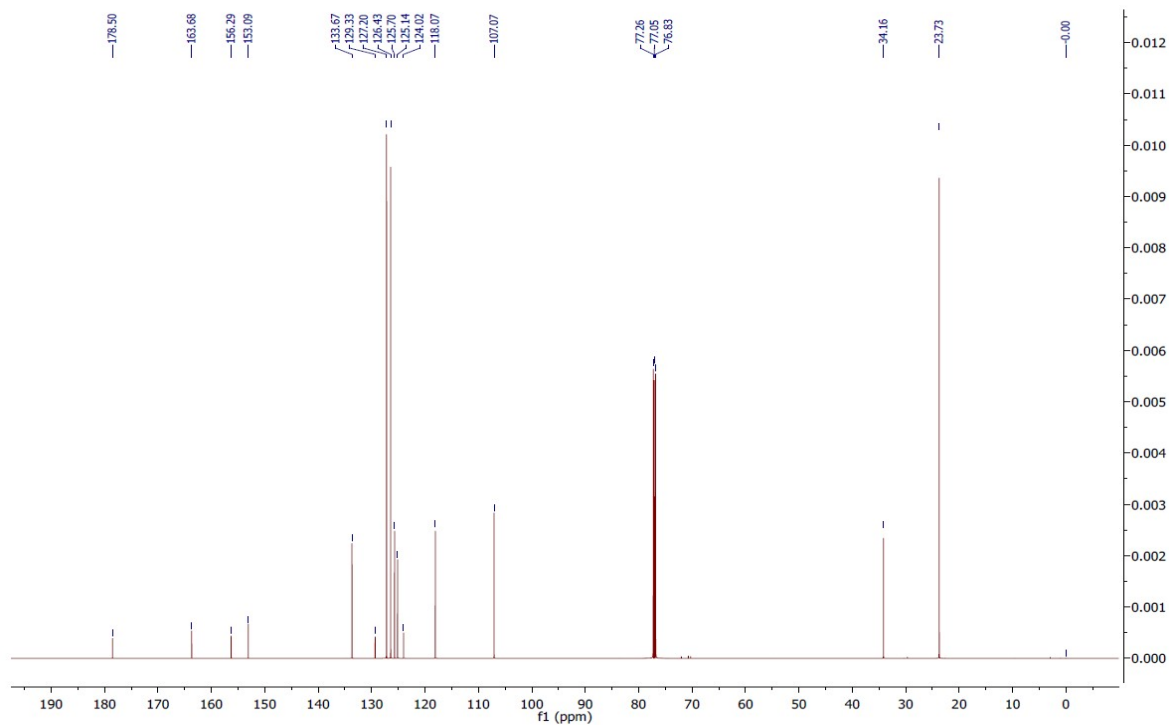

# Mass Spectra of 3i

Line#:1 R.Time:5.5700(Scan#:815)  
MassPeaks:590  
RawMode:Averaged 5.5650-5.5750(814-816) BasePeak:249.0500(2079753)  
BG Mode:Calc. from Peak Group 1 - Event 1

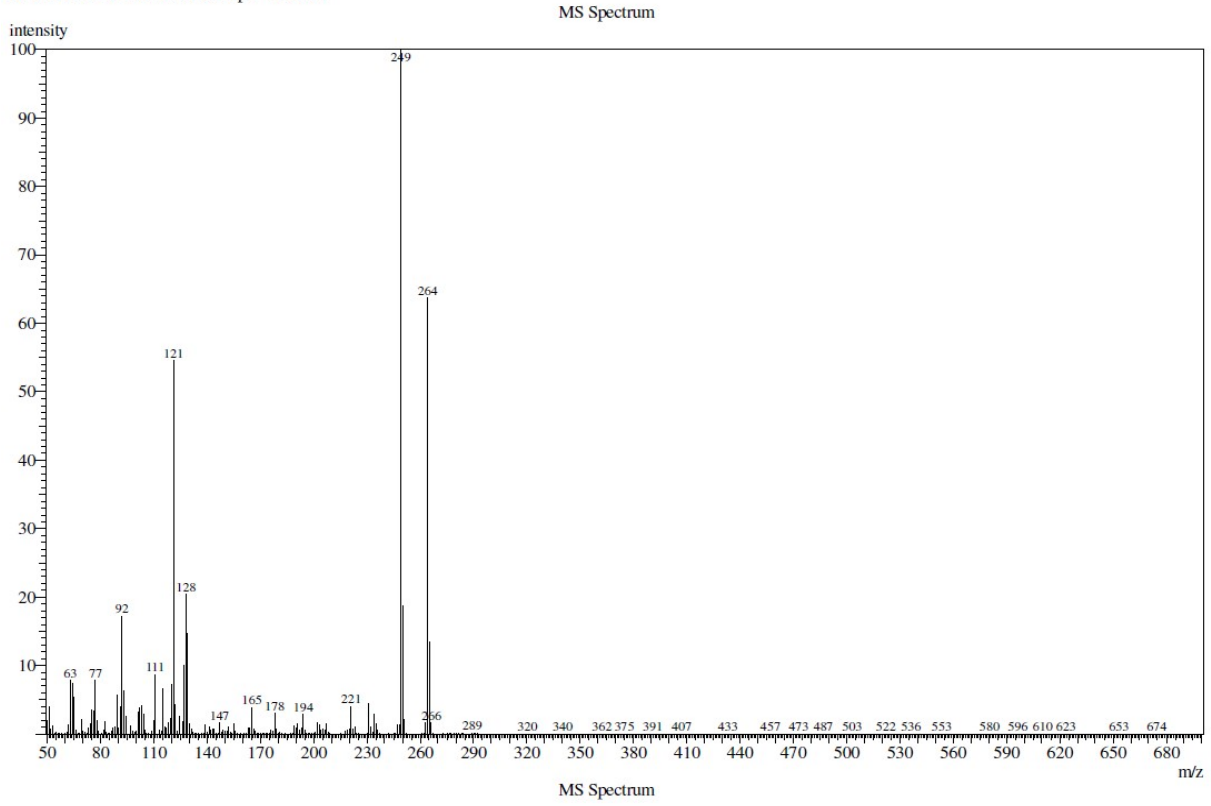

### <sup>1</sup>H NMR Spectra (DMSO) of 3j

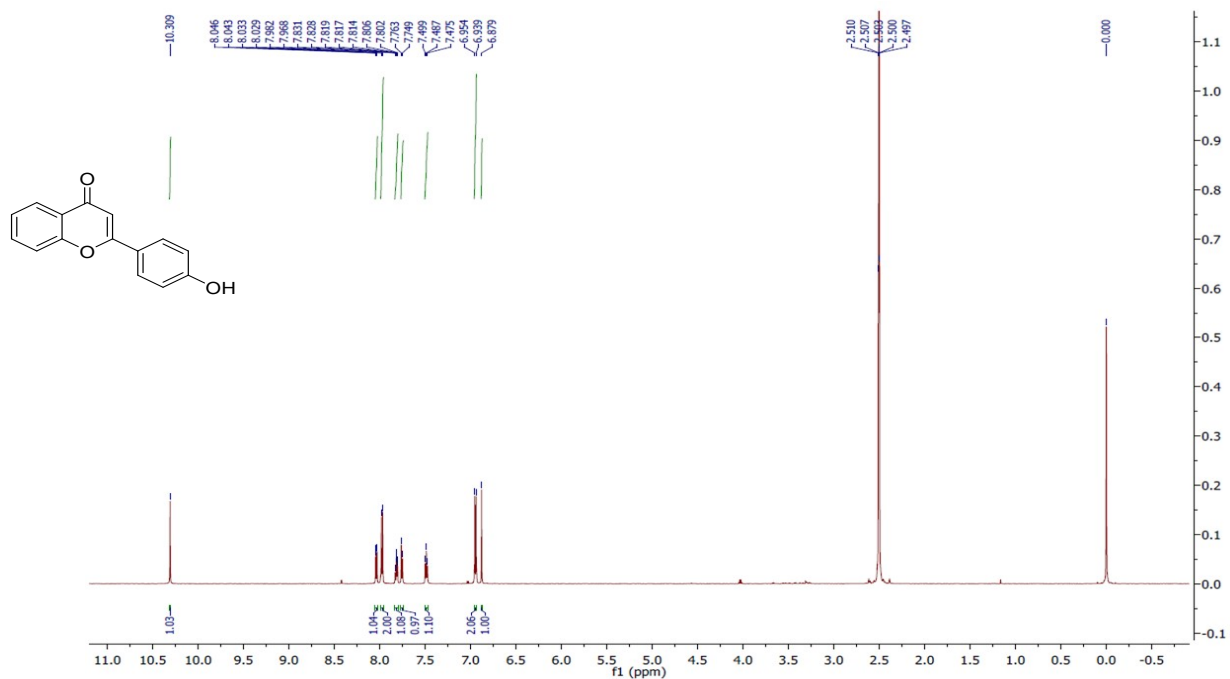

### <sup>13</sup>C NMR Spectra (DMSO) of 3j

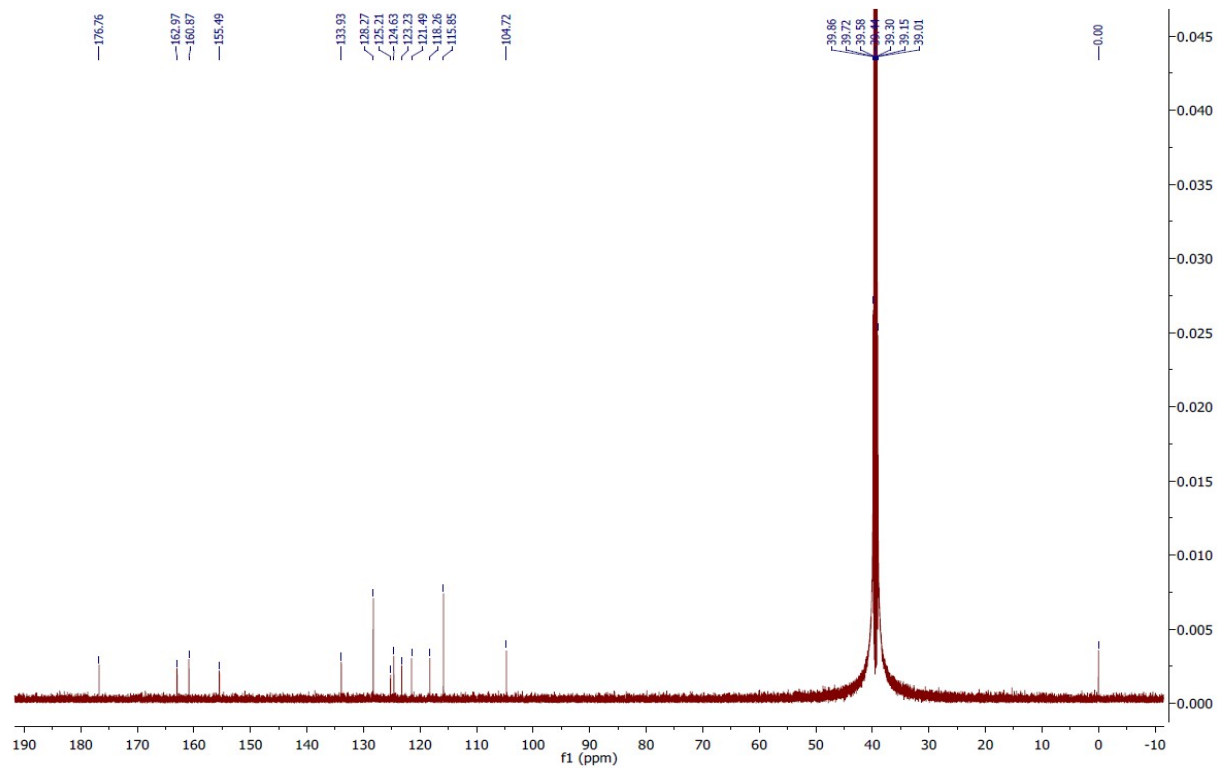

# Mass Spectra of 3j

Line#:2 R.Time:8.4100(Scan#:1383)  
MassPeaks:542  
RawMode:Averaged 8.4050-8.4150(1382-1384) BasePeak:238.1000(175416)  
BG Mode:Calc. from Peak Group 1 - Event 1

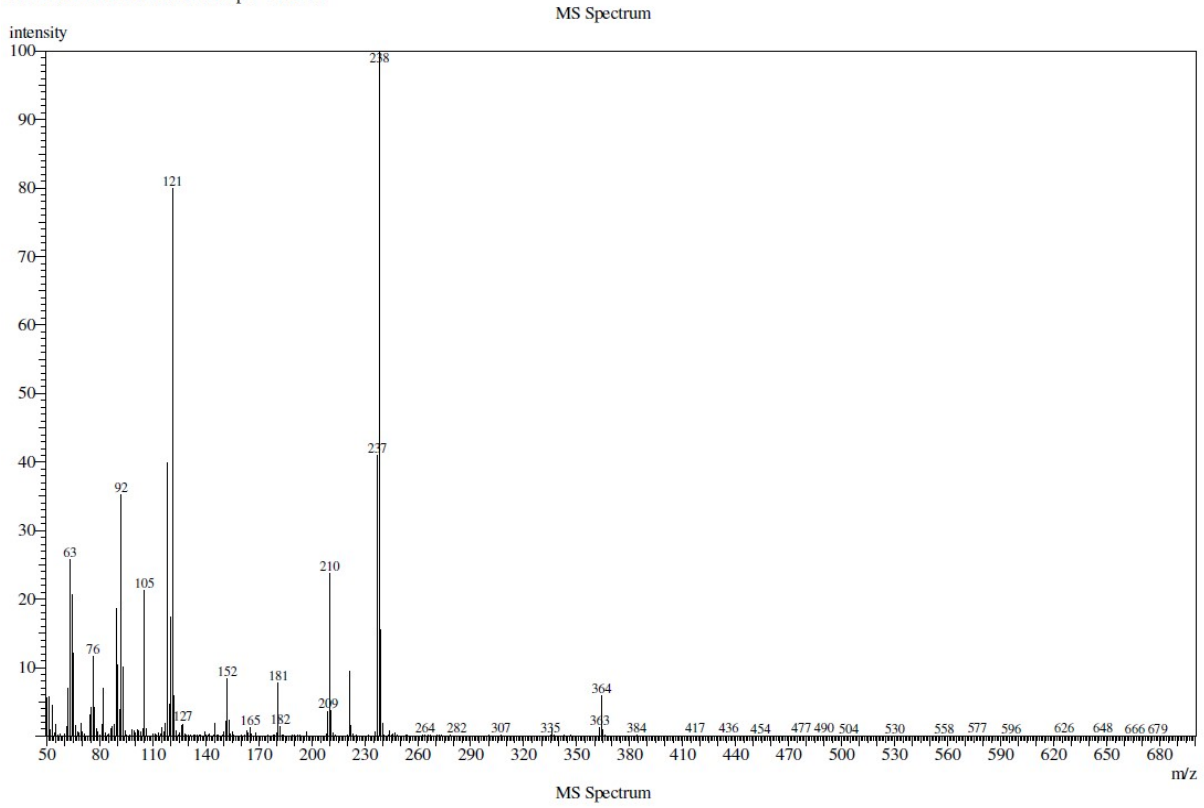



# <sup>1</sup>H NMR Spectra (DMSO) of 3k

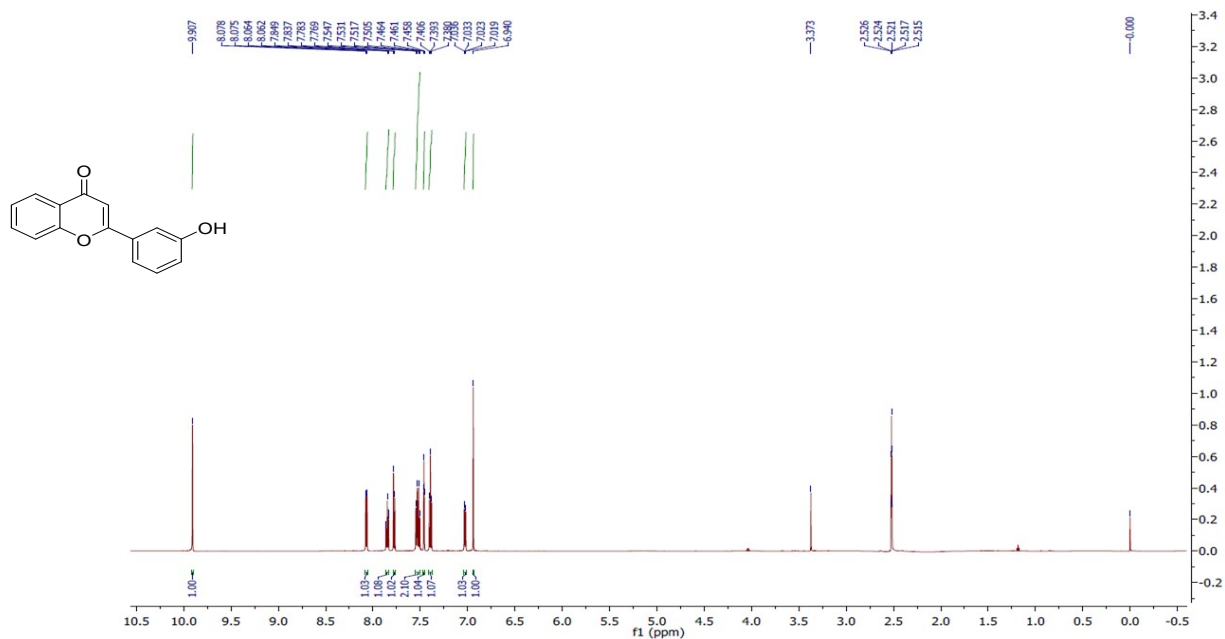

# <sup>13</sup>C NMR Spectra (DMSO) of 3k

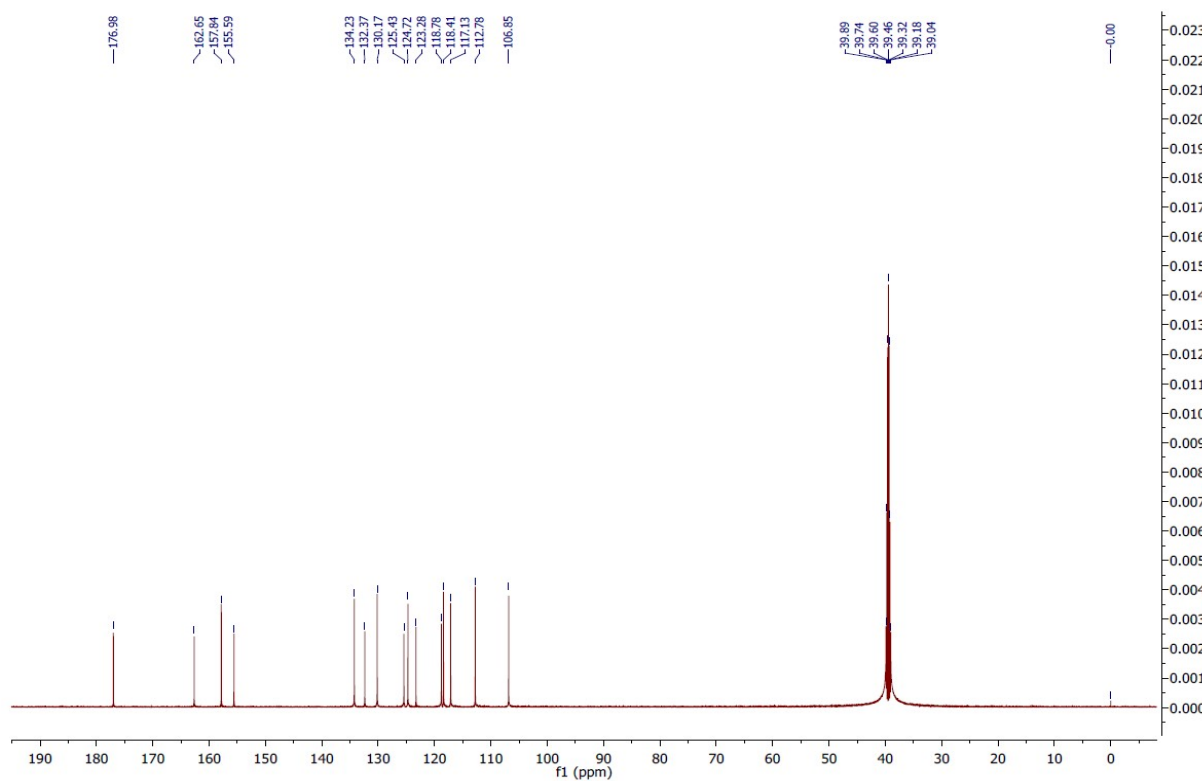

# Mass Spectra of 3k

Line#:1 R.Time:6.8700(Scan#:1075)  
MassPeaks:627  
RawMode:Averaged 6.8650-6.8750(1074-1076) BasePeak:238.1000(452376)  
BG Mode:Calc. from Peak Group 1 - Event 1

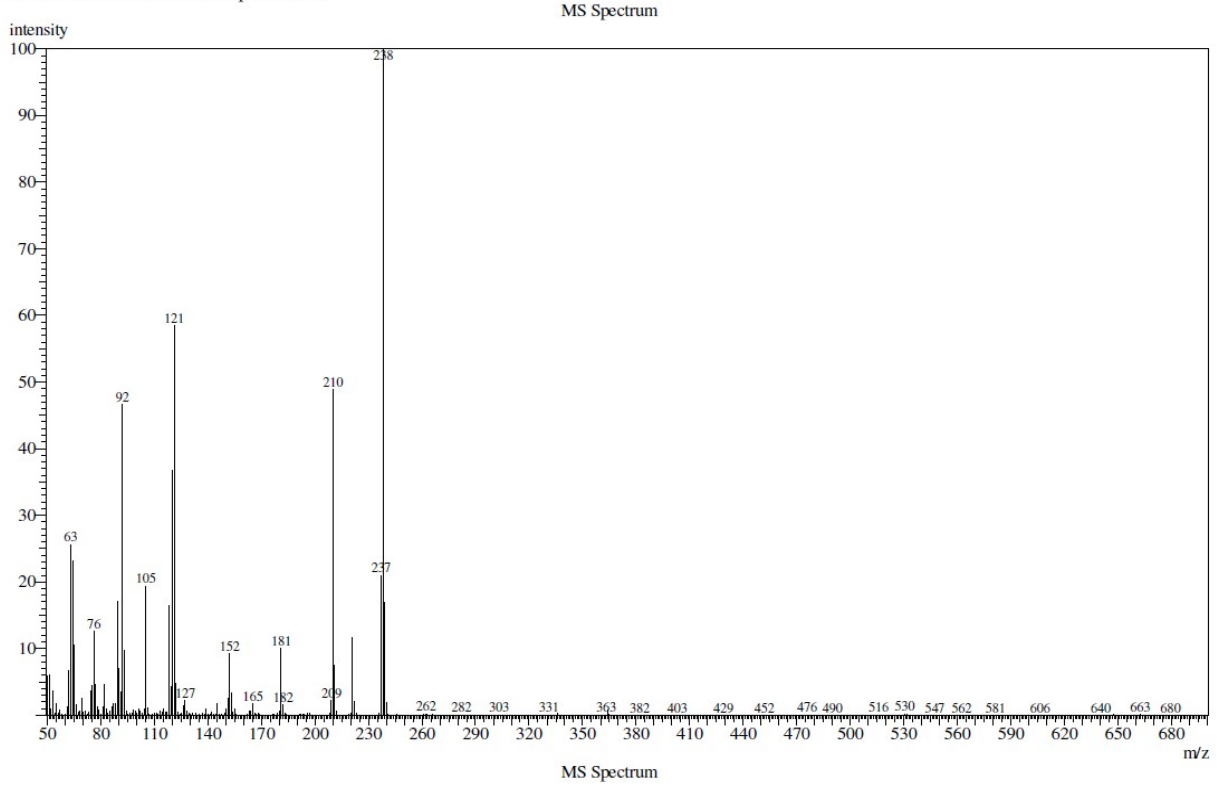

# <sup>1</sup>H NMR Spectra (DMSO) of 31

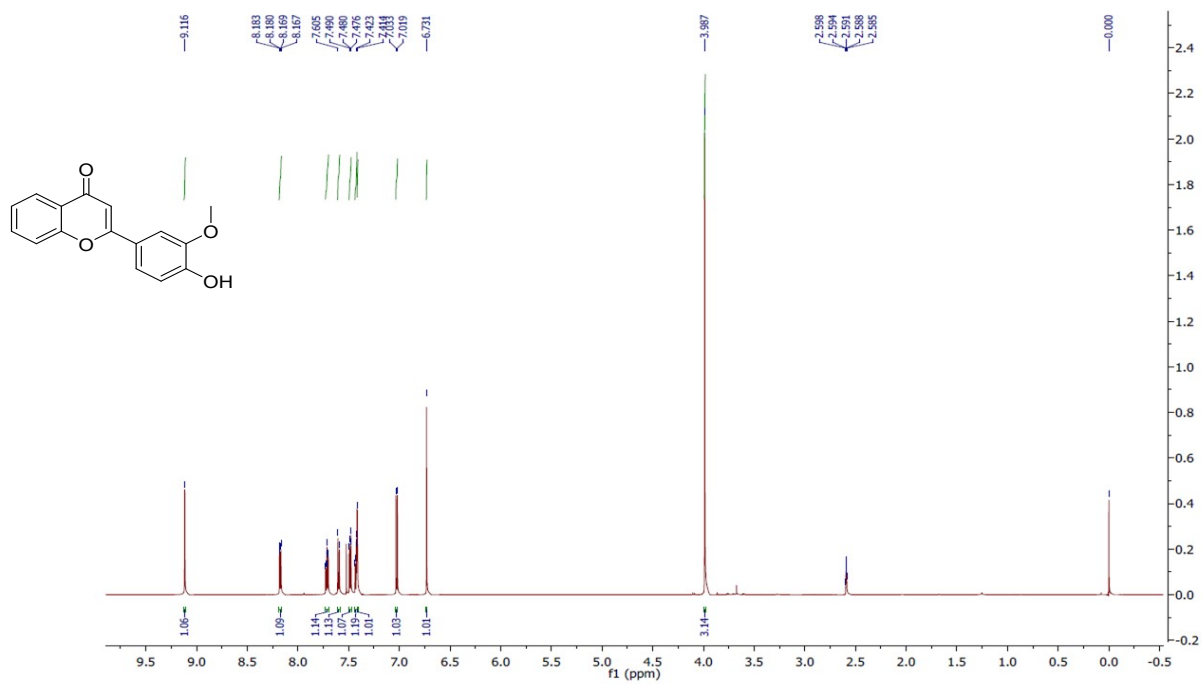

# <sup>13</sup>C NMR Spectra (DMSO) of 31

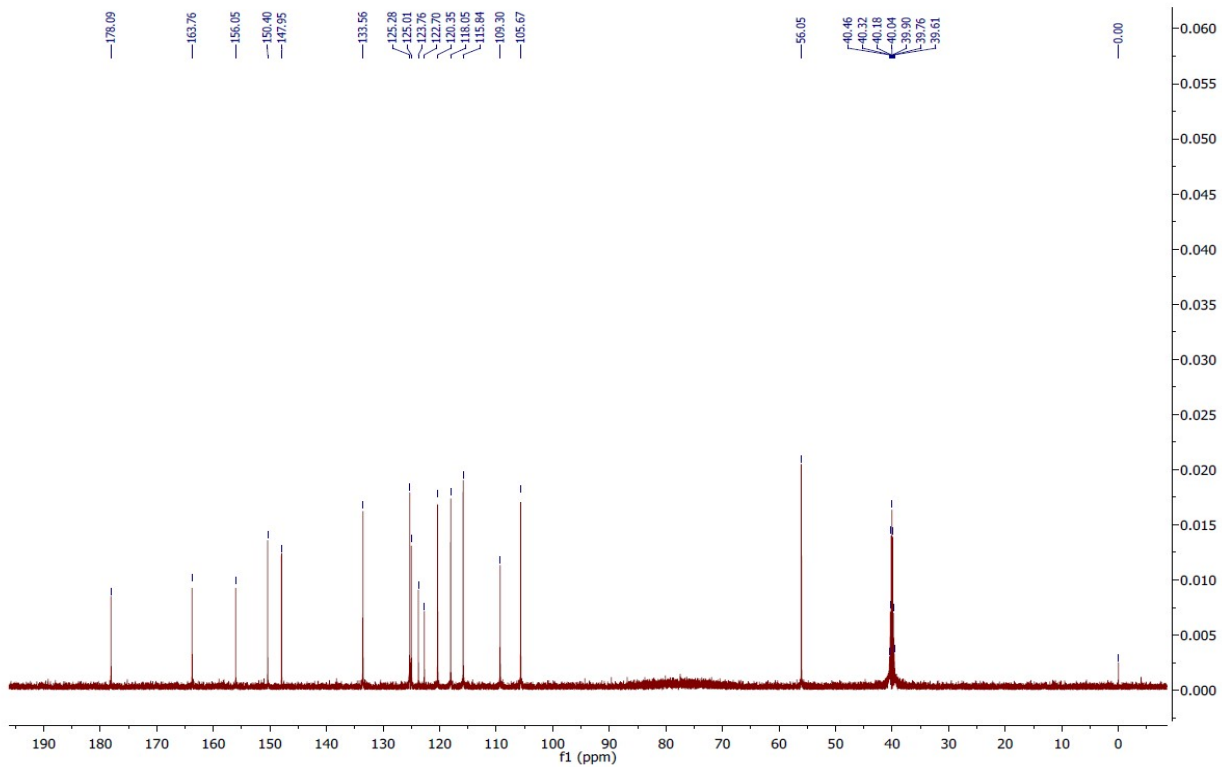

# Mass Spectra of 3I

Line#:1 R.Time:6.8700(Scan#:1075)

MassPeaks:627

RawMode:Averaged 6.8650-6.8750(1074-1076) BasePeak:238.1000(452376)

BG Mode:Calc. from Peak Group 1 - Event 1

MS Spectrum

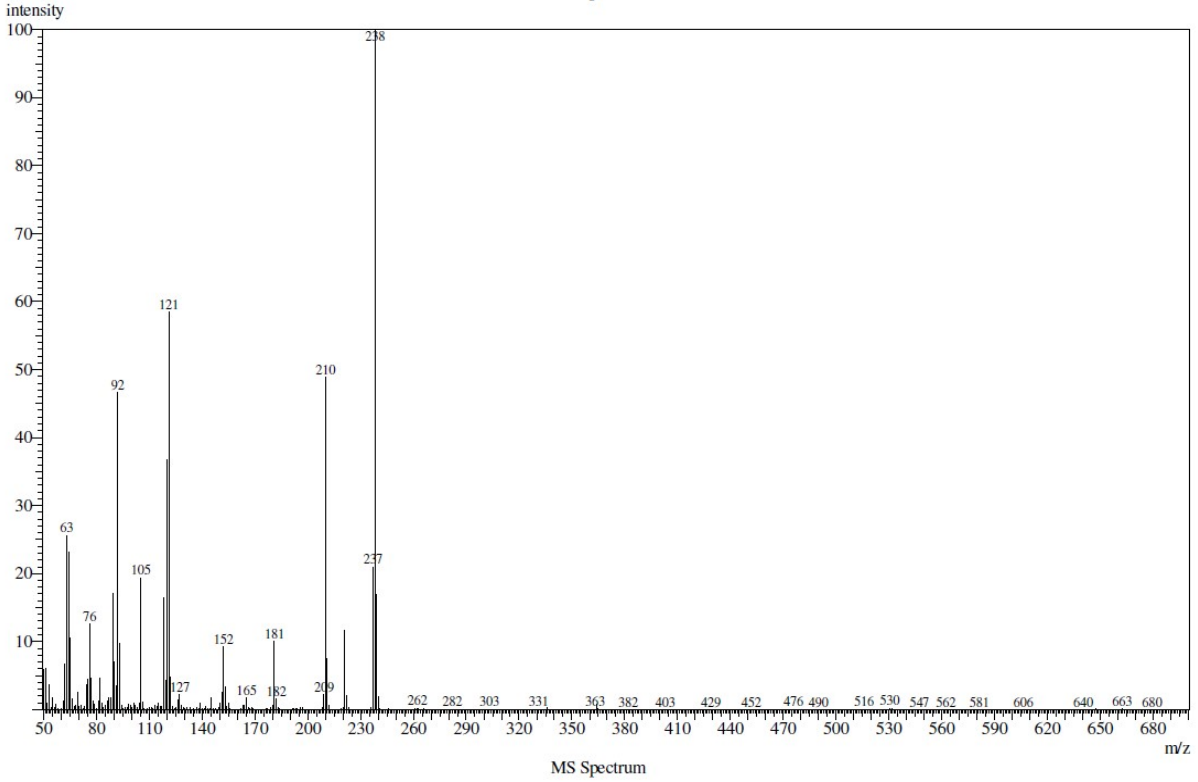

# <sup>1</sup>H NMR Spectra (DMSO) of 3m

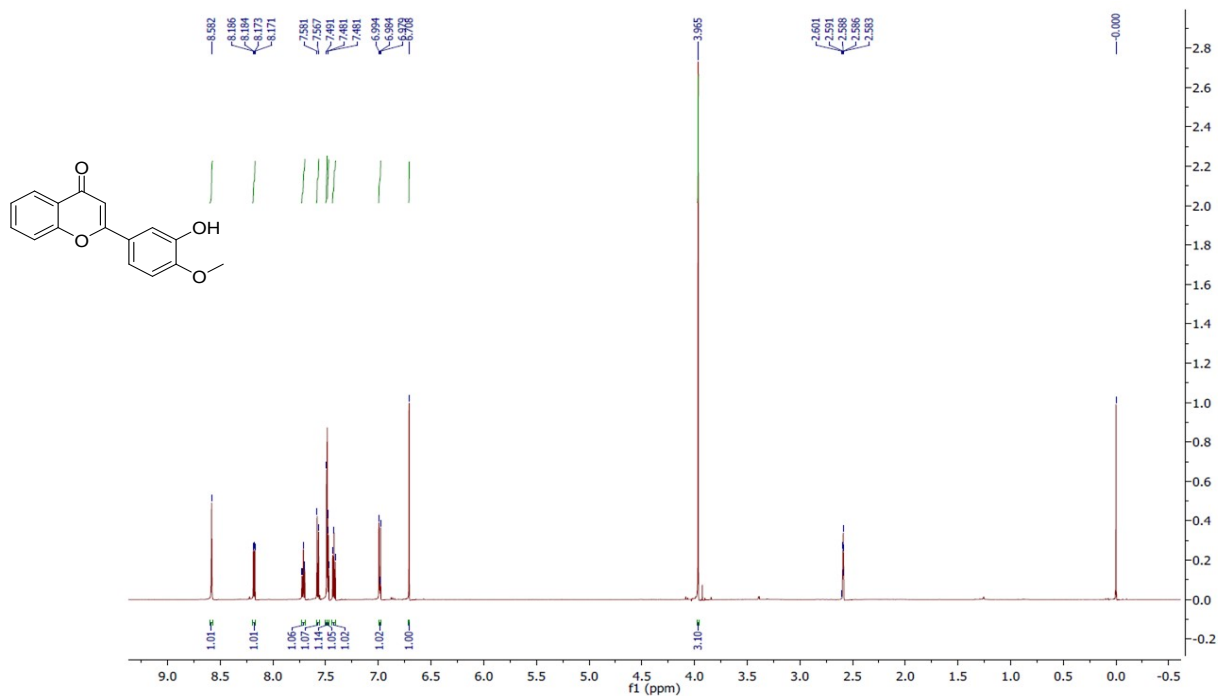

# <sup>13</sup>C NMR Spectra (DMSO) of 3m

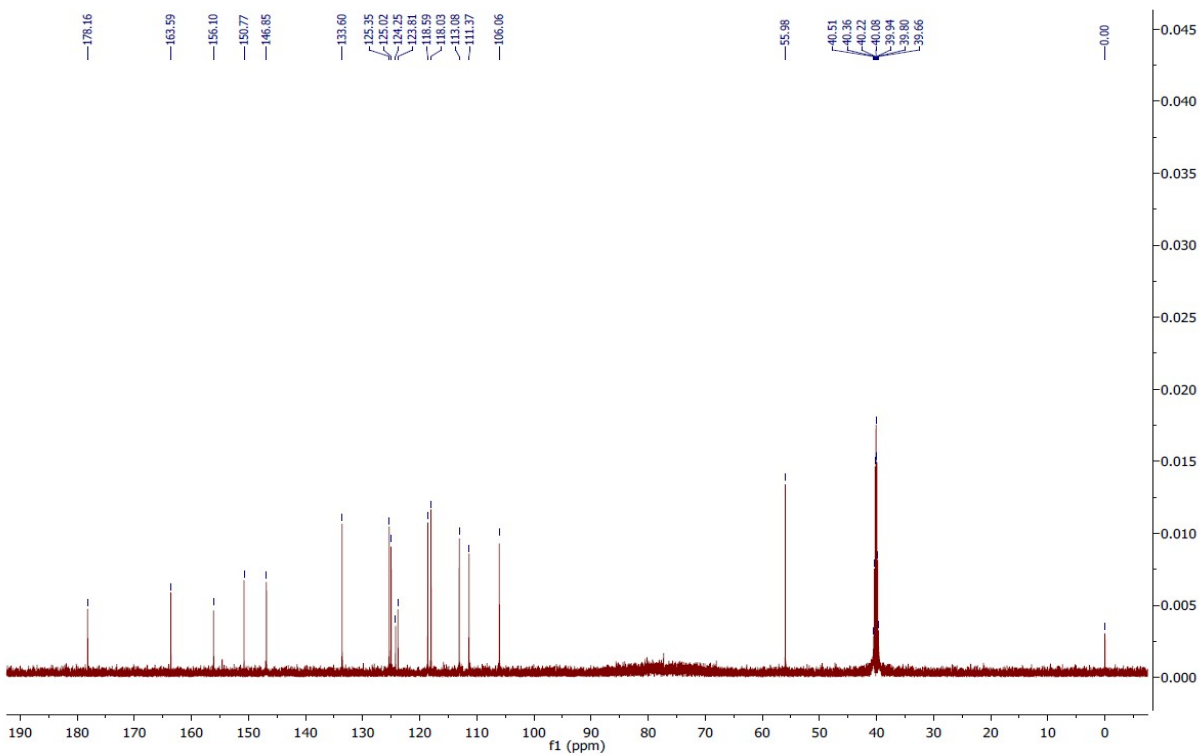

# Mass Spectra of 3m

Line#:2 R.Time:6.8550(Scan#:1072)  
MassPeaks:501  
RawMode:Averaged 6.8500-6.8600(1071-1073) BasePeak:268.0500(188016)  
BG Mode:Calc. from Peak Group 1 - Event 1

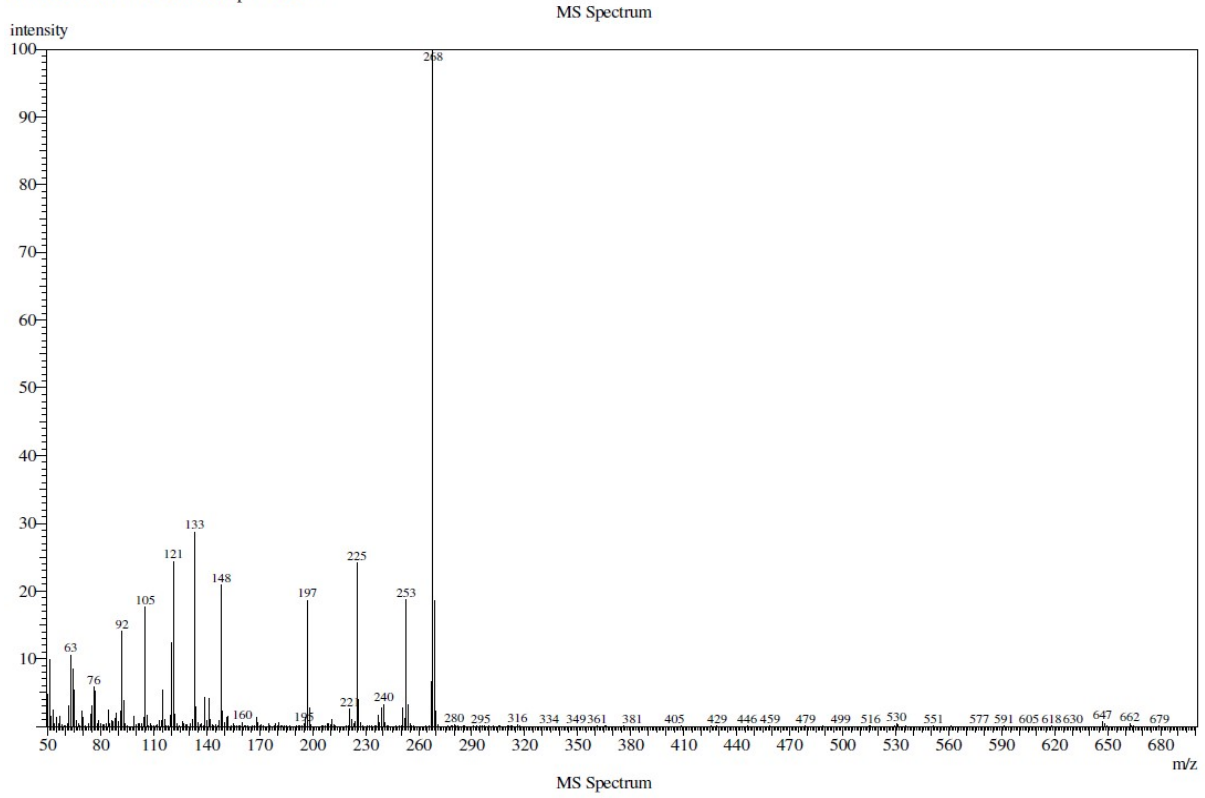

# <sup>1</sup>H NMR Spectra (DMSO) of 3n

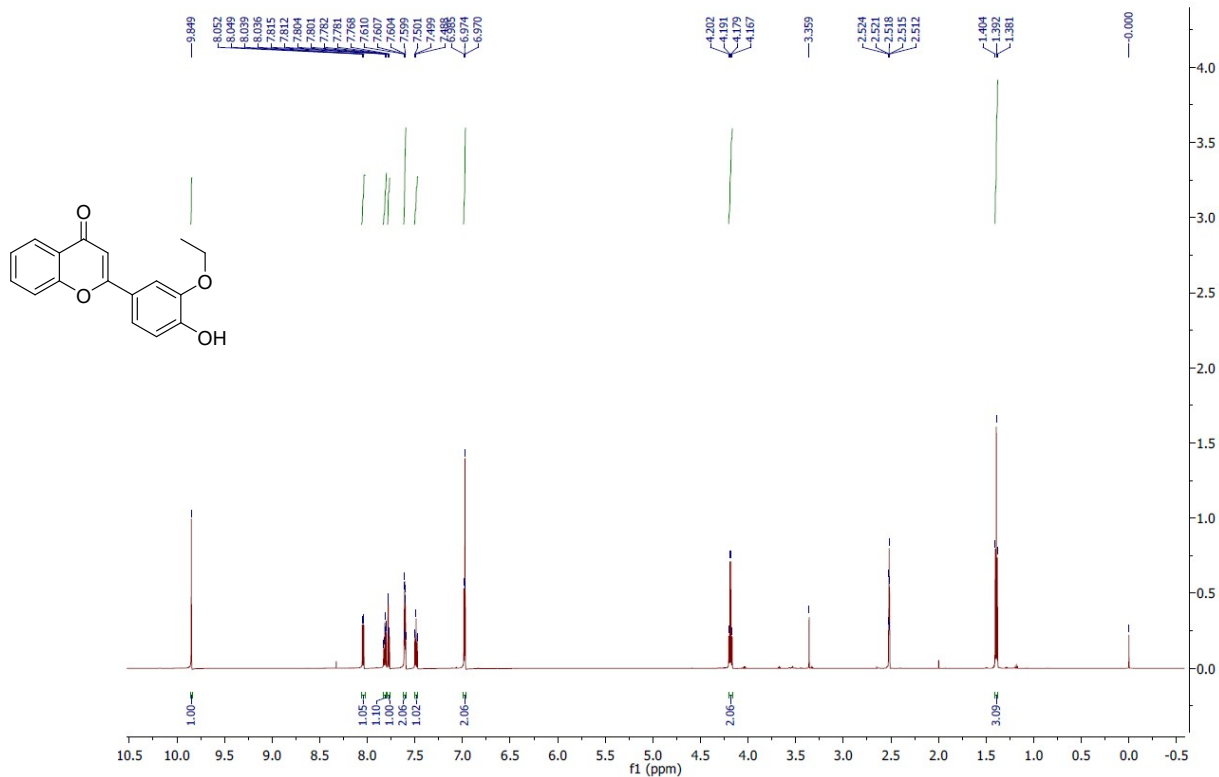

# <sup>13</sup>C NMR Spectra (DMSO) of 3n

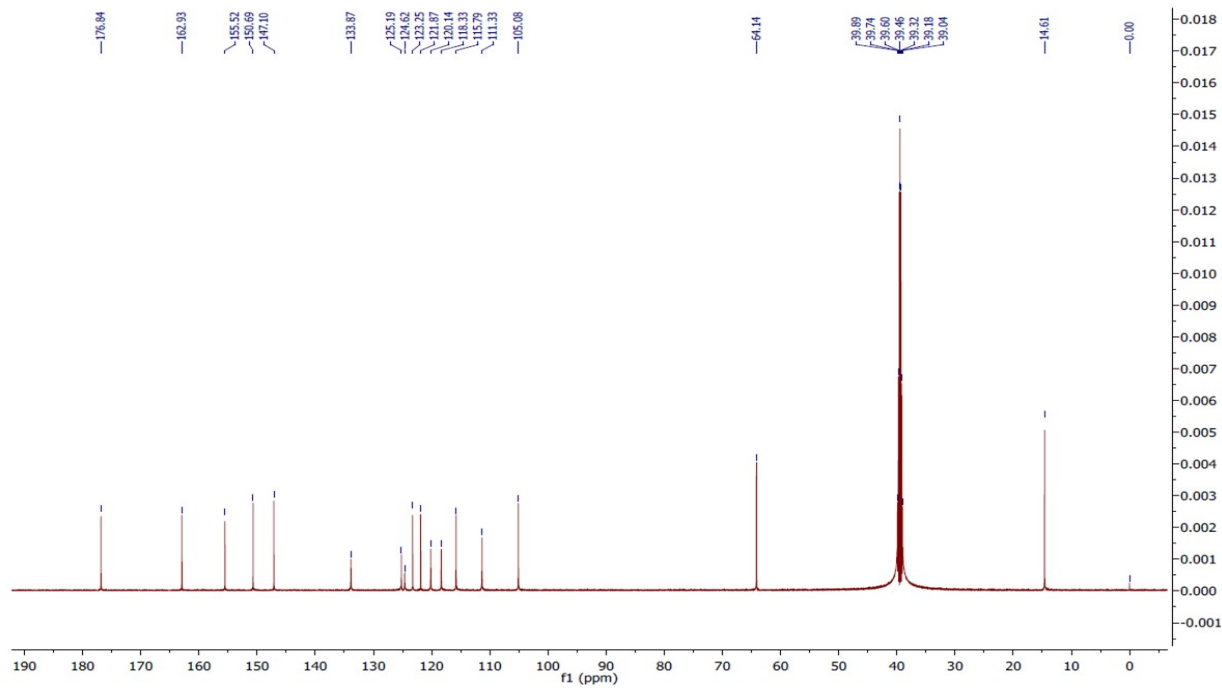

# Mass Spectra of 3n

Line#:1 R.Time:7.3800(Scan#:1177)

MassPeaks:621

RawMode:Averaged 7.3750-7.3850(1176-1178) BasePeak:282.1500(1742560)

BG Mode:Calc. from Peak Group 1 - Event 1

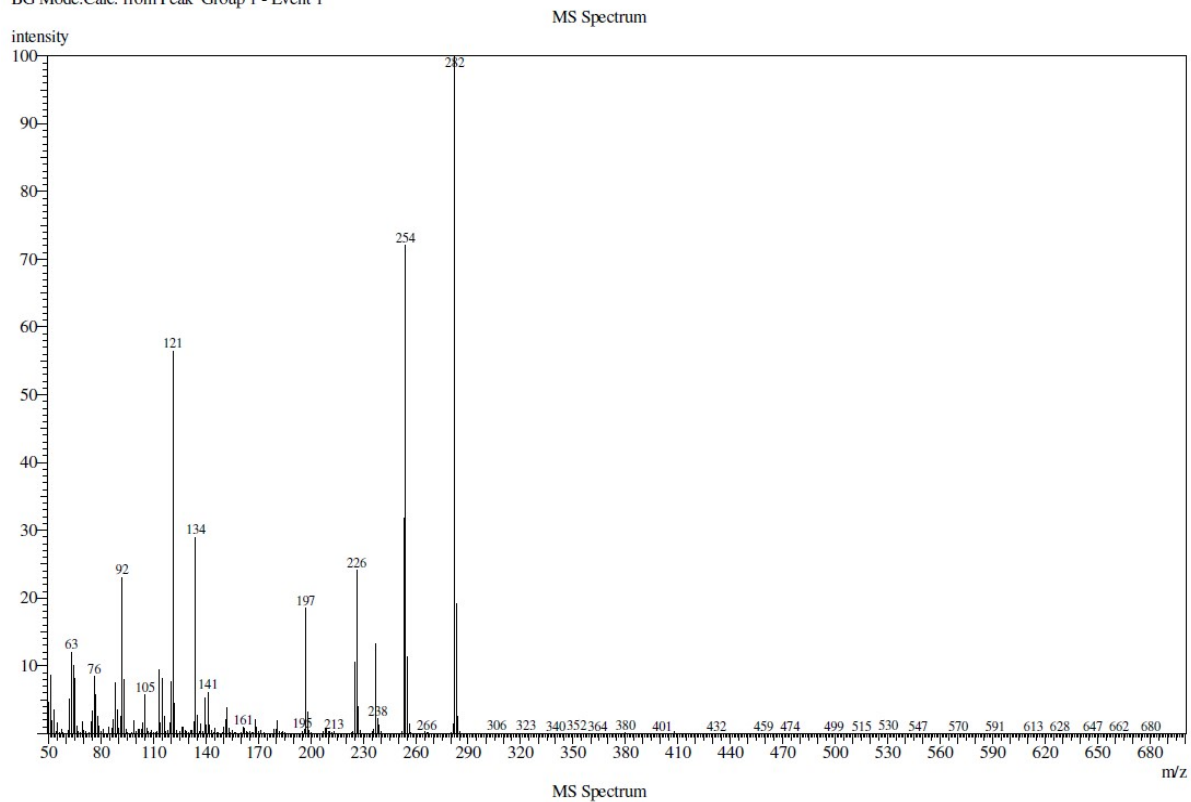



# <sup>1</sup>H NMR Spectra (DMSO) of 3o

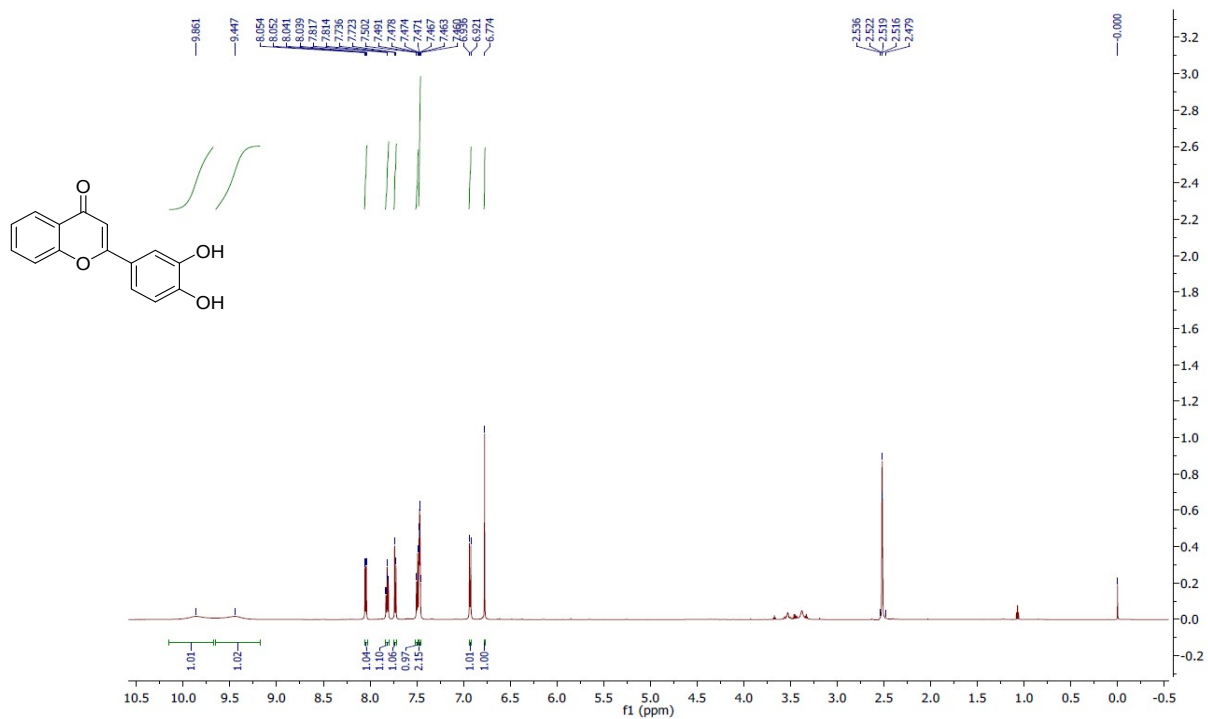

# <sup>13</sup>C NMR Spectra (DMSO) of 3o

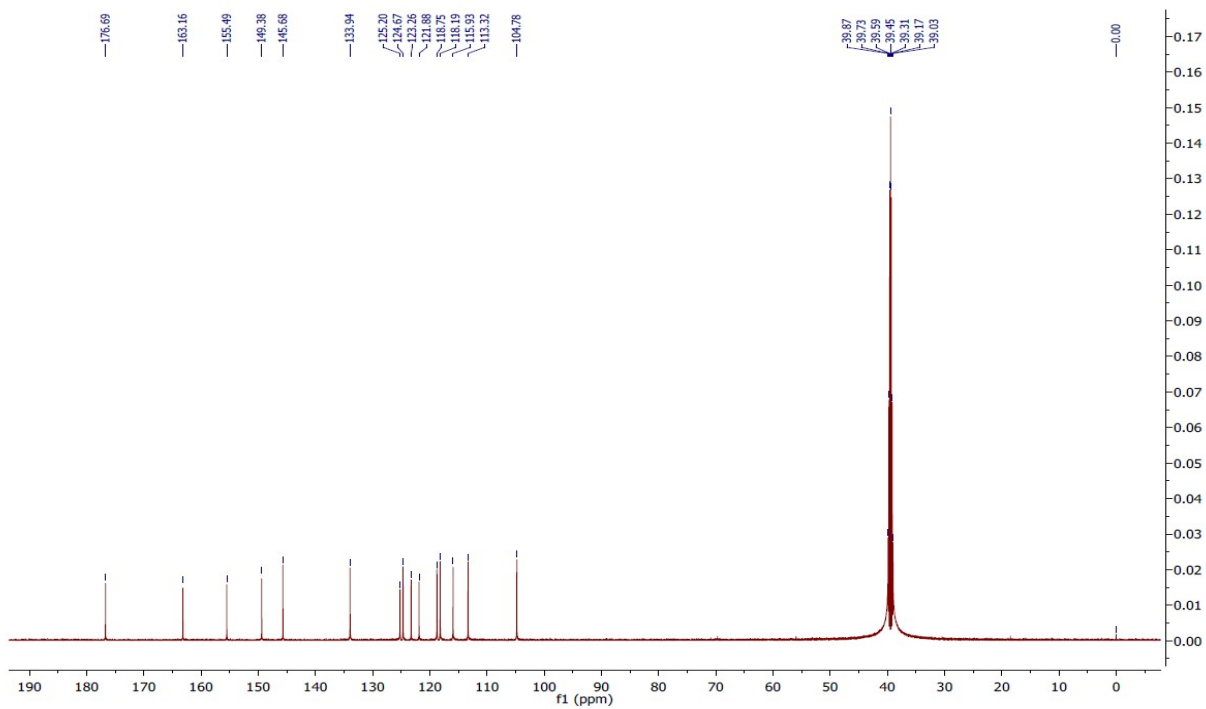

# Mass Spectra of 3o

Line#:1 R.Time:7.2600(Scan#:1153)  
MassPeaks:444  
RawMode:Averaged 7.2550-7.2650(1152-1154) BasePeak:254.1000(3728)  
BG Mode:Calc. from Peak Group 1 - Event 1

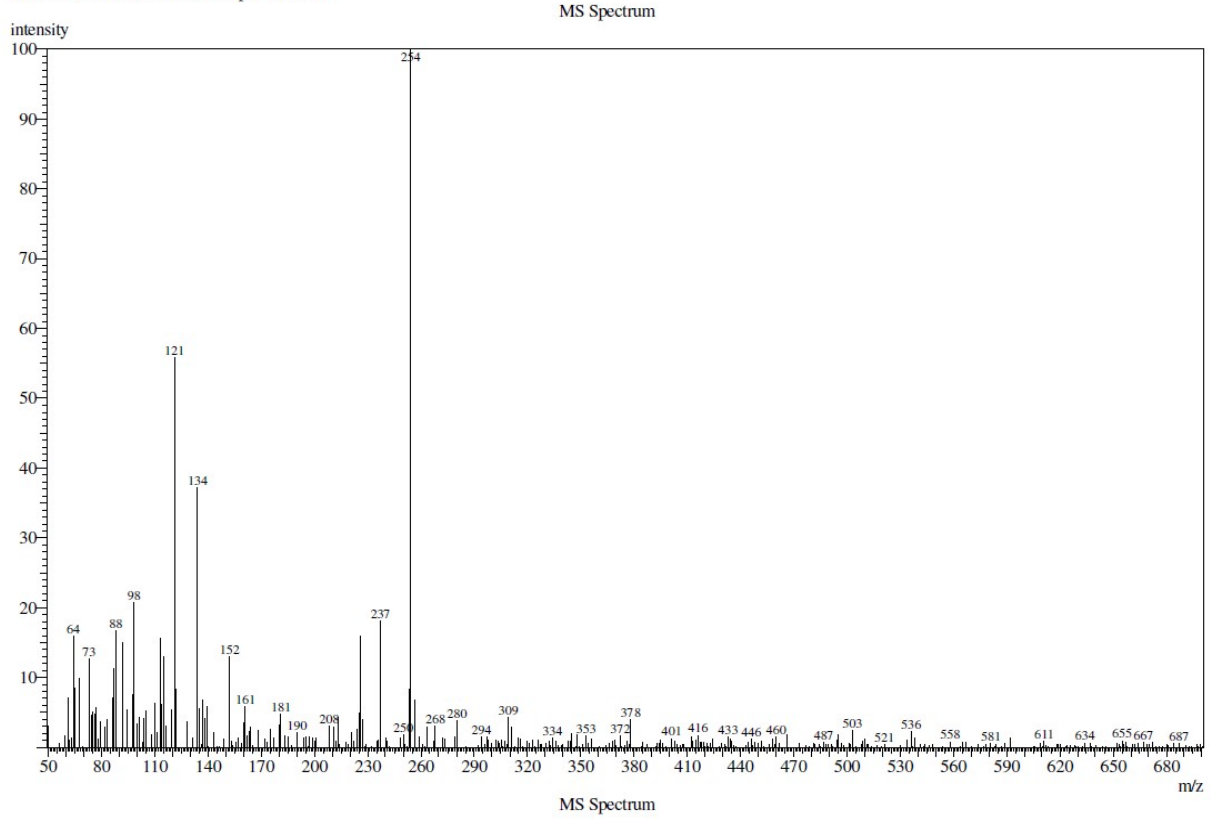



# Mass Spectra of 3t

Line#:1 R.Time:2.6850(Scan#:238)

MassPeaks:572

RawMode:Averaged 2.6800-2.6900(237-239) BasePeak:228.0000(882295)

BG Mode:Calc. from Peak Group 1 - Event 1

MS Spectrum

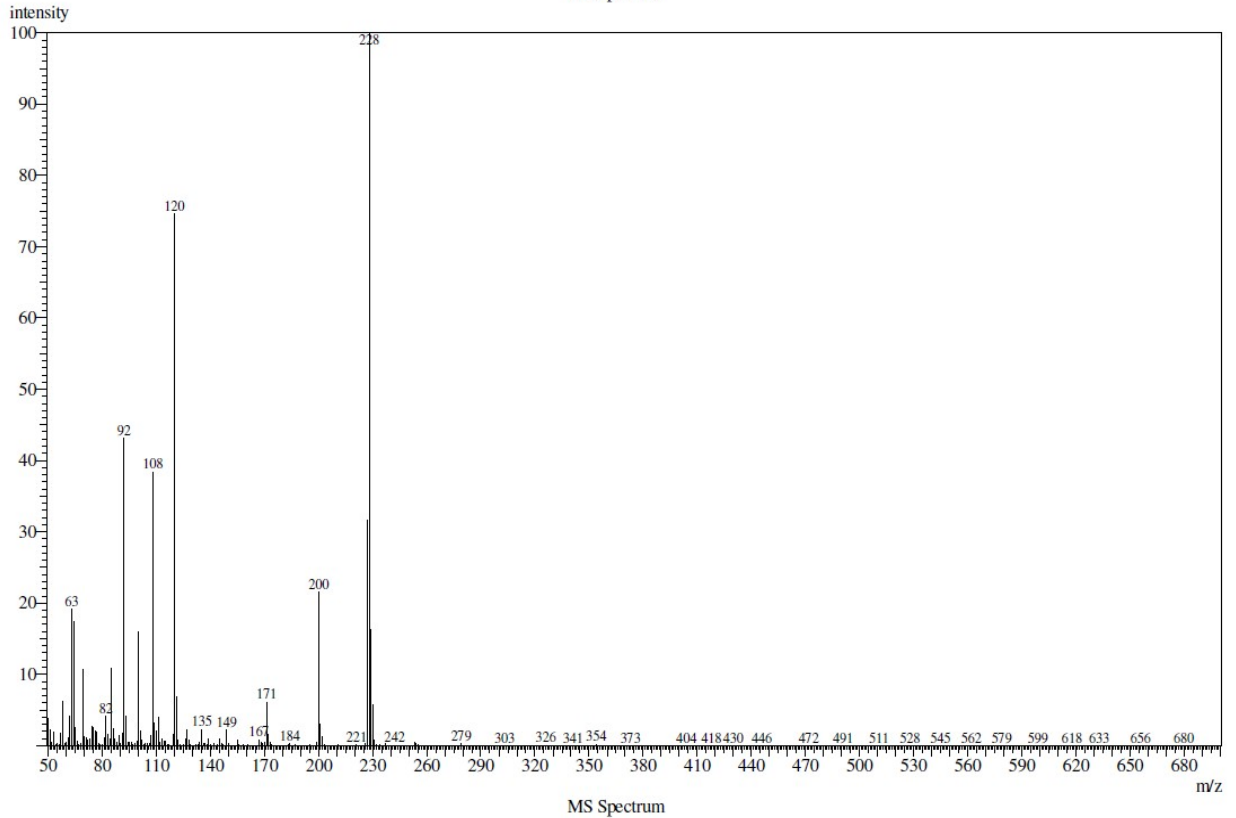

# <sup>1</sup>H NMR Spectra (CDCl<sub>3</sub>) of 3u

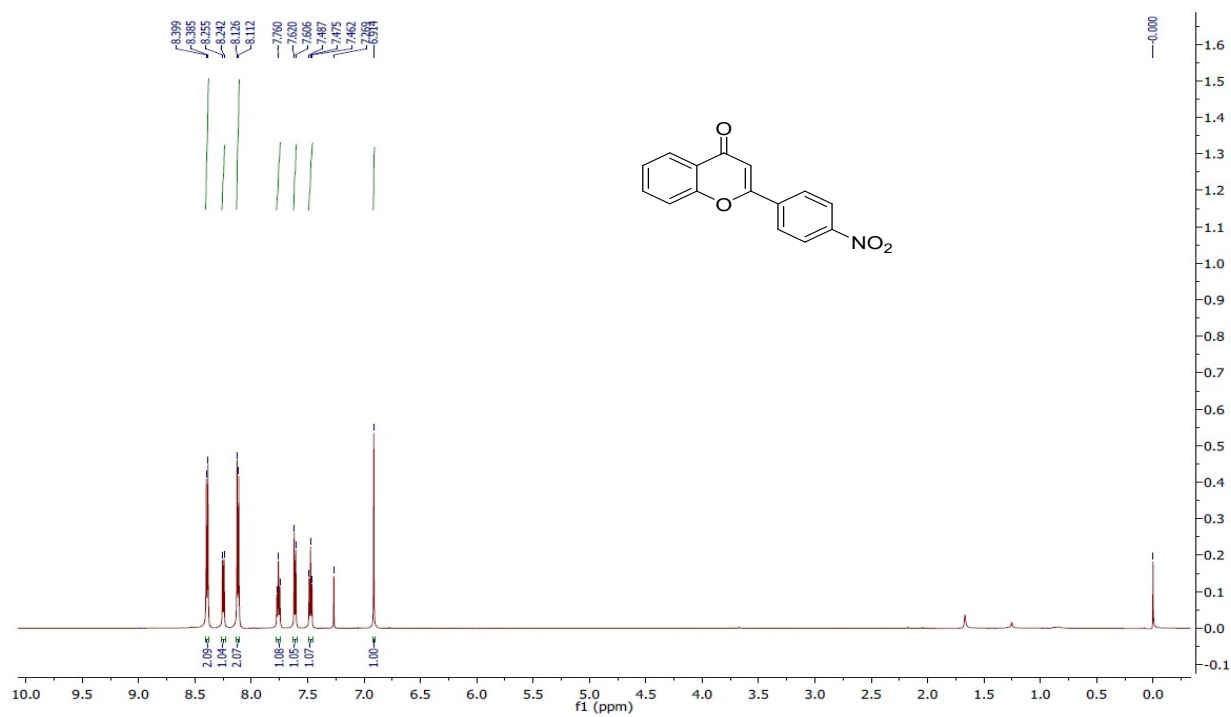

# <sup>13</sup>C NMR Spectra (CDCl<sub>3</sub>) of 3u

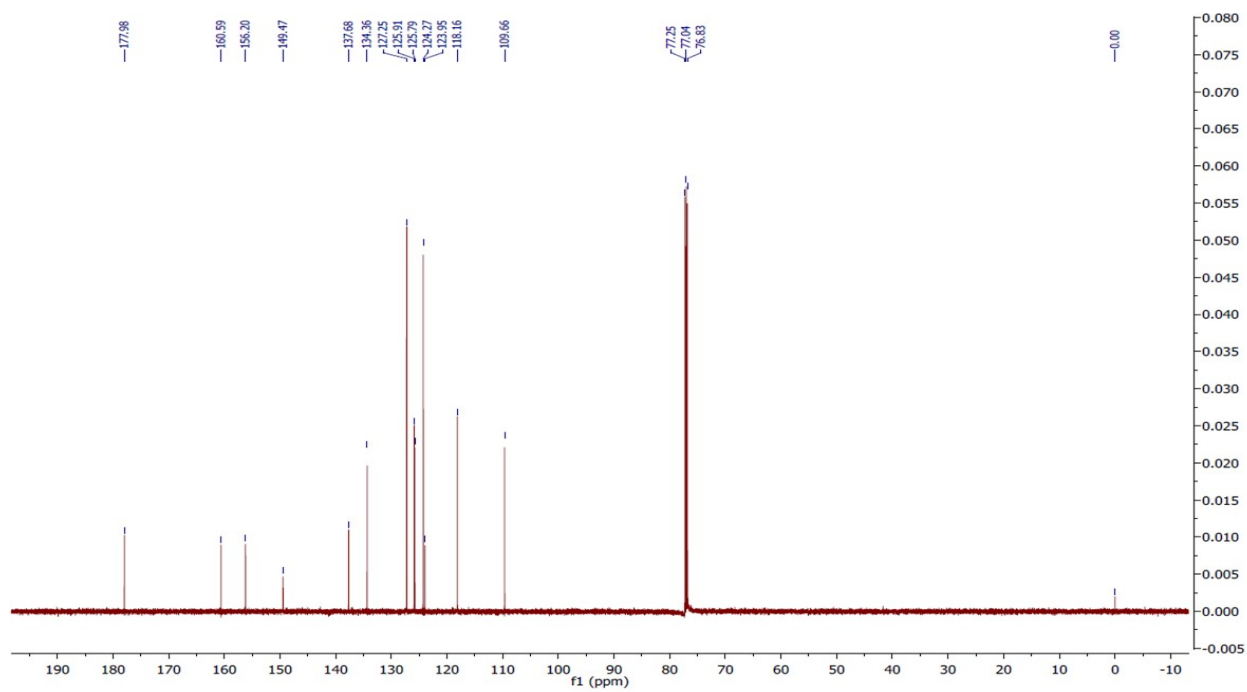

# Mass Spectra of 3u

Line#:1 R.Time:6.3650(Scan#:974)  
MassPeaks:529  
RawMode:Averaged 6.3600-6.3700(973-975) BasePeak:267.1000(139936)  
BG Mode:Calc. from Peak Group 1 - Event 1

MS Spectrum

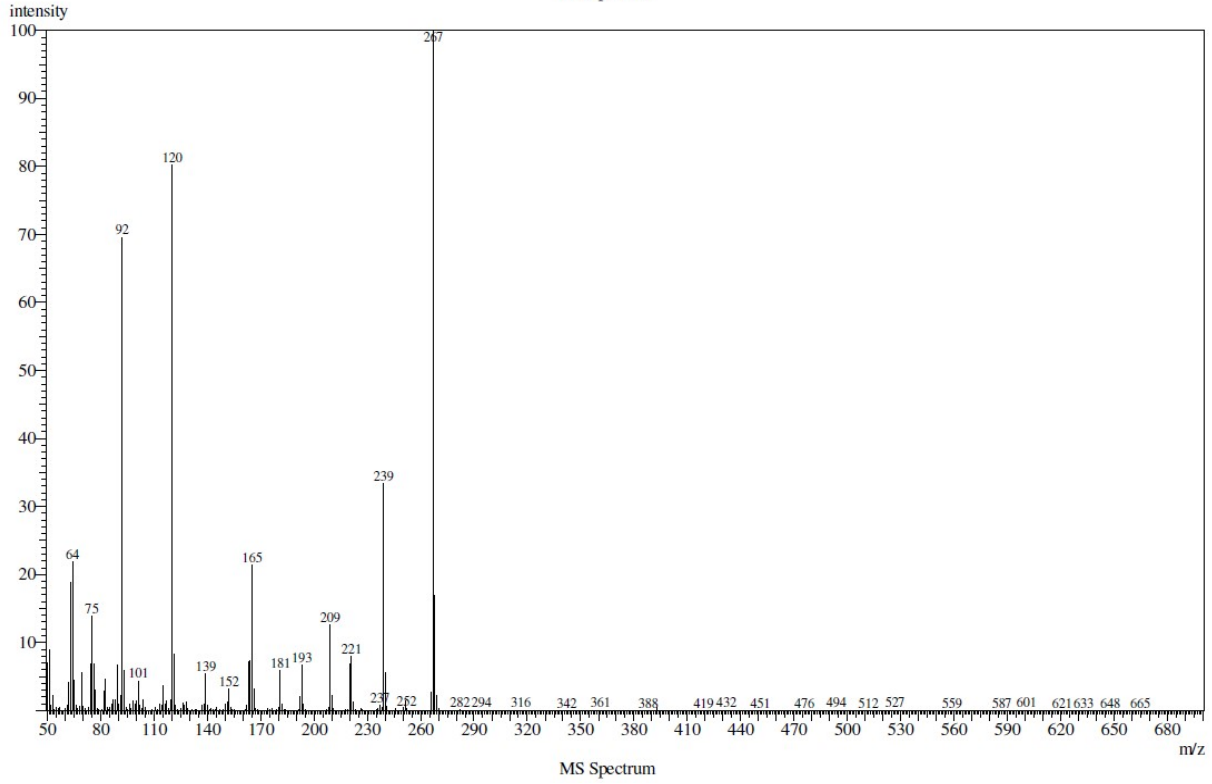

# <sup>1</sup>H NMR Spectra (DMSO) of (3v) (6,3'4'-HOFL)

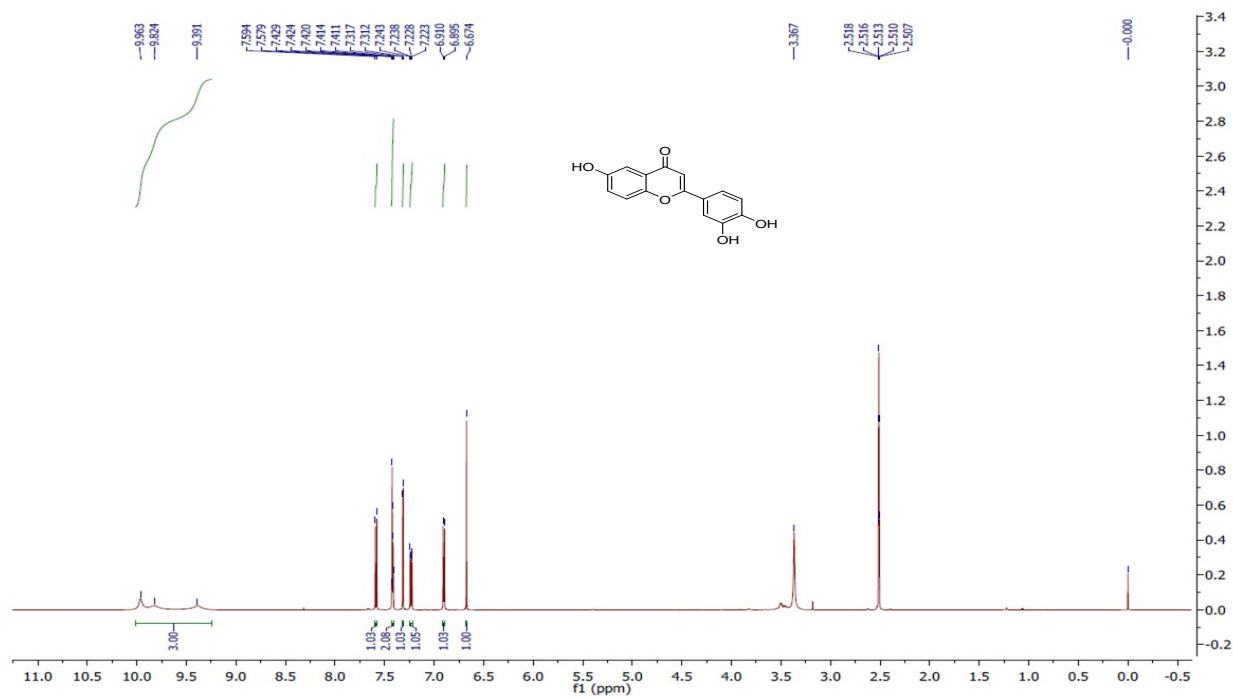

# <sup>13</sup>C NMR Spectra (DMSO) of (3v) (6,3'4'-HOFL)

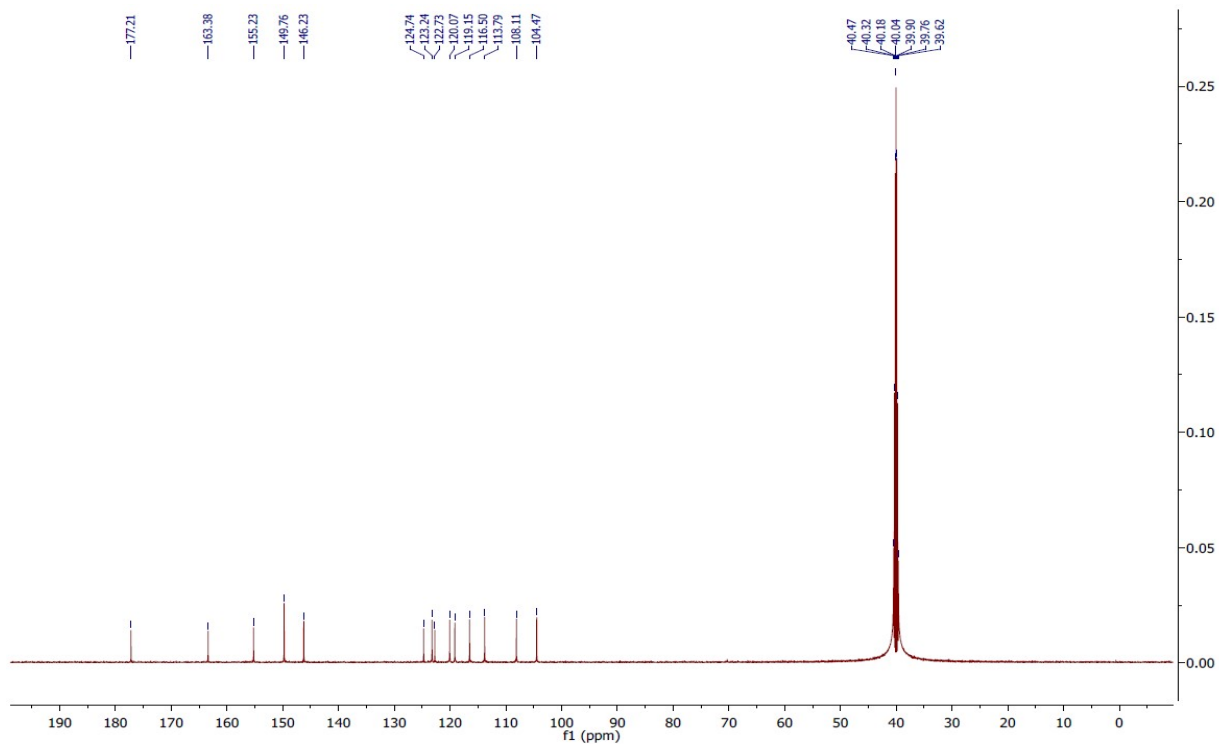

# Mass spectra of 3v (6,3'4'-HOFL)

Line#:1 R.Time:8.9800(Scan#:1497)  
MassPeaks:580  
RawMode:Averaged 8.9750-8.9850(1496-1498) BasePeak:270.1000(14642)  
BG Mode:Calc. from Peak Group 1 - Event 1

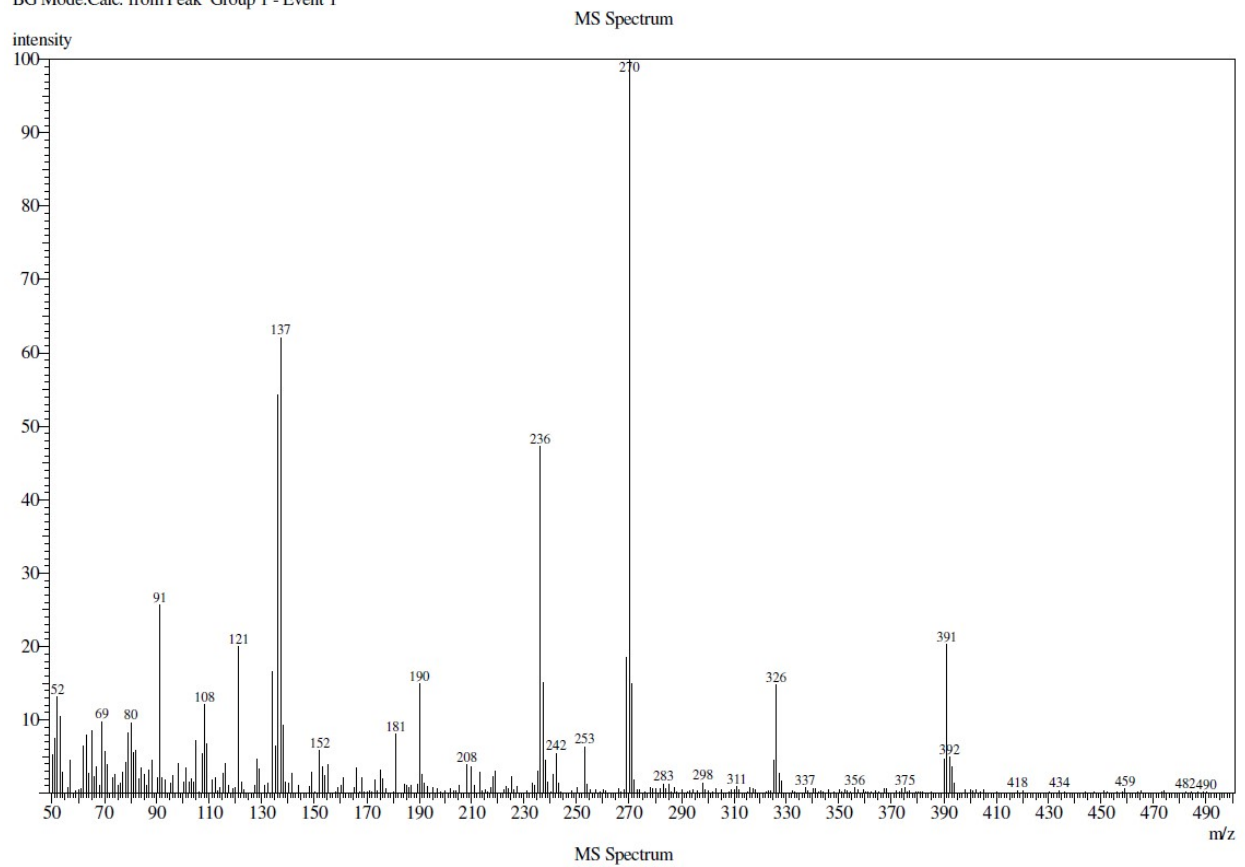



## NMR spectra of the identified intermediates.

### <sup>1</sup>H NMR Spectra (CDCl<sub>3</sub>) of 2-(4-nitrophenyl)-chroman-4-one

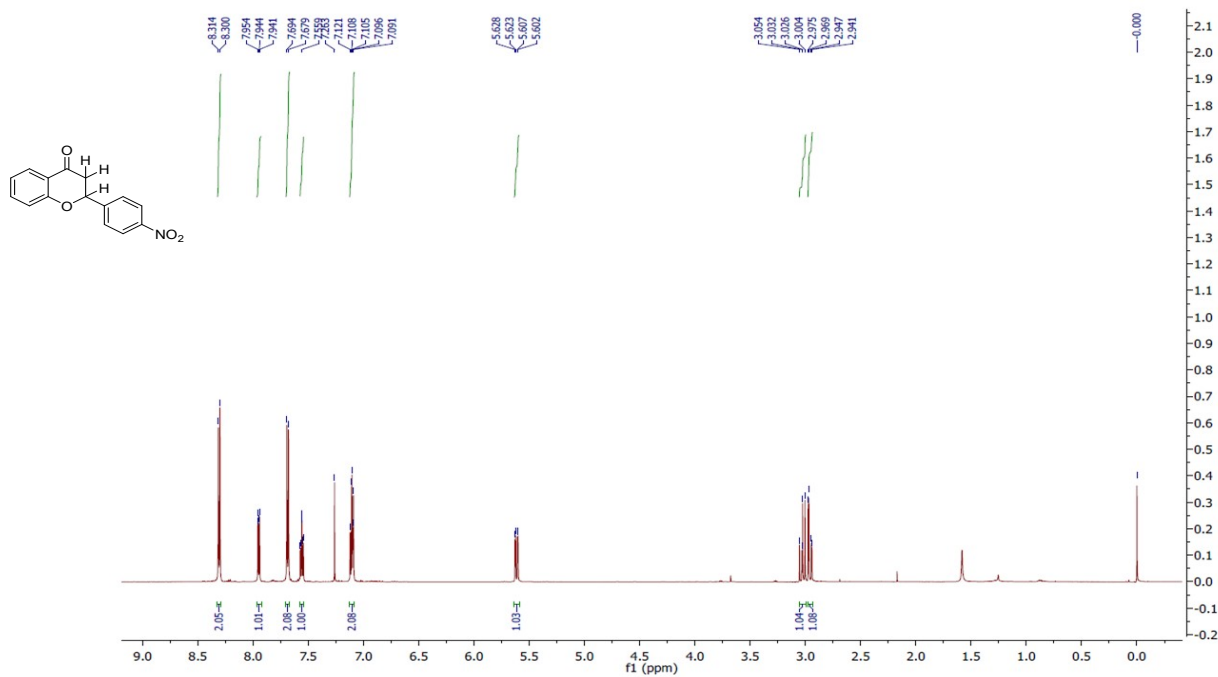

### <sup>13</sup>C NMR Spectra (CDCl<sub>3</sub>) of 2-(4-nitrophenyl)-chroman-4-one

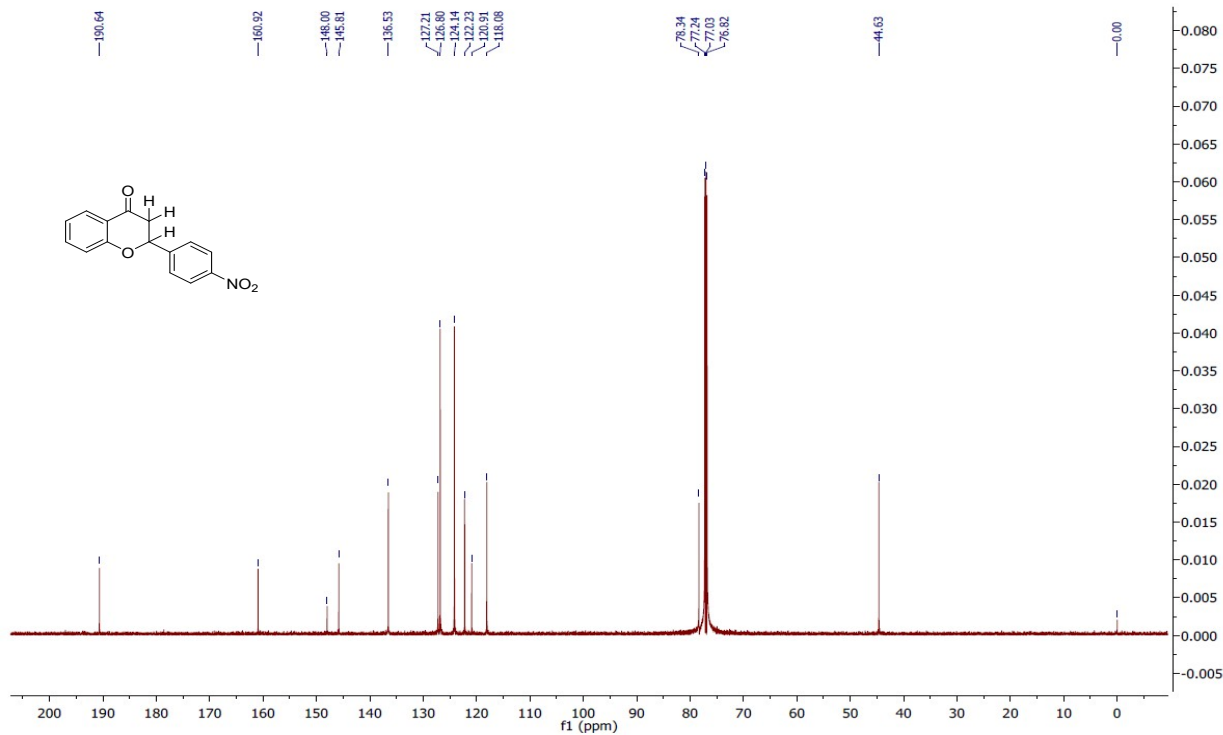

# <sup>1</sup>H NMR Spectra (DMSO) of (E)-1-(2-hydroxyphenyl)-3-(4-nitrophenyl)prop-2-en-1-one

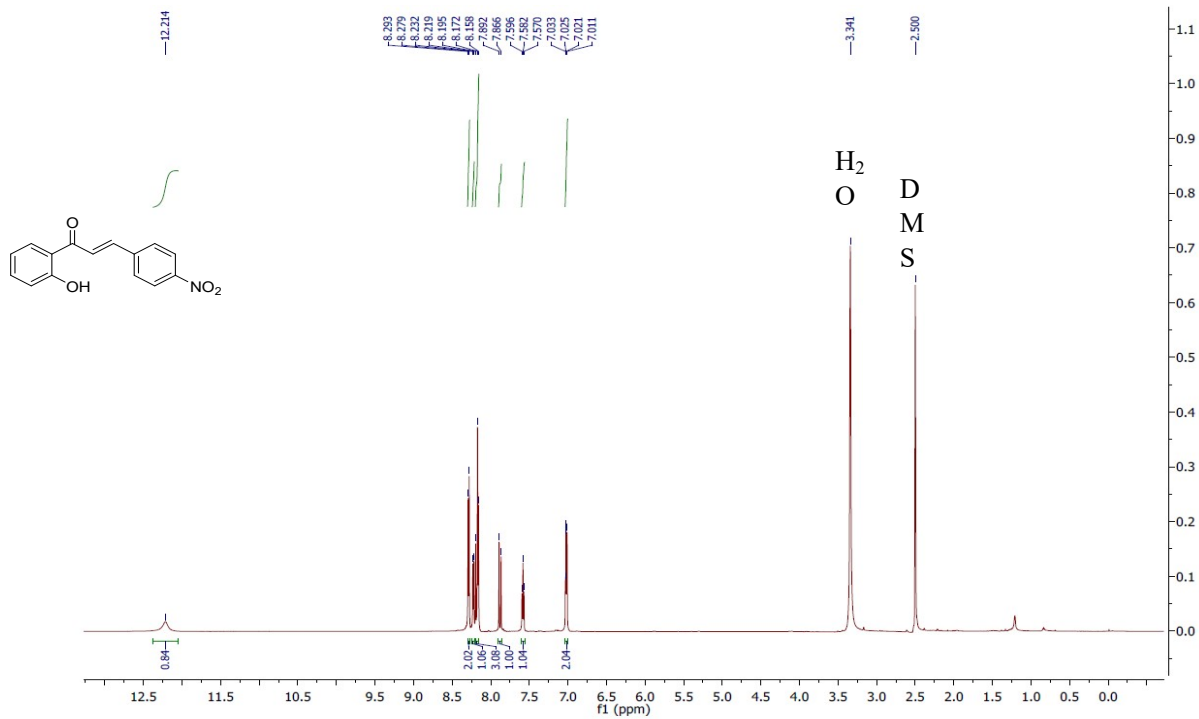

# <sup>13</sup>C NMR Spectra (DMSO) of (E)-1-(2-hydroxyphenyl)-3-(4-nitrophenyl)prop-2-en-1-one

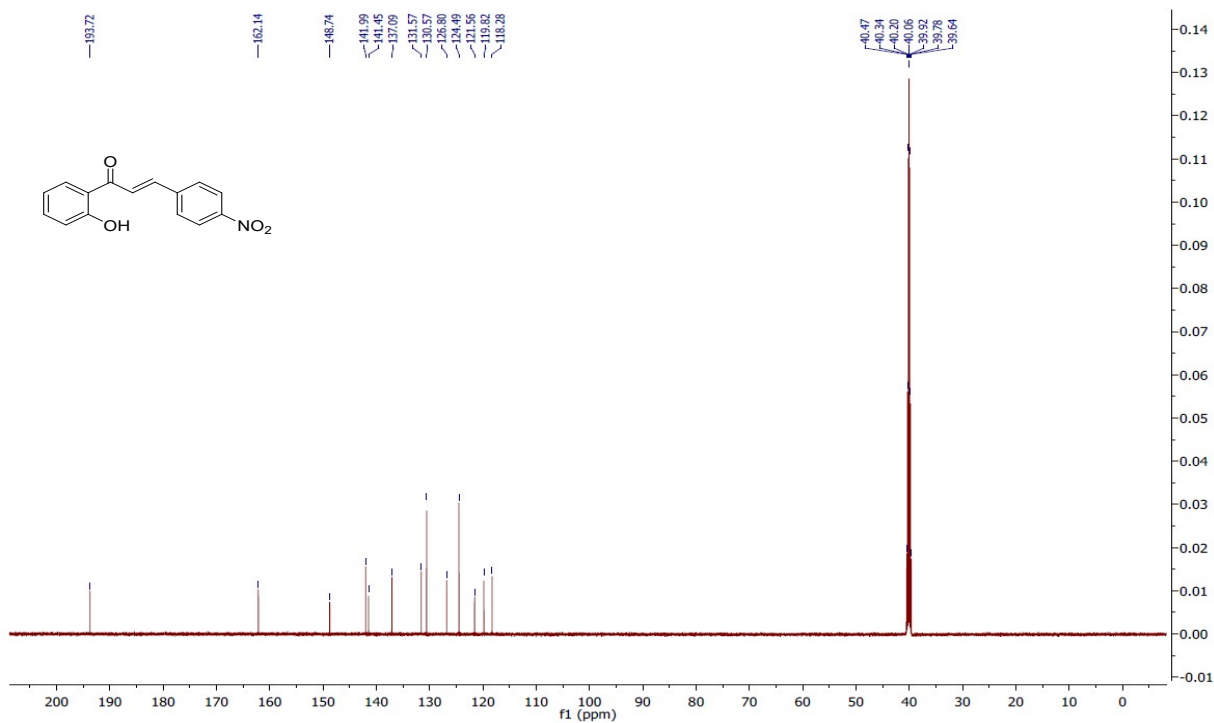

# <sup>1</sup>H NMR Spectra (CDCl<sub>3</sub>) of (E)-1-(2-hydroxyphenyl)-3-(4-methoxyphenyl)prop-2-en-1-one

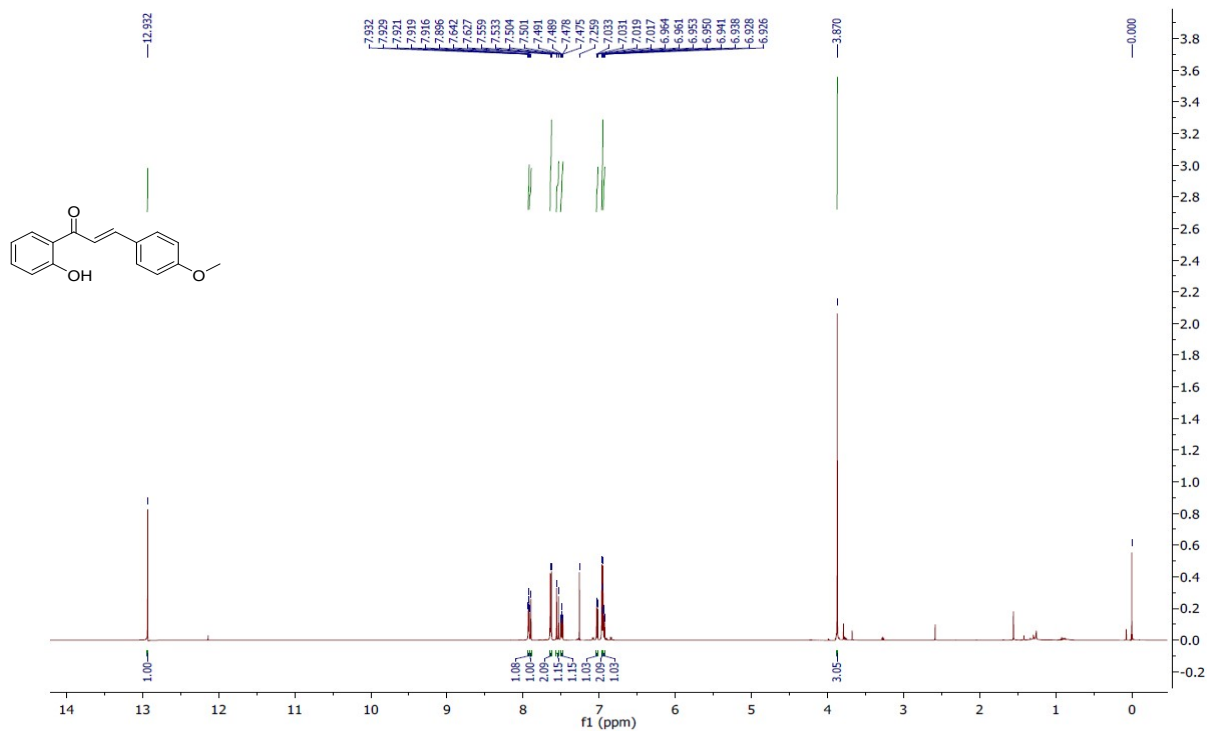

# <sup>13</sup>C NMR Spectra (CDCl<sub>3</sub>) of (E)-1-(2-hydroxyphenyl)-3-(4-methoxyphenyl)prop-2-en-1-one

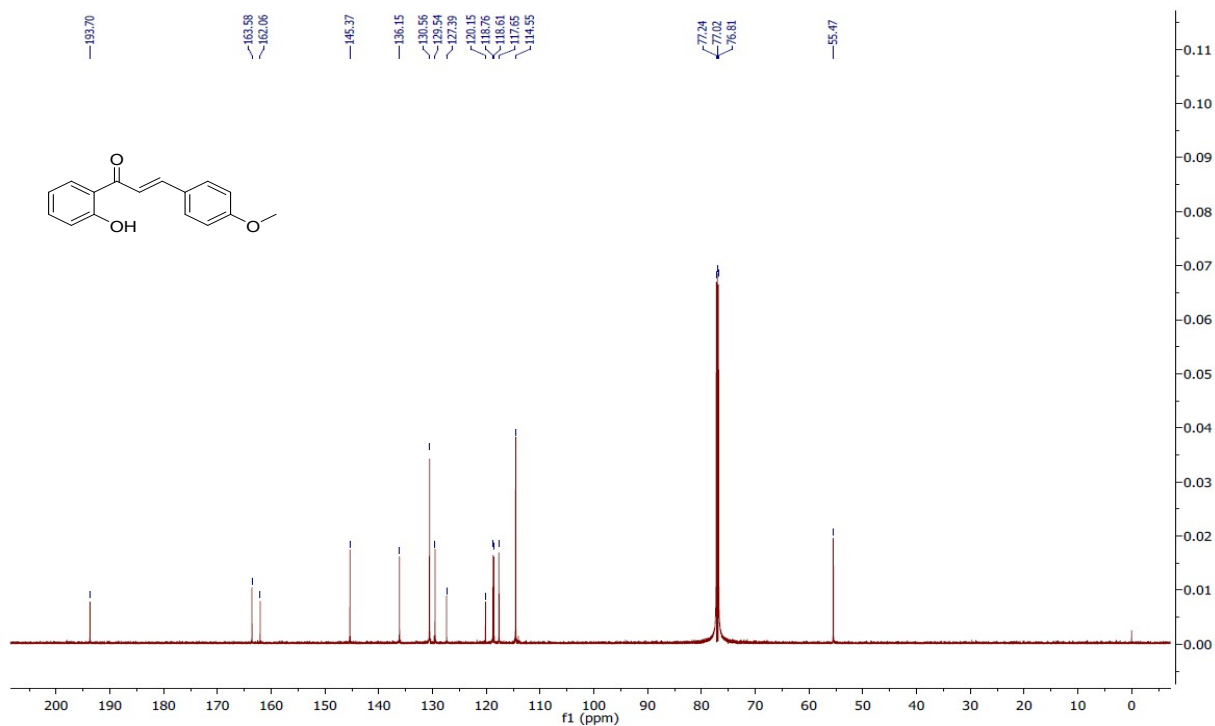

### <sup>1</sup>H NMR Spectra (CDCl<sub>3</sub>) of (Z)-3-(4-methoxybenzylidene)-2-(4-methoxyphenyl)chroman-4-one

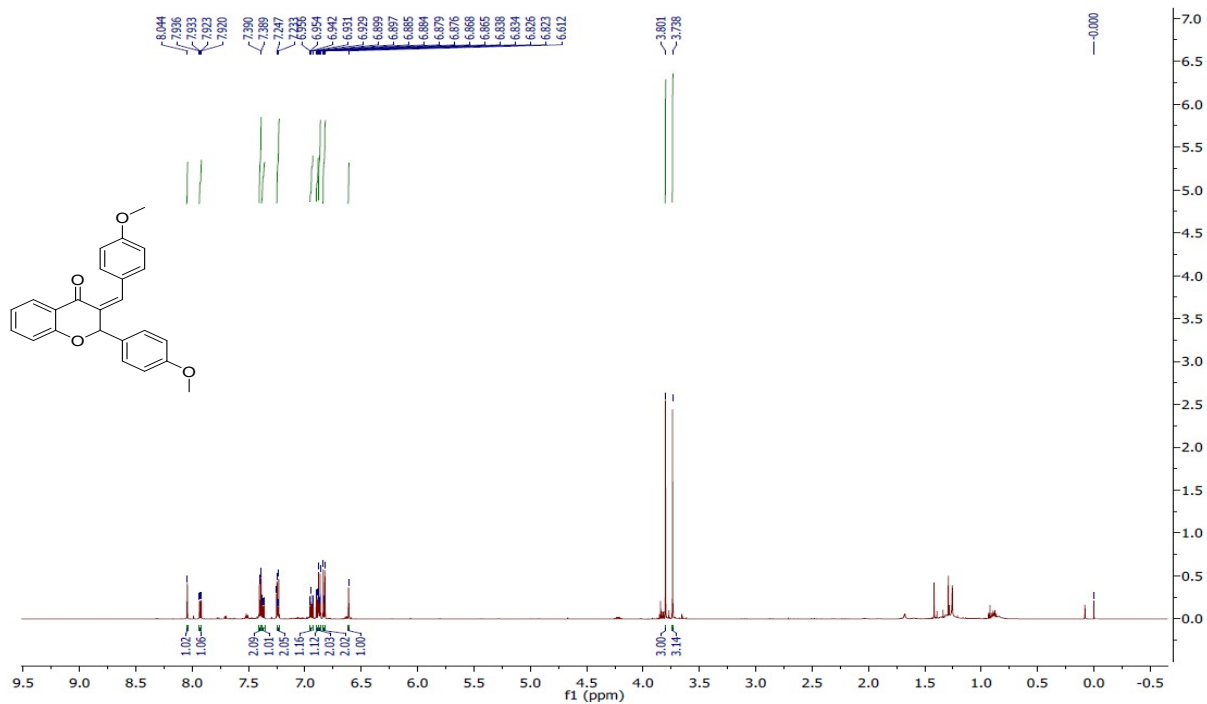

### <sup>13</sup>C NMR Spectra (CDCl<sub>3</sub>) of (Z)-3-(4-methoxybenzylidene)-2-(4-methoxyphenyl)chroman-4-one

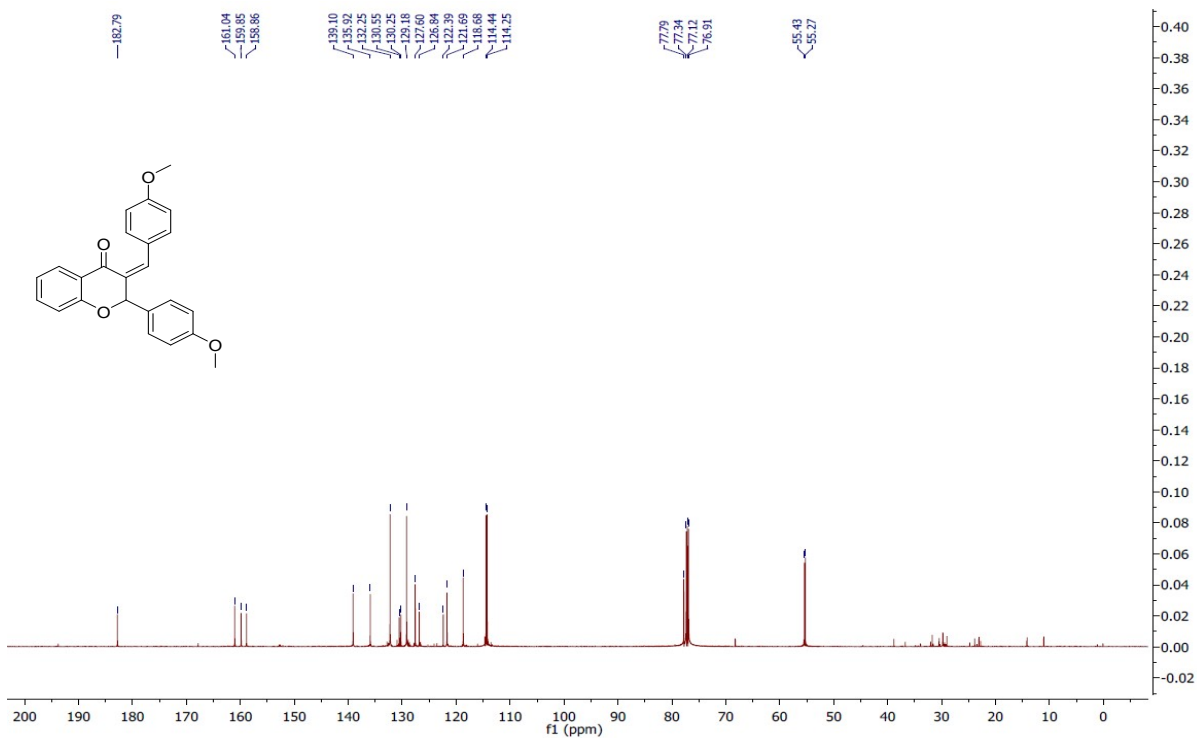

### <sup>1</sup>H NMR Spectra (CDCl<sub>3</sub>) of 3-(4-methoxybenzyl)-2-(4-methoxyphenyl)-4H-chromen-4-one

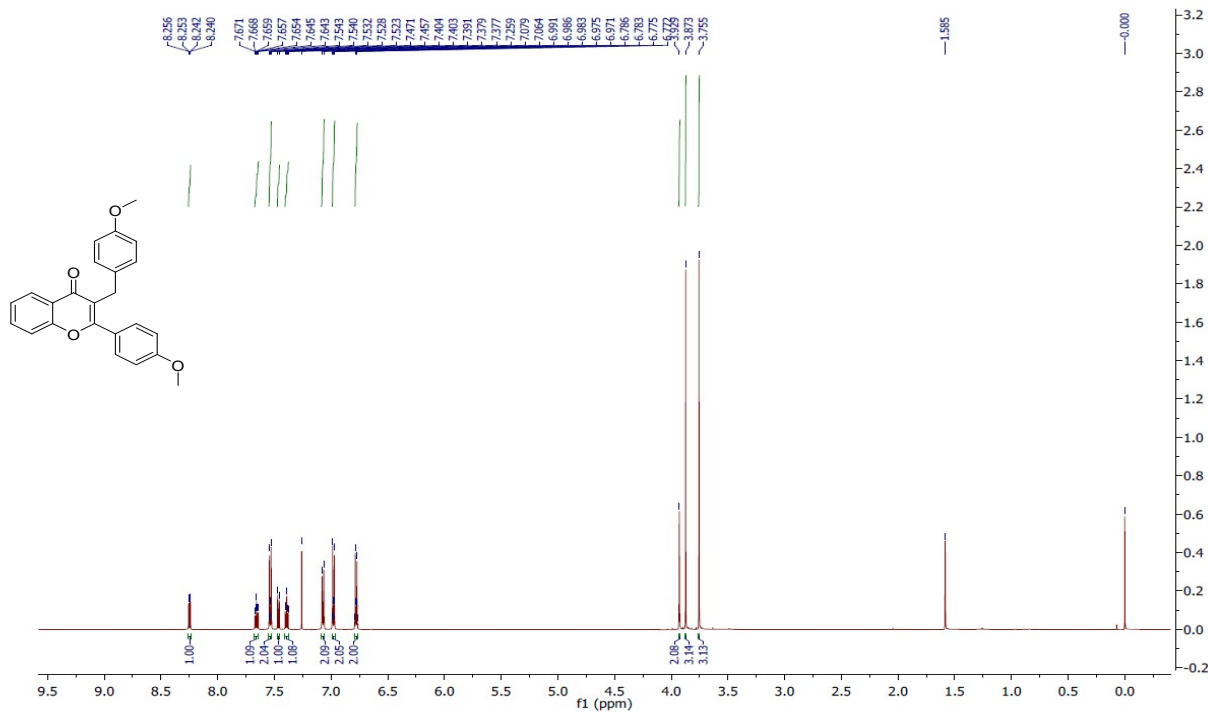

**<sup>13</sup>C NMR Spectra (CDCl<sub>3</sub>) of 3-(4-methoxybenzyl)-2-(4-methoxyphenyl)-4H-chromen-4-one**

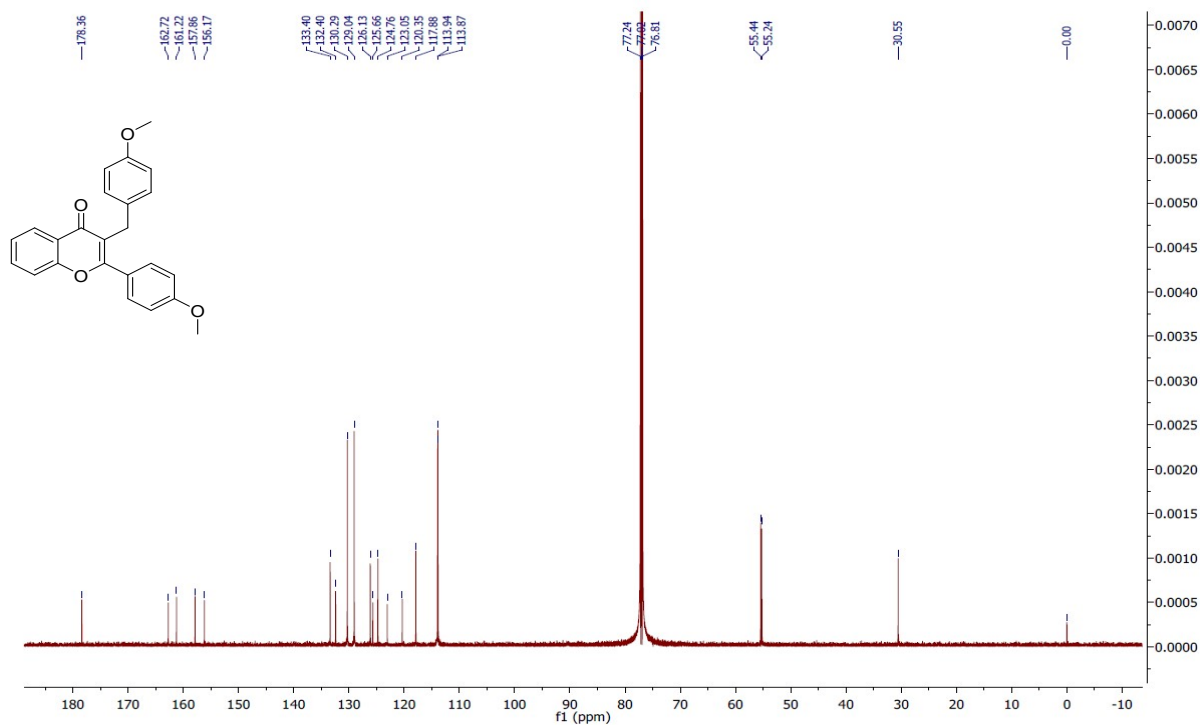

**<sup>1</sup>H NMR Spectra (CDCl<sub>3</sub>) of (E)-1-(2-hydroxyphenyl)-3-(4-hydroxyphenyl)prop-2-en-1-one**



Line#:1 R.Time:6.0850(Scan#:918)  
MassPeaks:515  
RawMode:Averaged 6.0800-6.0900(917-919) BasePeak:121.1000(6106)  
BG Mode:Calc. from Peak Group 1 - Event 1

MS Spectrum

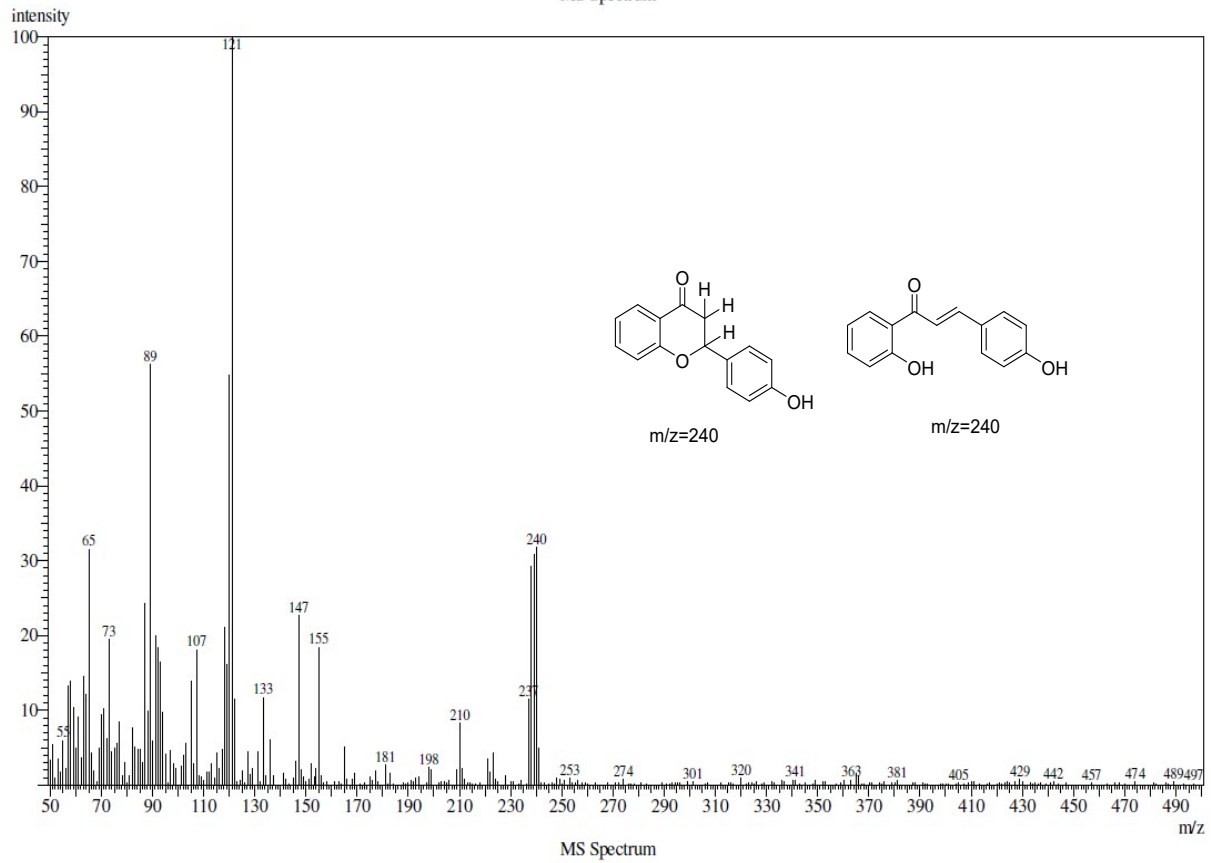

### <sup>1</sup>H NMR Spectra (CDCl<sub>3</sub>) of 2-phenylchroman-4-one

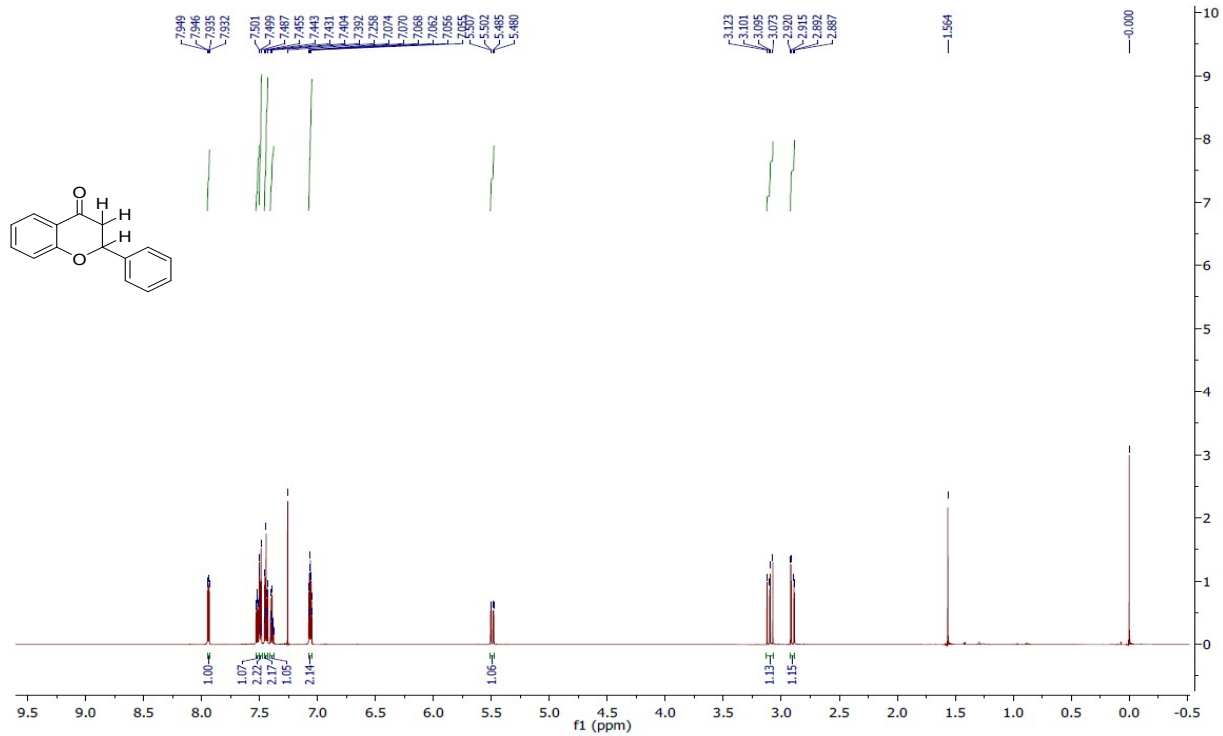

### <sup>13</sup>C NMR Spectra (CDCl<sub>3</sub>) of 2-phenylchroman-4-one

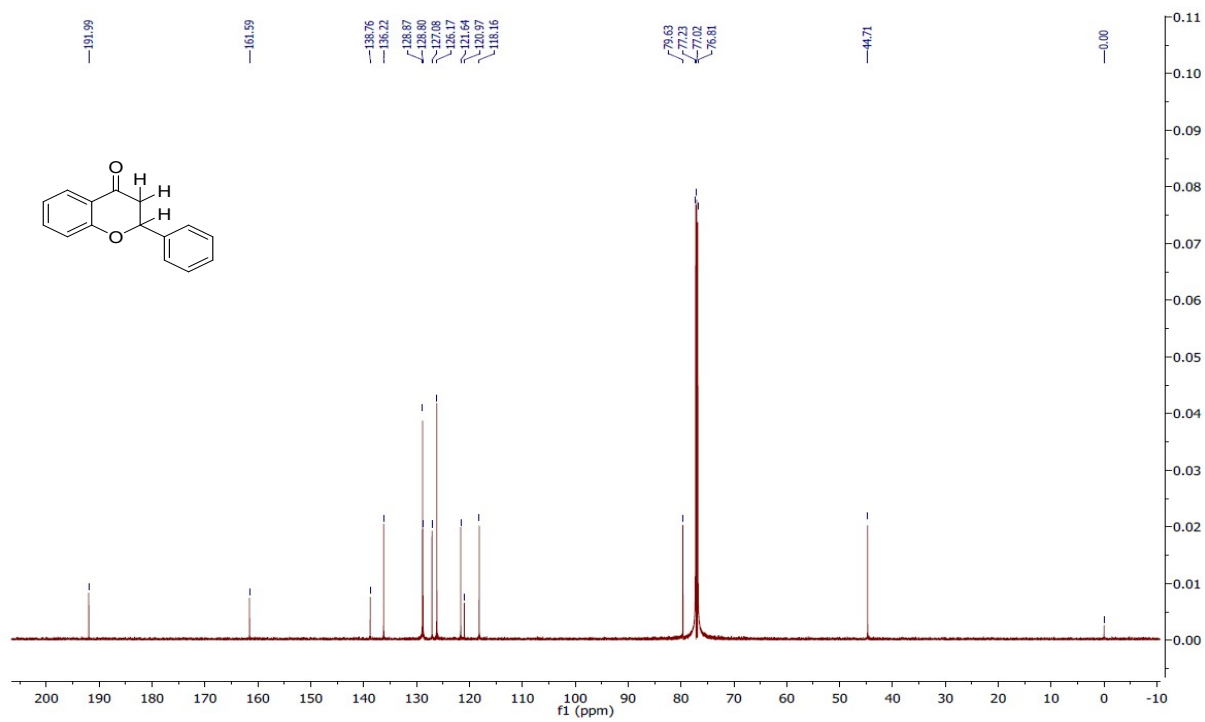



## DFT COORDINATES

### A

|   |                   |                   |                   |
|---|-------------------|-------------------|-------------------|
| C | -4.30185805459068 | 0.88010560375512  | 0.00345140087050  |
| C | -2.89868205202019 | 0.81093427293555  | 0.01777809197676  |
| C | -2.14388509213014 | 2.00839260048134  | 0.02063478193337  |
| C | -2.84389372809650 | 3.23149506378688  | 0.00898103262741  |
| C | -4.22528088906757 | 3.29502897774839  | -0.00511451589248 |
| C | -4.95679526190535 | 2.10031708216880  | -0.00783233152589 |
| H | -4.85603500616805 | -0.06098286014886 | 0.00158393084261  |
| H | -2.23966009766857 | 4.14083453344251  | 0.01154834414450  |
| H | -4.73581384214040 | 4.26017619917412  | -0.01404828611279 |
| H | -6.04964223783558 | 2.12306208637623  | -0.01891333298276 |
| O | -2.39213781199115 | -0.43185594330257 | 0.02765568342369  |
| H | -1.42770479977968 | -0.42666834548758 | 0.03856671171502  |
| C | -0.65479872276133 | 2.11428446147442  | 0.03464922455412  |
| O | -0.11987058149602 | 3.20850664996881  | 0.03511495202056  |
| C | 0.20063243385189  | 0.87279357008053  | 0.04800861515332  |
| H | 0.00775615102108  | 0.26491163699025  | 0.94842511038766  |
| H | 0.02544680565078  | 0.25837180497193  | -0.85157556146572 |
| H | 1.25667047712751  | 1.16929812558412  | 0.05746595833012  |

### B

|   |             |            |             |
|---|-------------|------------|-------------|
| C | -4.33002920 | 2.01371018 | 1.10070043  |
| C | -3.40045787 | 1.16952160 | 0.47707154  |
| C | -2.55628868 | 1.68858273 | -0.52961928 |
| C | -2.71909289 | 3.03036571 | -0.91886439 |
| C | -3.63980255 | 3.86132389 | -0.30216648 |
| C | -4.44297206 | 3.34330712 | 0.72112255  |
| H | -4.97042470 | 1.58852085 | 1.87649274  |

|   |                   |                   |                   |
|---|-------------------|-------------------|-------------------|
| H | -2.07458947       | 3.40235541        | -1.71836463       |
| H | -3.73429534       | 4.90543485        | -0.60746506       |
| H | -5.17477608       | 3.98282557        | 1.22139235        |
| O | -3.40294804       | -0.11340844       | 0.88183586        |
| H | -2.86134436       | -0.66935994       | 0.30493944        |
| C | -1.50069931       | 0.90955059        | -1.23078849       |
| O | -1.15210863       | 1.21294589        | -2.36193238       |
| C | -0.84027792       | -0.20380247       | -0.50397124       |
| H | -0.94854216       | -0.25496188       | 0.58331289        |
| C | 0.69860801        | -2.50373249       | 0.75395430        |
| C | 0.65528737        | -2.22128762       | -0.62464754       |
| C | 1.36494679        | -3.05173424       | -1.51001466       |
| C | 2.09961753        | -4.13400334       | -1.04437182       |
| C | 2.11981019        | -4.37987029       | 0.32452762        |
| C | 1.42815543        | -3.57969453       | 1.23312491        |
| H | 0.15748644        | -1.87508042       | 1.46327937        |
| H | 2.65340832        | -4.78302843       | -1.72248225       |
| H | 1.47148875        | -3.80864752       | 2.29779558        |
| H | 1.33724409        | -2.83893318       | -2.58121399       |
| C | -0.09035273       | -1.09714533       | -1.17925219       |
| N | 2.89353721        | -5.51457055       | 0.82886858        |
| O | 2.90776846        | -5.70169416       | 2.02708869        |
| O | 3.47891442        | -6.20465798       | 0.02165400        |
| H | -0.02812452       | -0.96792204       | -2.26542908       |
| C |                   |                   |                   |
| C | -1.33624194787250 | -0.62428121211621 | -1.43472832429856 |
| C | -0.97084826059995 | -0.25254212176786 | -0.13847990519974 |
| C | -1.75510875078878 | 0.62539354783517  | 0.61897892226572  |

|          |                   |                   |                   |
|----------|-------------------|-------------------|-------------------|
| C        | -2.92990930544012 | 1.14014079161650  | 0.05033938466521  |
| C        | -3.30390983853479 | 0.78144799811877  | -1.23377464557954 |
| C        | -2.50233850174925 | -0.10252824526366 | -1.97406392454634 |
| H        | -0.69974795922812 | -1.31334835484016 | -1.99307607515222 |
| H        | -3.53007137146832 | 1.82466934384241  | 0.65360765406621  |
| H        | -4.21927029307918 | 1.18361000396065  | -1.67327563818390 |
| H        | -2.79723872605134 | -0.38619329662226 | -2.98720750367274 |
| O        | 0.17471777146105  | -0.78384045315865 | 0.35414801984364  |
| C        | -1.33495318610693 | 0.98875748251622  | 1.98392875188327  |
| O        | -1.98008972789759 | 1.74819388184102  | 2.69826695659541  |
| C        | -0.08931913828972 | 0.36895512479218  | 2.40092321984016  |
| C        | 3.56638791813865  | -1.76289396917690 | 3.53990962206781  |
| C        | 2.36452889732597  | -1.14001119513162 | 3.23811914256533  |
| C        | 1.87064134134516  | -1.14135861714218 | 1.92387787203079  |
| C        | 2.60153601143514  | -1.78767522913541 | 0.91456745344634  |
| C        | 3.80569936038267  | -2.41401116515097 | 1.20557278977983  |
| C        | 4.27054672093162  | -2.39051278531765 | 2.51581435655111  |
| H        | 3.95992834243396  | -1.77312260757938 | 4.55612010942390  |
| H        | 1.80439387246302  | -0.66061200857688 | 4.04165062899548  |
| H        | 2.22438343901505  | -1.79382912320304 | -0.10799854345963 |
| H        | 4.38562544331513  | -2.91622890350345 | 0.43149190532705  |
| N        | 5.53940059156996  | -3.04990530398303 | 2.82896727295309  |
| O        | 6.12265628214478  | -3.61058547786763 | 1.92605292426462  |
| O        | 5.93634654491262  | -2.99824619981264 | 3.97327130589915  |
| C        | 0.60024562426212  | -0.47604607064976 | 1.58999988077802  |
| H        | 0.28778347596968  | 0.61300133547643  | 3.39346816685052  |
| <b>D</b> |                   |                   |                   |
| C        | -0.03445695576253 | 2.19284112377498  | 0.25890509424447  |

|   |                   |                   |                   |
|---|-------------------|-------------------|-------------------|
| C | -0.25473237946132 | 0.82716983367258  | 0.46931330416260  |
| C | -1.39852178241211 | 0.20679278749368  | -0.06830640173540 |
| C | -2.32375119909888 | 0.97837588460125  | -0.78835905166627 |
| C | -2.11494453364010 | 2.33324909788308  | -0.98751820045878 |
| C | -0.95953596508254 | 2.93286395822408  | -0.46560387258178 |
| H | 0.86049956651048  | 2.65303145829832  | 0.68236699247180  |
| H | -3.20135226435555 | 0.47034216840055  | -1.19509643899913 |
| H | -2.83730791183896 | 2.92864771029494  | -1.54970292194336 |
| H | -0.78351766871725 | 4.00038248116539  | -0.62110731679473 |
| O | 0.66238623101544  | 0.15206535063779  | 1.18839268426131  |
| C | -1.57234216895515 | -1.25313726889397 | 0.05472059571624  |
| O | -2.53777799586449 | -1.84617416979582 | -0.38506442407011 |
| C | -0.41934951320133 | -1.96525762627925 | 0.71894331846234  |
| C | 2.32570939462577  | -3.22403737295948 | 4.08883995223032  |
| C | 1.24700971132596  | -2.56391028278931 | 3.51441662133329  |
| C | 1.42979890497108  | -1.73762542120209 | 2.40010599177130  |
| C | 2.71024395964951  | -1.57303935914072 | 1.86082162168584  |
| C | 3.79947840738189  | -2.22569798864866 | 2.42532606849599  |
| C | 3.58874252756838  | -3.04285677828685 | 3.53211484282387  |
| H | 2.20300053576414  | -3.86670808310361 | 4.96045869098179  |
| H | 0.24895535225643  | -2.68711631290962 | 3.94237730077984  |
| H | 2.85402326955765  | -0.92119850718290 | 0.99778971712817  |
| H | 4.80522405016964  | -2.10887017810598 | 2.02168480648252  |
| N | 4.73185658077312  | -3.72741715671599 | 4.13475473827460  |
| O | 5.81642643615588  | -3.59108716725393 | 3.60901771365920  |
| O | 4.53404625571676  | -4.39552199391683 | 5.12763005678422  |
| C | 0.23859620428481  | -1.07621891109699 | 1.76584313472194  |
| H | -0.77131482957618 | -2.90610672824846 | 1.16325878943555  |

H -0.504904444468760 -0.84317763397126 2.55118552871272  
H 0.31836376492699 -2.21756919394488 -0.06424274637043

## II

C -4.062662 1.193143 -1.382542  
C -2.659132 1.188766 -1.381737  
C -1.912832 2.358333 -1.157014  
C -2.662428 3.531812 -0.882899  
C -4.062559 3.554018 -0.876321  
C -4.759635 2.377595 -1.131801  
H -4.614267 0.250237 -1.555235  
H -2.118247 4.446024 -0.695671  
H -4.592946 4.494437 -0.679249  
H -5.860167 2.376438 -1.147219  
O -2.018000 0.027573 -1.626972  
H -2.535621 -0.570025 -2.180334  
C -0.473716 2.470515 -1.241798  
O -0.042039 3.690861 -0.850187  
I 1.877709 4.202208 -0.852173  
C 0.401392 1.434023 -1.701428  
H 1.426467 1.641006 -1.723580  
H -0.019867 0.510777 -1.951509  
C 1.559891 -3.556752 1.611927  
C 1.033814 -2.309759 1.279361  
C 1.894726 -1.225410 1.065531  
C 3.280211 -1.402347 1.089972  
C 3.820115 -2.642790 1.397493  
C 2.940163 -3.685687 1.689268  
H 0.917959 -4.408193 1.832235

|   |           |           |          |
|---|-----------|-----------|----------|
| H | -0.047165 | -2.166532 | 1.222590 |
| H | 3.928492  | -0.545336 | 0.885362 |
| H | 4.893709  | -2.808028 | 1.441967 |
| N | 3.500757  | -4.964827 | 2.141561 |
| O | 4.707085  | -5.061330 | 2.210421 |
| O | 2.724249  | -5.847356 | 2.439268 |
| C | 1.300175  | 0.107454  | 0.924982 |
| H | 0.226101  | 0.175244  | 0.769394 |
| O | 2.008271  | 1.163907  | 1.016337 |

### III

|   |                   |                   |                   |
|---|-------------------|-------------------|-------------------|
| C | -4.55691804127012 | 1.73506583867818  | 0.38518132689747  |
| C | -3.36764817528287 | 1.06472637277843  | 0.05580288486317  |
| C | -2.24731274545628 | 1.81417701889784  | -0.37961746114741 |
| C | -2.38468879296260 | 3.21428456800312  | -0.48712578532216 |
| C | -3.55800806799288 | 3.86752024398423  | -0.16045960728486 |
| C | -4.65219998035141 | 3.11260867757012  | 0.28281242715406  |
| H | -5.40369704900359 | 1.13097069101590  | 0.71760901867074  |
| H | -1.51206481857037 | 3.77116160505467  | -0.83349086968186 |
| H | -3.62917736302751 | 4.95371119465027  | -0.24485473933556 |
| H | -5.59067305548169 | 3.60640454688861  | 0.54776247989299  |
| O | -3.41580447982538 | -0.26965664418799 | 0.18173377239432  |
| H | -2.60985395643013 | -0.69748588613718 | -0.12994503027189 |
| C | -0.91444557948576 | 1.26732538978908  | -0.73437826809658 |
| O | -0.07350359554187 | 1.98835649703390  | -1.25569443033022 |
| C | -0.56293599635176 | -0.17311739054118 | -0.43019724867380 |
| H | -0.92289655624989 | -0.43960278663014 | 0.57673675706037  |
| C | 1.08211376473844  | -2.29557712870451 | 1.17198942056143  |
| C | 1.24084395537375  | -1.87486045615300 | -0.15550030421496 |

|   |                   |                   |                   |
|---|-------------------|-------------------|-------------------|
| C | 1.66024819740024  | -2.79372349338322 | -1.12204278479054 |
| C | 1.91420663043030  | -4.11697013601423 | -0.77665639335071 |
| C | 1.73940986321174  | -4.50794547605597 | 0.54699078638965  |
| C | 1.32576651081250  | -3.61322167594666 | 1.53203658609094  |
| H | 0.76945251033980  | -1.58072858111913 | 1.93794295249086  |
| H | 2.24273682094140  | -4.84551157877120 | -1.51800463106258 |
| H | 1.20740327181272  | -3.95529264853547 | 2.56003721010008  |
| H | 1.79190237806049  | -2.45798064154492 | -2.15091732972443 |
| C | 0.94442752565832  | -0.44481106200069 | -0.53182395786928 |
| O | 1.42035536439294  | -0.18447060457659 | -1.81917081484020 |
| N | 2.00039251195446  | -5.89633349095301 | 0.91871552530809  |
| O | 1.80974485623209  | -6.22076405059368 | 2.07257511785076  |
| O | 2.39304699876798  | -6.65329943298423 | 0.05548806829850  |
| H | 1.18975181819139  | 0.74644409023030  | -1.97807317938343 |
| H | -1.07582523786359 | -0.82299547593881 | -1.16618007561530 |
| H | 1.44502184282913  | 0.20671992619720  | 0.21279104697230  |

#### IV

|   |                   |                   |                   |
|---|-------------------|-------------------|-------------------|
| C | -0.74217100153346 | 0.44649780021111  | -1.63039838658322 |
| C | -0.68631478550329 | 0.16262772746121  | -0.26288142951472 |
| C | -1.77786057891087 | 0.47337502663918  | 0.56936395654504  |
| C | -2.90825928010879 | 1.09577269204617  | 0.01580950220033  |
| C | -2.96336105548226 | 1.38607791752323  | -1.33683456704448 |
| C | -1.87557528509004 | 1.05136695609906  | -2.15676410763604 |
| H | 0.11609826272667  | 0.19578020255527  | -2.25662257967807 |
| H | -3.74177606256483 | 1.32627200685412  | 0.68315591154139  |
| H | -3.84633641051562 | 1.86553232686750  | -1.76415893374744 |
| H | -1.91188450717916 | 1.27516686927873  | -3.22595822077394 |
| O | 0.43702727296826  | -0.41810789907367 | 0.20547855113350  |

|   |                   |                   |                  |
|---|-------------------|-------------------|------------------|
| C | -1.75881482840528 | 0.09332457735048  | 1.99051555863619 |
| O | -2.62715887087151 | 0.38538671791309  | 2.78584974512474 |
| I | -1.09106359743009 | -2.81753337759690 | 2.05478175612429 |
| C | -0.55690859587299 | -0.73644182476405 | 2.39297121189371 |
| C | 3.59914085661607  | -1.69469571795361 | 3.56805540241040 |
| C | 2.47906335221766  | -0.95935478348607 | 3.20571148859481 |
| C | 1.90834125928935  | -1.11451214535309 | 1.93686946517855 |
| C | 2.47713566390535  | -2.00389552056629 | 1.02136254330224 |
| C | 3.60173546902882  | -2.74383703705023 | 1.37005654339096 |
| C | 4.14263747095938  | -2.57970326732674 | 2.64043849006956 |
| H | 4.05683645267736  | -1.58917190805292 | 4.55139864237550 |
| H | 2.04633219826670  | -0.25507979863414 | 3.92087268267177 |
| H | 2.03690708226091  | -2.11553039391722 | 0.03049918068671 |
| H | 4.05950772898074  | -3.44407620879727 | 0.67139682438232 |
| N | 5.32463816215308  | -3.35722258390549 | 3.01347324479215 |
| O | 5.77743644893030  | -4.12861077338870 | 2.19457605321512 |
| O | 5.78729574454441  | -3.18869372419196 | 4.12194913557856 |
| C | 0.67115692915116  | -0.33174215964495 | 1.59331347460609 |
| H | -0.38725091685668 | -0.65463932037031 | 3.47312884522182 |
| H | 0.84682160164855  | 0.73396782327451  | 1.85084998530206 |

**TOT**

|   |                   |                  |                   |
|---|-------------------|------------------|-------------------|
| C | -0.00485807034976 | 2.20020202845217 | 0.17936838854001  |
| C | -0.22334194684740 | 0.85784262247783 | 0.48301982184816  |
| C | -1.34370323519036 | 0.18102667826289 | -0.03669507501545 |
| C | -2.25891809786719 | 0.89173947592309 | -0.82060669656835 |
| C | -2.05521791156427 | 2.23891466719957 | -1.10995851912980 |
| C | -0.92092698301814 | 2.88589975252955 | -0.61669771616217 |
| H | 0.88292207549961  | 2.69258749661166 | 0.58158011313904  |



|   |                   |                   |                   |
|---|-------------------|-------------------|-------------------|
| H | -3.14893178208458 | 0.38688771313611  | -1.20719033825333 |
| H | -2.77997328390037 | 2.78242067240068  | -1.71965796217683 |
| H | -0.75020477873220 | 3.94113718959203  | -0.84365342822414 |
| O | 0.68977745672959  | 0.21454235085283  | 1.24242346235921  |
| C | -1.43971231433733 | -1.25559193798961 | 0.23398699146753  |
| O | -2.30167813090270 | -2.01022588698071 | -0.47278770946471 |
| C | -0.65759398423426 | -1.79662781989242 | 1.18558978132192  |
| C | 2.42381362874959  | -3.14025042188218 | 4.13909264754284  |
| C | 1.34182775781355  | -2.39812383064339 | 3.68260034265313  |
| C | 1.44028480914152  | -1.64672610278682 | 2.50656675987658  |
| C | 2.64006285056420  | -1.63580424229909 | 1.78885277790278  |
| C | 3.73381719508018  | -2.36741630923841 | 2.23605682692313  |
| C | 3.60683632115176  | -3.11213127621022 | 3.40511642176849  |
| H | 2.36622969073853  | -3.72995303550782 | 5.05390943414916  |
| H | 0.40794431378098  | -2.40016829378095 | 4.25050688636513  |
| H | 2.71498399637367  | -1.04349629712466 | 0.87590955272958  |
| H | 4.67849161370288  | -2.37028023793819 | 1.69230242729116  |
| N | 4.75306974830621  | -3.88455262959800 | 3.88046518339161  |
| O | 5.77258792494977  | -3.85137689769412 | 3.22358551441169  |
| O | 4.62418813419735  | -4.51884793890480 | 4.90659100615452  |
| C | 0.23117773129694  | -0.89983062417394 | 2.00247506576497  |
| H | -0.68771209827139 | -2.86649200554103 | 1.39899392567616  |
| H | -0.31779071864445 | -0.50211354969465 | 2.88221463948822  |
| H | -2.56056440213195 | -1.55142524955736 | -1.28307867577025 |

**PEG**

|   |                   |                   |                   |
|---|-------------------|-------------------|-------------------|
| O | -2.68647350333171 | 4.36923512293768  | -1.33477718430564 |
| O | -3.83455615584758 | 1.82009199546450  | -2.02951051285072 |
| O | -3.10849477557329 | -0.79645427261594 | -0.86074779736152 |

|   |                   |                   |                   |
|---|-------------------|-------------------|-------------------|
| O | 0.19711568362578  | 4.94715100170908  | -1.06937520456811 |
| O | 2.41888925179019  | 3.04748546648311  | -1.04900998496365 |
| O | -0.87511931013023 | -1.47012310662298 | 0.89464781435795  |
| O | 1.88812664760834  | -1.41573310633007 | 1.35567645107858  |
| O | 3.42563132259141  | 0.63309068667006  | -0.04896120042433 |
| C | 3.56319742256113  | 2.43992188709097  | -1.58121631030460 |
| C | 3.49520493291858  | 0.94553209351800  | -1.41340139412069 |
| C | 3.86152128117012  | -0.65742543280287 | 0.28823710640562  |
| C | 3.22304951136958  | -1.05047966619578 | 1.59473844024740  |
| C | 0.97040879587540  | -1.04874833981942 | 2.34761690303756  |
| C | -0.31150754483872 | -1.80732388289314 | 2.13239723690604  |
| C | -1.91337924264816 | -2.33281038729567 | 0.52376638818480  |
| C | -2.40655795288957 | -2.00870832532996 | -0.85937375773243 |
| C | -4.63539161233743 | 0.67273653162551  | -1.95277512552746 |
| C | -3.79502852545808 | -0.56950971209287 | -2.06062351756228 |
| C | -3.75608866117494 | 4.20325518065252  | -2.22326587693136 |
| C | -4.57365704879575 | 2.99667577217511  | -1.85310753764109 |
| C | -0.86629804269773 | 5.70716199404506  | -0.56469122145190 |
| C | -2.05511524014423 | 5.61149425665536  | -1.48029699632408 |
| C | 1.35291524092884  | 5.04824604944672  | -0.28449614276048 |
| C | 2.53149033050187  | 4.44211403869573  | -0.99504074082565 |
| H | 2.60531892747278  | 4.87380422283077  | -2.01408856297971 |
| H | 3.45193209281144  | 4.73398774950134  | -0.45029593517607 |
| H | 1.58806803504843  | 6.11157842443406  | -0.07690784492308 |
| H | 1.21211980372778  | 4.54730019394305  | 0.69465370449547  |
| H | -0.57132107090707 | 6.77241956296927  | -0.47748588407646 |
| H | -1.15674539157697 | 5.36494830818382  | 0.44905844386137  |
| H | -1.71722325704877 | 5.76511812751614  | -2.52475688452954 |

|   |                   |                   |                   |
|---|-------------------|-------------------|-------------------|
| H | -2.75934456910044 | 6.43345880873186  | -1.23966049354316 |
| H | -3.38906630727500 | 4.09942403218315  | -3.26451544262781 |
| H | -4.42504805556174 | 5.08705403819564  | -2.19962403520093 |
| H | -5.47810189459534 | 2.98954969074990  | -2.49414186150692 |
| H | -4.91901729843198 | 3.08848870417208  | -0.80329156936010 |
| H | -5.19480715825617 | 0.64298819461487  | -0.99620089852863 |
| H | -5.38475073291133 | 0.66991784309133  | -2.77009632848493 |
| H | -3.09176092700707 | -0.46680627152180 | -2.91155552487487 |
| H | -4.46183711926698 | -1.42509639263851 | -2.29001091539967 |
| H | -3.06520381380575 | -2.83623127231379 | -1.19145808758255 |
| H | -1.54779273355955 | -1.97221174444788 | -1.55981334491069 |
| H | -2.75951302554520 | -2.26788035210069 | 1.23798369060323  |
| H | -1.56199994726444 | -3.38436093044423 | 0.52976153523595  |
| H | -0.09117874943916 | -2.89328245213995 | 2.16818541913768  |
| H | -1.00999907318167 | -1.58666125715632 | 2.96483310960349  |
| H | 0.78062988954258  | 0.04292552162037  | 2.31766747228783  |
| H | 1.34326682041328  | -1.29362480868531 | 3.36102171494679  |
| H | 3.78067440606647  | -1.88941136160109 | 2.05432447370051  |
| H | 3.28695653859375  | -0.18964719719115 | 2.28529126809477  |
| H | 3.56770773369471  | -1.39515646696399 | -0.48228728315814 |
| H | 4.96585568816646  | -0.68982836993894 | 0.37635844845928  |
| H | 2.61737057197737  | 0.53458041415103  | -1.95105218906075 |
| H | 4.40090600827262  | 0.51514725116172  | -1.88173682601009 |
| H | 3.67889061096777  | 2.67823918177116  | -2.65813911365221 |
| H | 4.46918642290541  | 2.81521227215128  | -1.06361718940199 |

**PEGI**

|   |                   |                  |                   |
|---|-------------------|------------------|-------------------|
| O | -2.61507496343198 | 3.61335687771077 | -1.41519407790985 |
| O | -3.05756758616534 | 1.15401962280479 | -2.99706789463400 |

|   |                   |                   |                   |
|---|-------------------|-------------------|-------------------|
| O | -1.56086201246254 | 0.07075219128978  | -0.83604193333605 |
| O | -0.06576867856338 | 4.87779923957941  | -0.82400916747822 |
| O | 2.05545644452495  | 3.10329500305541  | -0.51398770362135 |
| O | -0.67271017958634 | 0.47971943024341  | 1.87144189151664  |
| O | 0.81633002770554  | -1.71605072680266 | 0.68691971466033  |
| O | 2.80810324625246  | 0.06734507333702  | -0.62932411060853 |
| C | 3.27531283478747  | 2.41620426640139  | -0.87611618183931 |
| C | 3.01262338850467  | 1.09775815430425  | -1.55659887666204 |
| C | 2.22279847705231  | -1.07607428837030 | -1.20003917552640 |
| C | 1.88959101965797  | -2.10217749468872 | -0.14347544198456 |
| C | 1.18398255806735  | -1.15969363385068 | 1.91601535690451  |
| C | -0.02496729268520 | -0.58736008806335 | 2.60649876144021  |
| C | -2.03883632499610 | 0.27311250583737  | 1.45182540992935  |
| C | -2.16303703074294 | -0.59719146415236 | 0.23194420572852  |
| C | -2.92545297760134 | -0.23525918810620 | -2.82436552492786 |
| C | -1.63977545914907 | -0.55909443722721 | -2.08948113883133 |
| C | -3.76443496153459 | 3.26397576544821  | -2.14123700046519 |
| C | -3.96347012963517 | 1.77342763783897  | -2.12061530731371 |
| C | -1.32117988893369 | 5.35198956543730  | -0.40710685742193 |
| C | -2.38221111072044 | 4.99491637911299  | -1.41062679834543 |
| C | 0.94981416949827  | 5.17664889370401  | 0.08585017643329  |
| C | 2.22655327044132  | 4.52584149031788  | -0.35654750404650 |
| H | 2.53387303293912  | 4.90531447295989  | -1.34376815730134 |
| H | 3.02386455433961  | 4.72229847036111  | 0.37785385652604  |
| H | 1.14263491587818  | 6.26628278102942  | 0.15229035051214  |
| H | 0.67864215813022  | 4.84027413225730  | 1.10685055609053  |
| H | -1.30000138312128 | 6.45326285614221  | -0.29290228106136 |
| H | -1.58545366384265 | 4.91992046548794  | 0.57848734218691  |

|   |                   |                   |                   |
|---|-------------------|-------------------|-------------------|
| H | -2.07969169444738 | 5.34853659034335  | -2.41688808196257 |
| H | -3.30451793716529 | 5.54467771519721  | -1.13588812493638 |
| H | -3.68937667397855 | 3.60823497706512  | -3.19208250762628 |
| H | -4.65876854318622 | 3.74923429927133  | -1.70123604297437 |
| H | -5.00755346377591 | 1.55255871140615  | -2.41895806599765 |
| H | -3.83117156092069 | 1.41608663138300  | -1.08386488993319 |
| H | -3.80270720363832 | -0.65339991124244 | -2.29802294624189 |
| H | -2.88980835372956 | -0.71504330937181 | -3.81786271685166 |
| H | -0.79413481899281 | -0.17118705598018 | -2.67947698027172 |
| H | -1.51314866489270 | -1.65494448859390 | -1.99881878575105 |
| H | -3.24517910960711 | -0.76955967211822 | 0.06814863336721  |
| H | -1.68545346032525 | -1.57973716281285 | 0.40193555858479  |
| H | -2.43517338177083 | 1.27866526070777  | 1.25308191861076  |
| H | -2.57803073183548 | -0.15983155133019 | 2.30674115595820  |
| H | -0.78485584135453 | -1.36607369798390 | 2.76341460074168  |
| H | 0.26944623108211  | -0.17407323416804 | 3.58236052100797  |
| H | 1.95959969988376  | -0.38477381576485 | 1.78996766124233  |
| H | 1.59930727042505  | -1.92433115079596 | 2.60340960183078  |
| H | 1.58809540263275  | -3.02729880679634 | -0.66035490056315 |
| H | 2.78696210422088  | -2.33650741254959 | 0.45673040700690  |
| H | 1.29536808955367  | -0.79742772001517 | -1.73582625617020 |
| H | 2.90622860564592  | -1.53844997751717 | -1.94027641436089 |
| H | 2.14068309049085  | 1.21002487619728  | -2.23061613514257 |
| H | 3.88792271605866  | 0.87511714789395  | -2.19756139641643 |
| H | 3.79502339401899  | 3.08171553901236  | -1.58042289056857 |
| H | 3.89949171021448  | 2.28727644780230  | 0.02344452538015  |
| I | 0.59917954078631  | 1.90552083736075  | 0.72433043342455  |

TS\_1

|   |                   |                   |                   |
|---|-------------------|-------------------|-------------------|
| C | -0.96543160769079 | 2.32254385485428  | -2.16328422548764 |
| C | -1.25260883904881 | 1.57968646014680  | -0.99670636839388 |
| C | -2.60120413426594 | 1.24651558141327  | -0.72467377900162 |
| C | -3.64442533424865 | 1.66328118075240  | -1.56377105820262 |
| C | -3.34930121120658 | 2.41072132360071  | -2.69195630814395 |
| C | -2.00888550846589 | 2.73355698667121  | -2.97919300869129 |
| H | 0.07213918212398  | 2.57690781621753  | -2.38931995957069 |
| H | -4.67129674354944 | 1.38544016644832  | -1.31332148705866 |
| H | -4.14611715188223 | 2.74537121385736  | -3.35926520477875 |
| H | -1.78223383043286 | 3.32307743972075  | -3.87208292032844 |
| O | -0.34013489498364 | 1.19455998250455  | -0.14822114434894 |
| C | -2.80420485686147 | 0.42194151583369  | 0.45861886776611  |
| O | -3.87880026444139 | 0.10523208080345  | 0.92077900292814  |
| I | -1.97955123732109 | -2.28421250368979 | 2.04259485245257  |
| C | -1.47359580863678 | -0.01762086441998 | 1.08963308606074  |
| C | 2.75832684771661  | -0.78885887995127 | 2.18795902811329  |
| C | 1.42884514426074  | -0.53174835048828 | 1.89591280591369  |
| C | 0.82869005975818  | -1.11883791207006 | 0.76919785527975  |
| C | 1.57889878921131  | -1.96686258813450 | -0.06050564747110 |
| C | 2.90953533046838  | -2.23594148149785 | 0.22676422954390  |
| C | 3.47507978993400  | -1.63957591590050 | 1.34833399464086  |
| H | 3.24698663340308  | -0.34254360783737 | 3.05375884541081  |
| H | 0.86164913711103  | 0.13113543813297  | 2.55073812938504  |
| H | 1.10975457477593  | -2.42047685465504 | -0.93644337802879 |
| H | 3.50891103896410  | -2.89346446883677 | -0.40242244752521 |
| N | 4.88213858795643  | -1.91553593902293 | 1.65896951144868  |
| O | 5.46996066669588  | -2.70456164757251 | 0.95227611493426  |
| O | 5.37393418594461  | -1.33799650051243 | 2.60348328093811  |

|   |                   |                   |                   |
|---|-------------------|-------------------|-------------------|
| C | -0.55112729946915 | -0.85299375822401 | 0.39230324252834  |
| H | -1.16486199343749 | 0.48584871832901  | 2.01012810604136  |
| H | -0.89106925238204 | -1.27458848647302 | -0.56028401635405 |

## TS\_2

|   |                   |                   |                   |
|---|-------------------|-------------------|-------------------|
| C | 14.78112822206718 | -4.69250470405802 | 5.38161061938033  |
| C | 15.94184289101528 | -4.04962118712774 | 5.83332939061738  |
| C | 15.84733555452911 | -2.75584741954926 | 6.39168657870577  |
| C | 14.59721245487036 | -2.11371560911424 | 6.38848474960368  |
| C | 13.45379349810466 | -2.74315937480619 | 5.91970201542264  |
| C | 13.54951050487778 | -4.05239343101249 | 5.43601749859475  |
| H | 14.87900667710484 | -5.69796739478712 | 4.96587526468118  |
| H | 14.55135519564903 | -1.10366210750878 | 6.80050728786171  |
| H | 12.48999672180078 | -2.23048915005384 | 5.94659410208517  |
| H | 12.65626134954715 | -4.57356581501699 | 5.08221856617862  |
| O | 17.09996306500355 | -4.71924014459558 | 5.67880681316511  |
| H | 17.84324235560488 | -4.10004388660934 | 5.54556016413440  |
| C | 16.96682458349867 | -2.02283879887043 | 7.05267533748502  |
| O | 16.95433697044139 | -0.80041612777492 | 7.10093046584531  |
| C | 18.01875675874381 | -2.80782986314918 | 7.73706224669194  |
| H | 17.93626197016927 | -3.89629457927094 | 7.74303534947382  |
| C | 20.29473754300788 | -4.16958950163192 | 9.20984453273508  |
| C | 20.13671947805299 | -2.77663666494131 | 9.08450108040723  |
| C | 21.09890142775985 | -1.93019190510111 | 9.66166889615355  |
| C | 22.19628631805147 | -2.44787239530523 | 10.33476769914119 |
| C | 22.32344526626859 | -3.82929726524215 | 10.42995694426336 |
| C | 21.38471196049643 | -4.70062183935764 | 9.87875854248769  |
| H | 19.56294333750097 | -4.84789380489403 | 8.76809078242725  |
| H | 22.95483212141614 | -1.80074915613438 | 10.77406842183377 |

|   |                   |                   |                   |
|---|-------------------|-------------------|-------------------|
| H | 21.52578801152813 | -5.77707451441040 | 9.97271572104262  |
| H | 20.98436272946760 | -0.84811362547566 | 9.56611354778704  |
| C | 19.02996176029593 | -2.16970736429534 | 8.35722871068326  |
| N | 23.49188568742209 | -4.38536492422710 | 11.10506728322912 |
| O | 23.57305148851268 | -5.59259321257170 | 11.19938170047467 |
| O | 24.32253991915773 | -3.61093917476676 | 11.53265965855828 |
| H | 19.03171650086703 | -1.07596386207174 | 8.30068718284496  |
| O | 8.85727870010989  | -1.39028643998151 | 0.07499323733426  |
| O | 8.42696652146706  | -4.01885656918041 | -0.90206436803886 |
| O | 9.90432381198446  | -5.55311185555095 | 0.88058556083810  |
| O | 11.38703987752816 | 0.07261855431129  | 0.71718934988387  |
| O | 14.19165176305144 | -0.50106798145268 | 0.39390324568736  |
| O | 12.30393735006335 | -4.08811428130596 | 1.22009466980435  |
| O | 14.81777699296462 | -4.16486836779234 | 2.12272995683269  |
| O | 16.21957006498191 | -2.33901371650767 | 0.83282237797295  |
| C | 15.37003564931139 | -0.49325483565871 | -0.36749828005525 |
| C | 15.91736380479223 | -1.88828719924034 | -0.46936228589843 |
| C | 16.76888186928939 | -3.61831698580523 | 0.93650573747394  |
| C | 16.25970188557741 | -4.18326709583964 | 2.24150423802023  |
| C | 14.20767367190900 | -3.08006635288655 | 2.28881850326612  |
| C | 12.80670596504368 | -2.98039976753748 | 1.86034948936889  |
| C | 11.90827298655691 | -5.16217409467480 | 2.05562133984888  |
| C | 11.12654574425912 | -6.13811641405398 | 1.22183311258081  |
| C | 8.03529815426981  | -5.31097713283910 | -0.52927830913177 |
| C | 9.26272389293836  | -6.12630579822075 | -0.22391977905663 |
| C | 7.97117224609068  | -1.68251219401707 | -0.97429218306784 |
| C | 7.40660271984533  | -3.06734145817487 | -0.80663410677385 |
| C | 10.11379132579574 | 0.25646604058922  | 1.28326093779799  |



|   |                   |                   |                   |
|---|-------------------|-------------------|-------------------|
| C | 9.03905308040988  | -0.01392703634344 | 0.26398295237382  |
| C | 12.41348116092792 | 0.71812092224016  | 1.42114733265853  |
| C | 13.65257533843484 | 0.78179959278829  | 0.57179983067193  |
| H | 13.39989157008631 | 1.23530410021333  | -0.40665895930319 |
| H | 14.38977363856074 | 1.44774299250041  | 1.06250931303713  |
| H | 12.11730555803745 | 1.75549738905241  | 1.67061523108814  |
| H | 12.63339656156678 | 0.20297819993983  | 2.37868771975149  |
| H | 10.00245464707747 | 1.30325688914831  | 1.62523226908040  |
| H | 9.96820250722988  | -0.39677226173106 | 2.16632931110726  |
| H | 9.32280471924358  | 0.48613366435088  | -0.68318140525537 |
| H | 8.09567864854190  | 0.45366397984640  | 0.61167488645642  |
| H | 8.48306074293144  | -1.59263178584586 | -1.95332326013897 |
| H | 7.12166728757447  | -0.97219210890782 | -0.98232507503947 |
| H | 6.62581114836939  | -3.23019790294600 | -1.57740696769069 |
| H | 6.90994709599921  | -3.13446874990429 | 0.18201610211701  |
| H | 7.39615681094105  | -5.27371264200630 | 0.37482052205203  |
| H | 7.44810805839044  | -5.80622439061073 | -1.32830474576132 |
| H | 9.93744251769667  | -6.13427825767556 | -1.10326603406018 |
| H | 8.96383761566765  | -7.17508868044361 | -0.02601035530060 |
| H | 10.98628005381393 | -7.07763724684757 | 1.79262223061887  |
| H | 11.71322063067862 | -6.38698577771004 | 0.31604467982414  |
| H | 11.27479100235995 | -4.78533925098755 | 2.87983625293189  |
| H | 12.78393373260375 | -5.66836597631327 | 2.49778442614069  |
| H | 12.21877162572332 | -2.64732519232705 | 2.74457513397193  |
| H | 12.79565398955226 | -2.10761448737768 | 1.17288926952882  |
| H | 17.13587237900782 | -0.34432805752723 | 4.55255938820050  |
| H | 14.70448033719292 | -2.22582530910097 | 2.77401231079187  |
| H | 16.45788932864481 | -4.26488656077950 | 0.09728130010796  |

|   |                   |                   |                   |
|---|-------------------|-------------------|-------------------|
| H | 17.87301202162151 | -3.59411156741358 | 0.97233975858502  |
| H | 15.18077210928410 | -2.56402237913988 | -0.94330957195872 |
| H | 16.82534751859848 | -1.87215072344507 | -1.09798498291715 |
| H | 15.18231167721953 | -0.10777785200686 | -1.38825544550052 |
| H | 16.12501052471770 | 0.16495620106564  | 0.10474214457136  |
| I | 15.97285888006031 | 0.44766483117322  | 3.73132382084722  |
| I | 21.78351176428666 | -2.83102827856720 | 5.62782954775541  |
| I | 19.19557670352271 | -2.35226667134523 | 4.14804987678652  |
| I | 24.25883544191604 | -3.27594844380104 | 7.02351277183013  |
| H | 16.54657421033755 | -5.22636518148418 | 2.40875222067531  |
| H | 16.55272736039576 | -3.55387930015795 | 3.09245008065473  |

## References

- (a) M.-L. Ma, M. Li, J.-J. Gou, T.Y. Ruan, H.-S. Jin, L.-H. Zhang, L.C. Wu, X.Y. Li, Y.H. Hu and K. Wen, *Bio. & Med. Chem*, 2014, **22(21)**, 6117-6123. (b) J.Y. An, H.-H. Lee, J.S. Shin, H.S. Yoo, J. S. Park, S. H. Son, S. W. Kim, J. Yu, J. Lee and K.T. Lee, *Bio & Med Chem Lett*, 2017, **27**, 2613-2616. (c) V. N. Badavath, S. Ciftci-Yabanoglu, S. Bhakat, A. K. Timiri, B. N. Sinha, G. Ucar, M. E. Soliman and V. Jayaprakash, *Bio. chem*, 2015, **58**, 72-80. (d) Z. Du, H. Ng, K. Zhang, H. Zeng and J. Wang, *Org & Bio Chem*, 2011, **9**, 6930-6933. (e) X. Zhao, R. Fang, F. Wang, X. Kong and Y. Li, *JACS Au*, 2023.
- (a) F. Neese, *Wiley Interdiscip. Rev. Comput. Mol. Sci.* 2012, **2 (1)**, 73-78. (b) F. Neese, *Wiley Interdiscip. Rev. Comput. Mol. Sci.* 2018, **8 (1)**, e1327.
- C. Adamo and V. Barone, *J. Chem. Phys*, 1999, **110**, 6158-6170.
- (a) E. Caldeweyher, C. Bannwarth and S. Grimme, *J. Chem. Phys*, 2017, **147**, 034112. (b) E. Caldeweyher, S. Ehlert, A. Hansen, H. Neugebauer, S. Spicher, C. Bannwarth and S. Grimme, *Chem. Phys.*, 2019, **150**, 154122.
- F. Weigend and R. Ahlrichs, *Phys. Chem. Chem. Phys.*, 2005, **7**, 3297-3305.
- F. Neese, F. Wennmohs, A. Hansen, U. Becker, *Chem. Phys.*, 2009, **356 (1-3)**, 98-109.
- V. Ásgeirsson, B. O. Birgisson, R. Bjornsson, U. Becker, F. Neese, C. Riplinger and H. Jónsson, *J. Chem. Theory Comput.*, 2021, **17**, 4929-4945.
- Tomasi, J.; Mennucci, B.; Cammi, R. Quantum mechanical continuum solvation models. *Chem. Rev.*, 2005, **105 (8)**, 2999-3094.
